# Supplementary material for: Synthesis of unsymmetrical Si-rhodamine fluorophores and application to a far-red to near-infrared fluorescence probe for hypoxia
Source: Royal Society of Chemistry journal article supplement (doi:10.1039/c8cc02451k), 2018-01-01
Supplement: c8cc02451k1.pdf [file c8cc02451k1.pdf]

## Supporting Information

### Synthesis of unsymmetrical Si-rhodamine fluorophores and application to a far-red to near-infrared fluorescence probe for hypoxia

Kenjiro Hanaoka,<sup>\*a</sup> Yu Kagami,<sup>a</sup> Wen Piao,<sup>a</sup> Takuya Myochin,<sup>a</sup> Koji Numasawa,<sup>a</sup> Yugo Kuriki,<sup>a</sup>  
Takayuki Ikeno,<sup>a</sup> Tasuku Ueno,<sup>a</sup> Toru Komatsu,<sup>a</sup> Takuya Terai,<sup>a</sup> Tetsuo Nagano,<sup>b</sup> and Yasuteru  
Urano <sup>\*a,c,d</sup>

<sup>a</sup> Graduate School of Pharmaceutical Sciences, The University of Tokyo, 7-3-1 Hongo, Bunkyo-ku, Tokyo 113-0033, Japan.

<sup>b</sup> Drug Discovery Initiative, The University of Tokyo, 7-3-1 Hongo, Bunkyo-ku, Tokyo 113-0033, Japan.

<sup>c</sup> Graduate School of Medicine, The University of Tokyo, 7-3-1 Hongo, Bunkyo-ku, Tokyo 113-0033, Japan.

<sup>d</sup> AMED CREST (Japan) Agency for Medical Research and Development 1-7-1 Otemachi, Chiyoda-ku, Tokyo 100-0004, Japan

## General Procedure and Materials

Reagents and solvents were of the best grade available, purchased from Tokyo Chemical Industries, Wako Pure Chemical, Aldrich Chemical Co., Dojindo, Watanabe Chemical Industries, Invitrogen and Biosearch Technologies, and were used without further purification. Mice (Jcl:ICR) were purchased from CLEA Japan. Somnopentyl® Injection was purchased from Kyoritsu Seiyaku Corporation. Special chemicals and DMSO (fluorometric grade) used for stock solutions were purchased from Dojindo. Saline was purchased from Otsuka Pharmaceutical Co. Ltd. Reactions were monitored by means of TLC and ESI mass spectrometry. All compounds were purified on a silica gel column and/or by preparative HPLC.

## Instruments

NMR spectra were recorded on a JEOL JNM-LA300 instrument at 300 MHz for  $^1\text{H}$  NMR and at 75 MHz for  $^{13}\text{C}$  NMR, or a JEOL JNM-LA400 instrument at 400 MHz for  $^1\text{H}$  NMR and at 100 MHz for  $^{13}\text{C}$  NMR. Mass spectra (MS) were measured with a JEOL JMS-T100LC AccuToF (ESI). HPLC purifications were performed on an Inertsil ODS-3 (10.0  $\times$  250 mm) column (GL Sciences Inc.) using an HPLC system composed of a pump (PU-2080, JASCO) and a detector (MD-2015 or FP-2025, JASCO) fitted with a reversed-phase column (GL Sciences (Tokyo, Japan), Inertsil ODS-3 10 mm  $\times$  250 mm, using eluent A ( $\text{H}_2\text{O}$  containing 0.1% TFA (v/v)) and eluent B ( $\text{CH}_3\text{CN}$  with 20%  $\text{H}_2\text{O}$  containing 0.1% TFA (v/v)), at the flow rate of 5 ml/min. HPLC analyses were performed on a system composed of a pump (PU-2080, JASCO) and a detector (MD-2015, JASCO), fitted with a reversed-phase column (Inertsil ODS-3 4.6 mm  $\times$  250 mm (GL Sciences, Tokyo, Japan)), using eluent A and eluent B at the flow rate of 1 mL/min. Absorption spectra were obtained with Shimadzu UV-1650 and UV-2550 instruments (Tokyo, Japan). Fluorescence spectroscopic studies were performed with a Hitachi F4500 or F-7000 spectrometer (Tokyo, Japan). The excitation and emission slit widths were 5 nm. UV-Visible spectra were obtained on a Shimadzu UV-1650. Fluorescence spectroscopic studies were performed on a Hitachi F4500. The slit width was 5 nm for both excitation and emission. The photomultiplier voltage was 700 V. Absolute quantum yields were determined with a Hamamatsu Photonics Quantaaurus QY.

## Optical Properties and Relative Fluorescence Quantum Efficiency

Optical properties of dyes except **azoSiR640** and **2,6-diMe SiR640 (65)** were examined in 100 mM sodium phosphate buffer (pH 7.4) containing 1% (v/v) DMSO as a co-solvent. Those of

**azoSiR640** and **2,6-diMe SiR640 (65)** were measured in PBS (pH 7.4) containing 0.1% DMSO as a co-solvent. The absolute fluorescence quantum efficiencies ( $\Phi_f$ ) of **28**, **29** and **30** were determined with a Hamamatsu Photonics Quantaaurus QY. For determination of the fluorescence quantum efficiency ( $\Phi_f$ ) of **25**, **azoSiR640** and **2,6-diMe SiR640 (65)**, Cresyl violet in MeOH ( $\Phi_f = 0.54$ ) was used as a standard. For determination of the fluorescence quantum efficiencies ( $\Phi_f$ ) of SiR640 (**26**), **27** and **31**, Cy5.5 in PBS ( $\Phi_f = 0.24$ ) was used as a standard. Fluorescence quantum efficiencies were calculated according to the following equation.

$$\Phi_x/\Phi_{st} = [A_{st}/A_x][n_x^2/n_{st}^2][D_x/D_{st}]$$

where st: standard; x: sample; A: absorbance at the excitation wavelength;  $n$ : refractive index; D: area under the fluorescence spectra on an energy scale.

For determination of molar extinction coefficient ( $\epsilon$ ) of dyes, we firstly prepared the DMSO stock solution of each dye by dissolving several mg of dye in DMSO and then measured absorbance at the wavelength of absorbance maximum in 100 mM sodium phosphate buffer (pH 7.4) or PBS (pH 7.4) by using the DMSO stock solutions.

## Preparation of Rat Liver Microsomes

All procedures were approved by the Animal Care and Use Committee of the University of Tokyo. Rats (Wistar, 6–7 weeks old) were purchased from CLEA Japan. Rats received intraperitoneal injection of 60 mg/kg sodium phenobarbital once daily for three days, then were fasted overnight and sacrificed by exsanguination from the abdominal aorta. The liver containing 0.15 M KCl (pH 7.4) was homogenized in 3 volumes of the same buffer. Microsomes were prepared according to the method of Omura and Sato.<sup>[S1]</sup> Microsomes contained 67.8 mg protein/mL and 1.82 nmol P450/mg protein. They were diluted with 0.1 M potassium phosphate buffer at pH 7.4 for assay and the final concentration was 226  $\mu$ g/3 mL.

## *In vitro* Assay with Rat Liver Microsomes

The hypoxic condition *in vitro* (enzyme assay in cuvette) was prepared by bubbling argon gas into the reaction solution (0.1 M potassium phosphate buffer (pH 7.4)) for 30 minutes. Rat liver microsomes (226  $\mu$ g/3 mL) were preincubated at 37 °C for 5 min and then 1  $\mu$ M probe containing 0.1% DMSO as a cosolvent was added. As a cofactor for reductases, 50  $\mu$ M NADPH was added at 5 min.

## Cell Lines and Culture Conditions

Human lung carcinoma cell line A549 were purchased from RIKEN Bioresource Center cell bank (Tsukuba, Japan). A549 cells were cultured in DMEM (Dulbecco's modified Eagle's medium) (Invitrogen) containing 10% fetal bovine serum (Invitrogen) and 1% penicillin streptomycin (Invitrogen). All cell lines were maintained at 37°C under 5% CO<sub>2</sub> in air (the standard conditions).

## Hypoxic Conditions for Live Cell Fluorescence Imaging

An O<sub>2</sub> concentration of 0.1% was generated with an Anaero Pack® (Mitsubishi Gas Chemical Company, Inc.) and a 2.5 L rectangular jar (Mitsubishi Gas Chemical Company, Inc.). O<sub>2</sub> concentration in the range of 1–20% was controlled with a multi gas incubator (Sanyo) by means of N<sub>2</sub> substitution.

## Fluorescence Confocal Microscopy

$3 \times 10^4$  A549 cells were seeded on 8-chamber plates (NUNC™) and cultured for one day before assay. Cells were washed with PBS once, and then incubated in 200 µL DMEM containing 100 nM fluorescence probes and 0.1% DMSO as a cosolvent at various oxygen concentrations. Fluorescence confocal microscopic images were acquired by using a Leica Application Suite Advanced Fluorescence (LAS-AF) instrument with a TCS SP5 and a 63×, 40× or 10× objective lens. The light source was a white-light laser. The excitation and emission wavelengths were 640 and 660-750 nm for **2,6-diMe SiR640** and **azoSiR640**, respectively.

## Inhibitor Assay with Diphenyliodonium Chloride

Diphenyliodonium chloride was purchased from Tokyo Chemical Industries and dissolved in MilliQ to make 20 mM stock solution.  $3 \times 10^4$  A549 cells were seeded on 8-chamber plates and cultured for one day before assay. Cells in the presence or the absence of DPI (10 or 100 µM) were incubated under hypoxia (0.1% O<sub>2</sub> concentration) with 100 nM fluorescence probe for 6 hr. Cells were washed with PBS once, then taken up in 200 µL of PBS and images were obtained. An inverted microscope (IX 71, Olympus) equipped with a 20× objective lens (UPlan Apo 20×/0.70, Olympus) and an EM-CCD digital camera (C9000, Hamamatsu Photonics K.K.) was used to obtain fluorescence and DIC images. The fluorescence images were observed through a filter cube (Cy5 for azoSiR640, Olympus).

## Fluorescence Confocal Microscopy of Cells under a Cover Glass

$1.5 \times 10^5$  A549 cells were seeded on 35 mm poly-L-lysine-coated glass-bottomed dishes (Matsunami Glass Ind., Ltd.) and cultured for 2 days before assay. Cells were washed with PBS, then incubated in 1 mL DMEM containing 100 nM azoSiR640 containing 0.1% DMSO as a cosolvent. After incubation for 15 min, the cells were washed with PBS twice, and then a 13-mm-

diameter cover glass (Matsunami Glass Ind., Ltd.) was gently placed on top of them. Fresh DMEM (2 mL) was then added and the culture was continued for 80 min under standard conditions. Fluorescence images were captured using a Leica Application Suite Advanced Fluorescence (LAS-AF) instrument with a Leica TCS SP5. The light source was a white-light laser. The excitation and emission wavelengths were 650 and 700-780 nm, respectively.

### ***In vivo* Imaging of Mice**

All procedures were approved by the Animal Care and Use Committee of the University of Tokyo. ICR mice ( $\sigma^7$ , 5 weeks) were anesthetized with Somnopentyl and azoSiR640 (100  $\mu$ M in 100  $\mu$ L saline solution) was administered through an orbital vein. Fluorescence images were taken for 32 min, then the portal vein and renal vein were ligated with clips at 36 min. Fluorescence images were taken for another 20 min. All animal experiments were conducted in accordance with institutional guidelines. Fluorescence images were captured with a Maestro In-vivo Imaging System (CRi Inc., Woburn, MA), with a red filter (Ex/Em = 616-661 nm / 675 nm L.P.).

### **Computation Details**

All density functional theory (DFT) calculations were performed at the B3LYP<sup>[S2-4]</sup> functional level as implemented in Gaussian 09<sup>[S5]</sup>. The 6-31+G(d) basis set was used for all atoms. The number of imaginary frequencies is 0 for all structures.

## Synthesis and Characterization of Compounds

**Scheme S1.** Synthesis of anilines and hydroxymethylanilines.

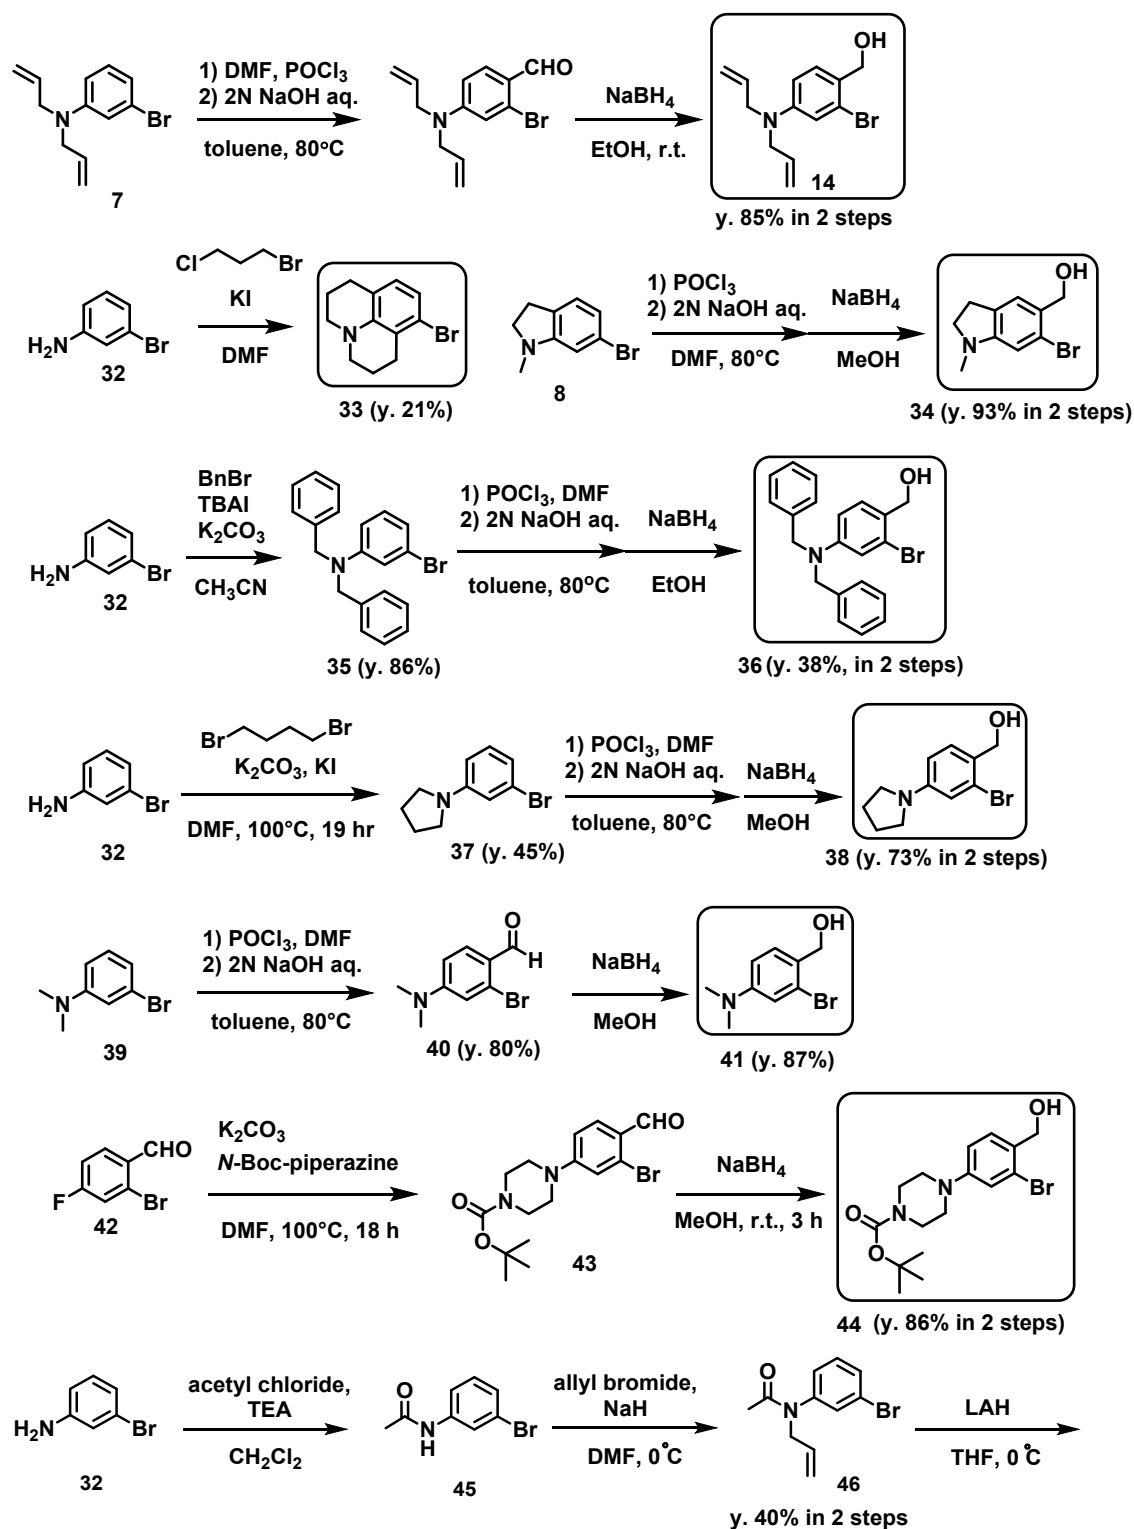

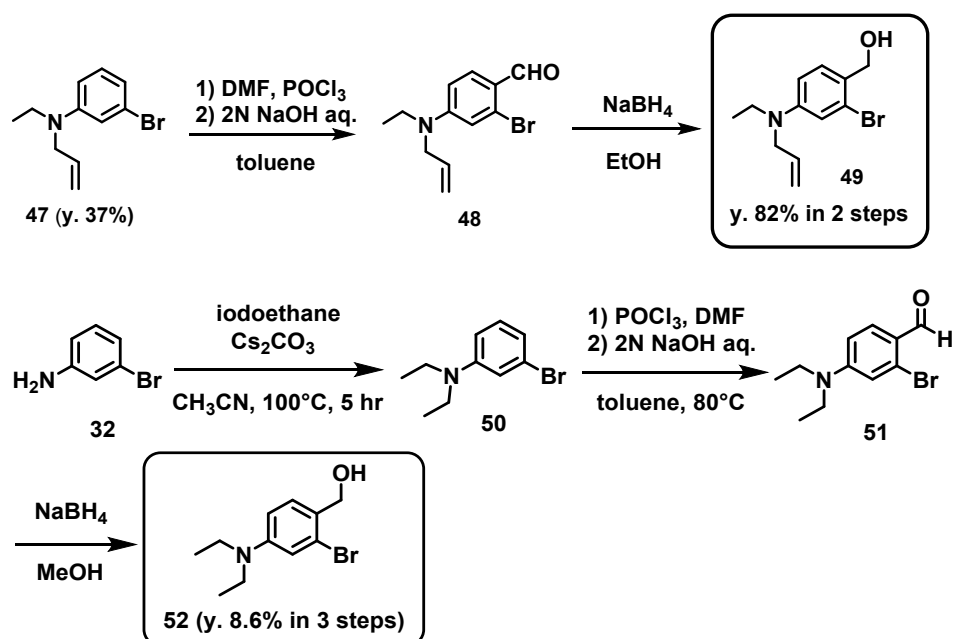

**Scheme S2.** Synthesis of unsymmetrical Si-rhodamines.

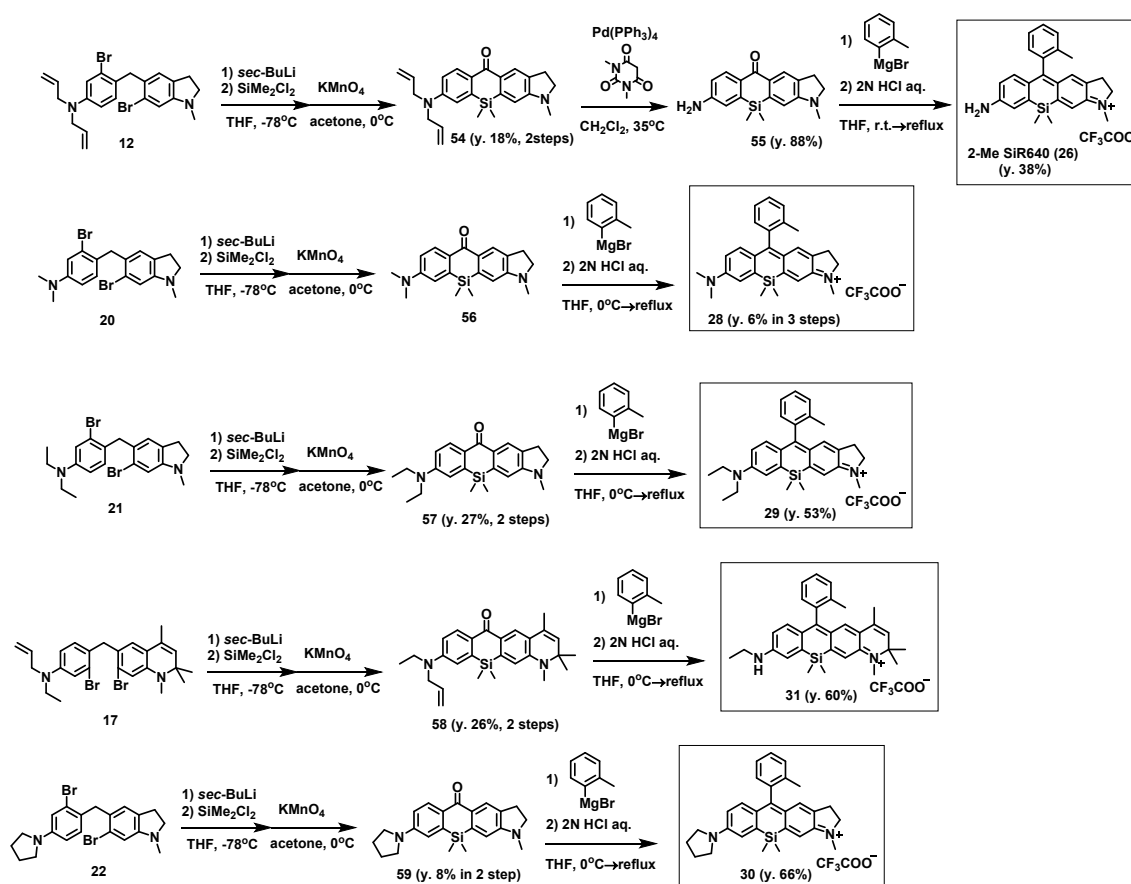

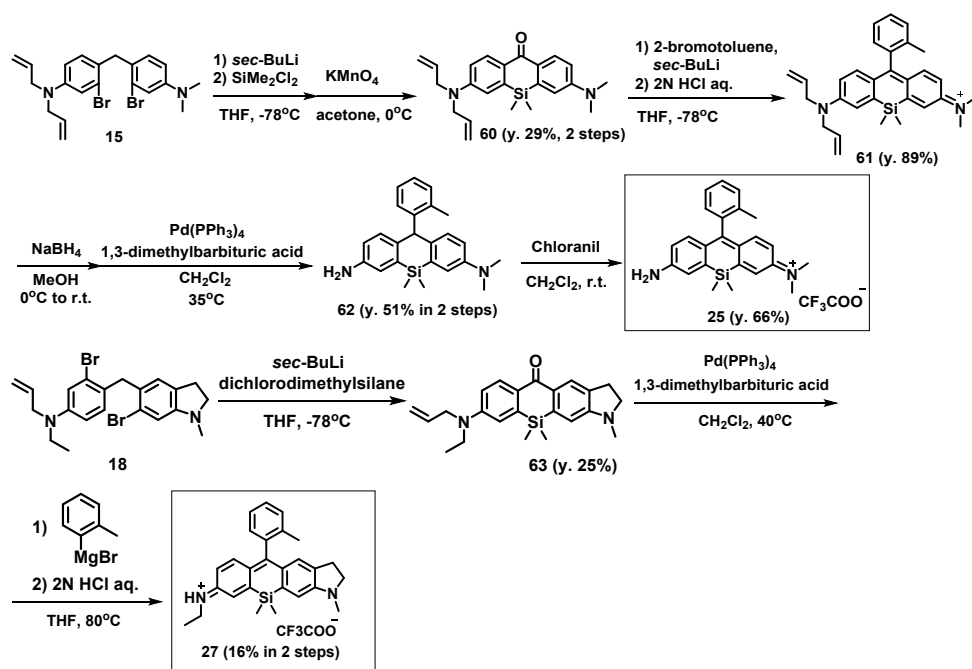

2-Me SiR600, 2-Me SiR650 and 2-Me SiR700 were prepared according to our previous reports.<sup>[S6,7]</sup>

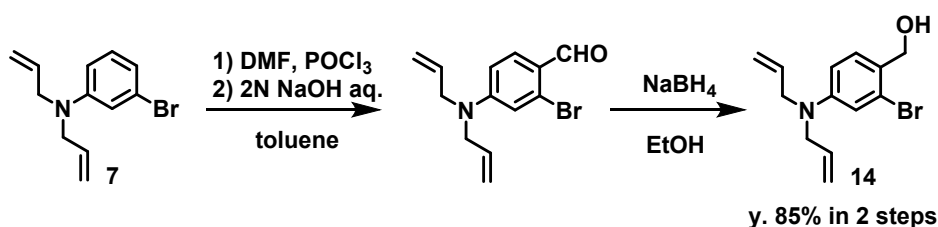

To a solution of 3-bromo-*N,N*-diallylaniline<sup>[S6]</sup> (7) (1.21 g, 4.80 mmol) in toluene (20 mL) were added DMF (456  $\mu$ L, 6.24 mmol) and phosphorus oxychloride (534  $\mu$ L, 5.76 mmol) under an argon atmosphere. The reaction mixture was stirred for 21 hr at 80°C, then cooled in an ice bath, and an aqueous solution of 2 N NaOH was added. Stirring was continued for 5 minutes, and then the mixture was extracted with dichloromethane. The combined organic layer was washed with brine, dried over Na<sub>2</sub>SO<sub>4</sub>, and evaporated under reduced pressure. The residue was taken up in ethanol (10 mL) and sodium borohydride (182 mg, 4.80 mmol), and the mixture was stirred for 1 hr at room temperature. The solvent was evaporated under reduced pressure, then water was added to the residue, and the mixture was extracted with dichloromethane. The organic layer was



dried over Na<sub>2</sub>SO<sub>4</sub> and evaporated under reduced pressure to afford a residue, which was purified by column chromatography (silica gel, AcOEt/*n*-hexane) to afford **14** (1.15 g, 4.08 mmol, 85%). <sup>1</sup>H NMR (300 MHz, CDCl<sub>3</sub>): δ 3.89-3.91 (m, 4H), 4.62 (d, *J* = 6.0 Hz, 2H), 5.12-5.19 (m, 4H), 5.76-5.88 (m, 2H), 6.60 (dd, *J* = 2.3, 8.6 Hz, 1H), 6.86 (d, *J* = 2.3 Hz, 1H), 7.20 (d, *J* = 8.6 Hz, 1H); <sup>13</sup>C NMR (75 MHz, CDCl<sub>3</sub>) δ 52.7, 65.0, 111.3, 115.9, 116.3, 124.4, 127.0, 130.5, 133.0, 149.4; LRMS (ESI<sup>+</sup>) 264 [M–OH]<sup>+</sup>.

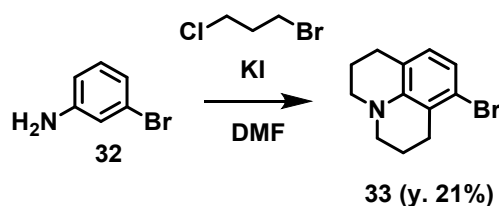

To a solution of 3-bromoaniline (**32**) (2 g, 11.6 mmol) in DMF (8 mL) was added KI (1.5 g, 9.3 mmol). The reaction mixture was stirred for 26 hr at 130°C. The mixture was concentrated *in vacuo* and H<sub>2</sub>O was added to the residue. The aqueous layer was extracted with *n*-hexane. The combined organic layer was washed with brine, dried over Na<sub>2</sub>SO<sub>4</sub> and concentrated *in vacuo*. The residue was purified by column chromatography (silica gel, 10% AcOEt / *n*-hexane) and further purified by GPC to afford **33** (620 mg, 2.46 mmol, 21%).

<sup>1</sup>H NMR (300 MHz, CDCl<sub>3</sub>): δ 1.90-2.01 (m, 4H), 2.69 (t, *J* = 6.6 Hz, 2H), 2.77 (t, *J* = 6.6 Hz, 2H), 3.08-3.15 (m, 4H), 6.63 (d, *J* = 8.0 Hz, 1H), 6.75 (d, *J* = 8.0 Hz, 1H); <sup>13</sup>C NMR (75 MHz, CDCl<sub>3</sub>) δ 21.8, 21.9, 27.6, 28.5, 49.7, 50.0, 119.4, 120.6, 120.7, 122.9, 127.7, 144.5; LRMS (ESI<sup>+</sup>) 254 [M+H]<sup>+</sup>.

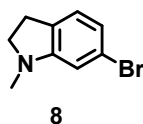

Compound **8** was synthesized as reported previously.<sup>[S7]</sup>

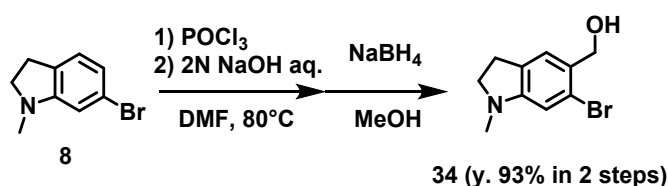

To a solution of 6-bromo-1-methylindoline (**8**) (212 mg, 1.00 mmol) in DMF (5 mL) was added phosphorus oxychloride (139  $\mu$ L, 1.5 mmol) under an argon atmosphere. The reaction mixture was stirred for 14 hr at 80°C, then cooled in an ice bath, and an aqueous solution of 2 N NaOH was added. The mixture was stirred for 15 minutes, and then extracted with dichloromethane. The combined organic layer was washed with brine, dried over Na<sub>2</sub>SO<sub>4</sub>, and evaporated under reduced pressure. Methanol (10 mL) and sodium borohydride (38 mg, 1.00 mmol) were added to the residue, and the mixture was stirred for 1 hr at room temperature, and then evaporated under reduced pressure. H<sub>2</sub>O was added to the residue and the mixture was extracted with dichloromethane. The organic layer was dried over Na<sub>2</sub>SO<sub>4</sub> and evaporated under reduced pressure. The residue was purified by column chromatography (silica gel, AcOEt/*n*-hexane) to afford **34** (224 mg, 0.926 mmol, 85%).

<sup>1</sup>H NMR (300 MHz, CDCl<sub>3</sub>):  $\delta$  1.81 (t,  $J$  = 5.9 Hz, 1H), 2.74 (s, 3H), 2.90 (t,  $J$  = 8.0 Hz, 2H), 3.35 (t,  $J$  = 8.0 Hz, 2H), 4.63 (d,  $J$  = 5.9 Hz, 2H), 6.60 (s, 1H), 7.10 (s, 1H); <sup>13</sup>C NMR (75 MHz, CDCl<sub>3</sub>)  $\delta$  28.1, 35.7, 56.1, 65.0, 110.6, 121.8, 125.3, 128.2, 130.0, 154.0; LRMS (ESI<sup>+</sup>) 244 [M+H]<sup>+</sup>.

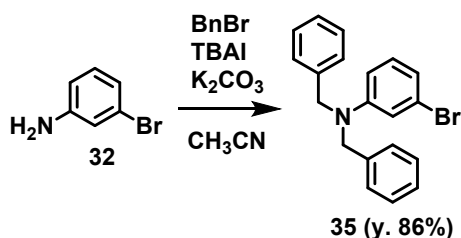

To a solution of 3-bromoaniline (**32**) (2 g, 11.6 mmol) in CH<sub>3</sub>CN (35 mL) were added K<sub>2</sub>CO<sub>3</sub> (4 g, 29.0 mmol), benzyl bromide (3.45 mL, 29.1 mmol) and tetrabutylammonium iodide (429 mg, 1.16 mmol). The reaction mixture was stirred for 63 hr at 80°C. The mixture was concentrated *in vacuo* and H<sub>2</sub>O was added to it. The aqueous layer was extracted with CH<sub>2</sub>Cl<sub>2</sub>. The combined organic layer was washed with brine, dried over Na<sub>2</sub>SO<sub>4</sub> and concentrated *in vacuo*. The residue was purified by column chromatography (silica gel, CH<sub>2</sub>Cl<sub>2</sub>/*n*-hexane) to afford **35** (3.54 g, 10.1 mmol, 21%).

<sup>1</sup>H NMR (300 MHz, CDCl<sub>3</sub>): 4.61 (s, 4H), 6.63 (dd,  $J$  = 8.3, 2.7 Hz, 1H), 6.81 (d,  $J$  = 8.3 Hz, 1H), 6.89 (s, 1H), 6.99 (t,  $J$  = 8.3 Hz, 1H), 7.20-7.36 (m, 10H); <sup>13</sup>C NMR (75 MHz, CDCl<sub>3</sub>)  $\delta$  54.0, 111.1, 115.1, 119.6, 123.5, 126.6, 127.1, 128.7, 130.4, 137.8, 150.5.

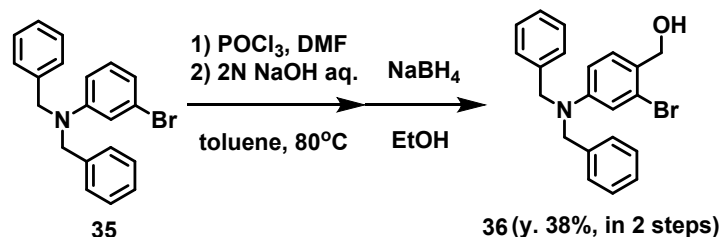

To a solution of **35** (3.51 g, 9.97 mmol) in toluene (20 mL) were added DMF (946  $\mu\text{L}$ , 13.0 mmol) and phosphorus oxychloride (1109  $\mu\text{L}$ , 12.0 mmol) under an argon atmosphere. The reaction mixture was stirred for 15 hr at  $80^{\circ}\text{C}$ , then cooled in an ice bath, and an aqueous solution of 2 N NaOH was added. The mixture was stirred for 30 minutes, then extracted with dichloromethane. The organic layer was washed with brine, dried over  $\text{Na}_2\text{SO}_4$ , and evaporated to dryness. Then, ethanol (20 mL) and sodium borohydride (379 mg, 9.97 mmol) were added to the residue. The mixture was stirred for 3 hr at room temperature and then evaporated to dryness under reduced pressure.  $\text{H}_2\text{O}$  was added to the residue and the mixture was extracted with dichloromethane. The organic layer was dried over  $\text{Na}_2\text{SO}_4$ , and evaporated to dryness under reduced pressure. The residue was purified by column chromatography (silica gel,  $\text{AcOEt}/n$ -hexane) to afford **36** (1.45 g, 3.79 mmol, 38%).

$^1\text{H}$  NMR (300 MHz,  $\text{CDCl}_3$ ): 4.58 (s, 2H), 4.60 (s, 4H), 6.63 (dd,  $J = 8.7, 2.5$  Hz, 1H), 6.94 (d,  $J = 2.5$  Hz, 1H), 7.15 (d,  $J = 8.7$  Hz, 1H), 7.18-7.34 (m, 10H);  $^{13}\text{C}$  NMR (75 MHz,  $\text{CDCl}_3$ )  $\delta$  54.0, 64.9, 111.5, 116.0, 124.5, 126.5, 127.0, 127.5, 128.7, 130.5, 137.6, 149.8; HRMS (ESI $^+$ ) Calcd for  $[\text{M}+\text{Na}]^+$ , 404.0626, Found, 404.0655 (+2.9 mmu).

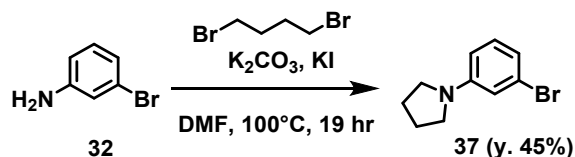

To a solution of 3-bromoaniline (**32**) (2.0 g, 11.6 mmol) in DMF (20 mL) were added  $\text{K}_2\text{CO}_3$  (7.07 g, 51.2 mmol), 1,4-dibromobutane (2.76 g, 12.8 mmol) and KI (10 mg, 60.2  $\mu\text{mol}$ ). The reaction mixture was stirred for 19 hr at  $100^{\circ}\text{C}$  and then concentrated *in vacuo*.  $\text{H}_2\text{O}$  was added to the residue, and the aqueous layer was extracted with  $\text{CH}_2\text{Cl}_2$ . The combined organic layer was washed with brine, dried over  $\text{Na}_2\text{SO}_4$  and evaporated to dryness. The residue was purified by column chromatography (silica gel,  $\text{CH}_2\text{Cl}_2/n$ -hexane) to afford **37** (1.17 g, 5.18 mmol, 45%).

$^1\text{H}$  NMR (300 MHz,  $\text{CDCl}_3$ ):  $\delta$  1.97-2.01 (m, 4H), 3.22-3.27 (m, 4H), 6.45 (dd,  $J = 8.0, 2.2$  Hz, 1H), 6.67 (s, 1H), 6.74 (d,  $J = 8.0$  Hz, 1H), 7.04 (t,  $J = 8.0$  Hz, 1H);  $^{13}\text{C}$  NMR (75 MHz,  $\text{CDCl}_3$ )  $\delta$  25.4, 47.6, 110.2, 114.3, 118.0, 123.3, 130.3, 149.0; LRMS ( $\text{ESI}^+$ ) 226  $[\text{M}+\text{H}]^+$ .

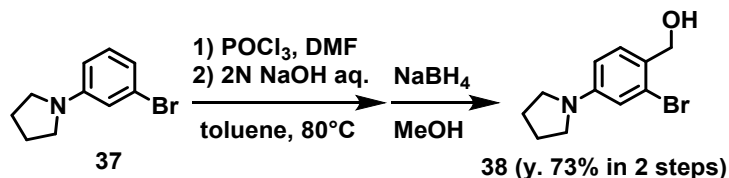

To a solution of **37** (511 mg, 2.26 mmol) in toluene (6.0 mL) were added DMF (214  $\mu\text{L}$ , 2.94 mmol) and phosphorus oxychloride (251  $\mu\text{L}$ , 2.71 mmol) under an argon atmosphere. The reaction mixture was stirred for 14 hr at  $80^\circ\text{C}$ , then cooled in an ice bath, and an aqueous solution of 2 N NaOH was added. The mixture was stirred for 30 minutes, and then extracted with dichloromethane. The organic layer was washed with brine, dried over  $\text{Na}_2\text{SO}_4$ , and evaporated to dryness. Methanol (15 mL),  $\text{CH}_2\text{Cl}_2$  (5 mL) and sodium borohydride (379 mg, 9.97 mmol) were added to the residue. The mixture was stirred for 6 hr at room temperature and then evaporated to dryness.  $\text{H}_2\text{O}$  was added to the residue and the mixture was extracted with dichloromethane. The organic layer was dried over  $\text{Na}_2\text{SO}_4$ , and evaporated to dryness. The residue was purified by column chromatography (silica gel,  $\text{AcOEt}/n$ -hexane) to afford **38** (421 mg, 1.64 mmol, 73%).

$^1\text{H}$  NMR (300 MHz,  $\text{CDCl}_3$ ):  $\delta$  1.79 (t,  $J = 6.2$  Hz, 1H), 1.98-2.03 (m, 4H), 3.24-3.28 (m, 4H), 4.64 (d,  $J = 6.2$  Hz, 1H), 6.47 (dd,  $J = 8.1, 2.1$  Hz, 1H), 6.74 (d,  $J = 2.1$  Hz, 1H), 7.22 (d,  $J = 8.1$  Hz, 1H);  $^{13}\text{C}$  NMR (75 MHz,  $\text{CDCl}_3$ )  $\delta$  25.4, 47.6, 65.2, 110.8, 115.2, 124.5, 125.9, 130.6, 148.6; LRMS ( $\text{ESI}^+$ ) 226  $[\text{M}+\text{H}]^+$ .

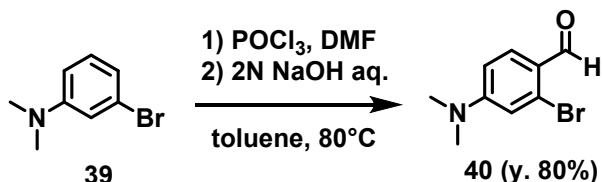

To a solution of 3-bromo-*N,N*-dimethylaniline (**39**) (516 mg, 2.58 mmol) in toluene (4 mL) were added DMF (245  $\mu\text{L}$ , 3.35 mmol) and phosphorus oxychloride (287  $\mu\text{L}$ , 3.10 mmol) under an argon atmosphere. The reaction mixture was stirred for 20 hr at  $80^\circ\text{C}$ , then 2 N NaOH aq. was added under cooling in a water bath. The mixture was stirred for 4 hr, and then extracted with

dichloromethane. The organic solution was washed with brine, dried over Na<sub>2</sub>SO<sub>4</sub>, and evaporated, and the residue was purified by column chromatography (silica gel, AcOEt/*n*-hexane) to obtain **40** (470 mg, 2.06 mmol, 80%).

<sup>1</sup>H NMR (300 MHz, CDCl<sub>3</sub>): δ 3.08 (s, 6H), 6.64 (dd, *J* = 9.0, 2.7 Hz, 1H), 6.80 (d, *J* = 2.7 Hz, 1H), 7.80 (d, *J* = 9.0 Hz), 10.09 (s, 1H); <sup>13</sup>C NMR (75 MHz, CDCl<sub>3</sub>) δ 40.0, 110.5, 114.8, 122.0, 129.7, 131.0, 154.5, 190.1; HRMS (ESI<sup>+</sup>) Calcd for [M+H]<sup>+</sup>, 228.0024, Found, 228.0027 (+0.3 mmu).

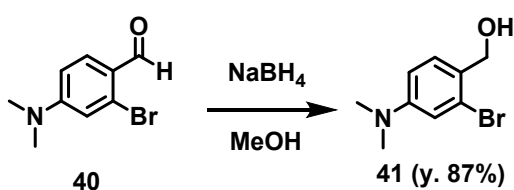

To a solution of **40** (433 mg, 1.90 mmol) in methanol (6.0 mL) was added sodium borohydride (74 mg, 1.90 mmol). The reaction mixture was stirred for 2 hr at room temperature and then concentrated *in vacuo*. H<sub>2</sub>O was added to the residue, and the aqueous layer was extracted with CH<sub>2</sub>Cl<sub>2</sub>. The combined organic layer was washed with brine, dried over Na<sub>2</sub>SO<sub>4</sub> and evaporated to dryness. The residue was purified by column chromatography (silica gel, AcOEt/*n*-hexane) to afford **41** (412 mg, 1.79 mmol, 87%).

<sup>1</sup>H NMR (300 MHz, CD<sub>2</sub>Cl<sub>2</sub>): δ 2.93 (s, 6H), 4.60 (d, *J* = 6.6 Hz, 1H), 6.65 (dd, *J* = 8.1, 3.0 Hz, 1H), 6.89 (d, *J* = 3.0 Hz, 1H), 7.24 (d, *J* = 8.1 Hz, 1H); <sup>13</sup>C NMR (75 MHz, CDCl<sub>3</sub>) δ 40.4, 65.0, 111.4, 116.0, 124.4, 127.0, 130.4, 151.1; HRMS (ESI<sup>+</sup>) Calcd for [M+H]<sup>+</sup>, 230.0181, Found, 230.0162 (−1.9 mmu).

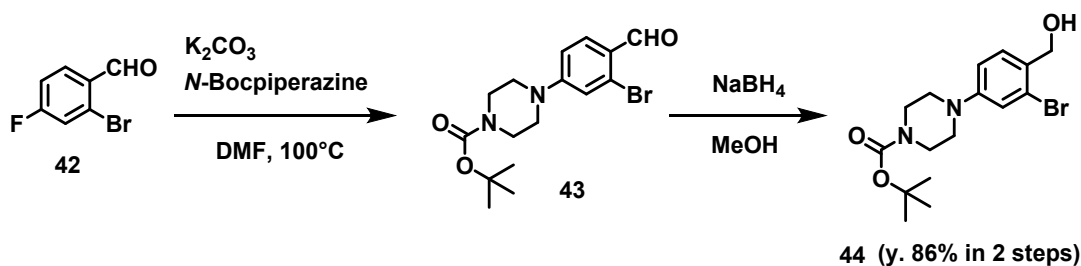

To a solution of 2-bromo-4-fluorobenzaldehyde (**42**) (2.41 g, 12.9 mmol) in DMF (30 mL) were added *N*-Boc-piperazine (2.19 g, 10.8 mmol) and K<sub>2</sub>CO<sub>3</sub> (2.24 g, 16.2 mmol). The reaction mixture was stirred for 18 hr at 100°C, diluted with NaHCO<sub>3</sub> aq., and extracted with CH<sub>2</sub>Cl<sub>2</sub>. The

combined organic layer was washed with brine, dried over Na<sub>2</sub>SO<sub>4</sub> and evaporated to dryness. The residue (crude **43**) was dissolved in methanol (30 mL) and sodium borohydride (494 mg, 13 mmol) was added to it. The reaction mixture was stirred for 3 hr at room temperature and then evaporated to dryness. H<sub>2</sub>O was added to the residue and the mixture was extracted with dichloromethane. The organic layer was dried over Na<sub>2</sub>SO<sub>4</sub>, and evaporated to dryness. The residue was purified by column chromatography (NH silica gel, AcOEt / *n*-hexane) to afford **44** (3.46 g, 9.33 mmol, 86%).

<sup>1</sup>H NMR (300 MHz, CDCl<sub>3</sub>): δ 1.48 (s, 9H), 2.02 (t, *J* = 6.6 Hz, 1H), 3.13 (t, *J* = 5.1 Hz, 4H), 3.56 (t, *J* = 5.1 Hz, 4H), 4.66 (d, *J* = 6.6 Hz, 2H), 6.85 (dd, *J* = 8.1, 2.2 Hz, 1H), 7.08 (d, *J* = 2.1 Hz, 1H), 7.32 (d, *J* = 8.1 Hz, 1H); <sup>13</sup>C NMR (75 MHz, CDCl<sub>3</sub>) δ 28.4, 48.9, 64.8, 80.1, 115.4, 120.1, 123.9, 130.0, 130.9, 151.8, 154.6; LRMS (ESI<sup>+</sup>) 371 [M+H]<sup>+</sup>.

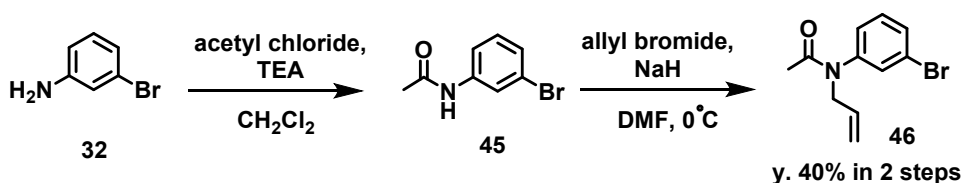

3-Bromoaniline (**32**) (4.3g, 25.0 mmol) was dissolved in CH<sub>2</sub>Cl<sub>2</sub> (50 mL), and acetyl chloride (2.4 g, 30 mmol) was added to the solution. TEA (10 mL) was added dropwise, and the mixture was stirred for 3 hr. The reaction was quenched by adding H<sub>2</sub>O, and the whole was extracted with CH<sub>2</sub>Cl<sub>2</sub>. The organic layer was dried over Na<sub>2</sub>SO<sub>4</sub> and evaporated to dryness. The residue (crude **45**) was dissolved in DMF (30 mL) and NaH (1.2 g, 50.0 mmol) was added to it. The mixture was stirred for 15 min at 0°C. At the same temperature, allyl bromide (6.0g, 4.6 mL) was added, and stirring was continued for 2 hr. The reaction was quenched by adding H<sub>2</sub>O, and the whole was extracted with CH<sub>2</sub>Cl<sub>2</sub>. The organic layer was dried over Na<sub>2</sub>SO<sub>4</sub> and evaporated to dryness. Purification of the residue by column chromatography (silica, CH<sub>2</sub>Cl<sub>2</sub>/hexane = 1/1) provided *N*-allyl-3-bromoacetanilide (**46**) (2.5 g, 9.84 mmol, 39%).

<sup>1</sup>H NMR (300 MHz, CDCl<sub>3</sub>): δ 1.89 (s, 3H), 4.28 (d, *J* = 5.7 Hz, 2H), 5.10-1.15 (m, 2H), 5.80-5.89 (m, 1H), 7.15 (d, *J* = 7.2 Hz, 1H), 7.29 (t, *J* = 8.1 Hz, 1H), 7.36 (s, 1H), 7.48 (d, *J* = 8.1 Hz, 1H); <sup>13</sup>C NMR (75 MHz, CDCl<sub>3</sub>): δ 22.6, 51.9, 118.1, 122.6, 126.6, 130.7, 131.0, 131.1, 132.7, 144.1, 169.6; LRMS (ESI<sup>+</sup>) 254 [M+H]<sup>+</sup>.

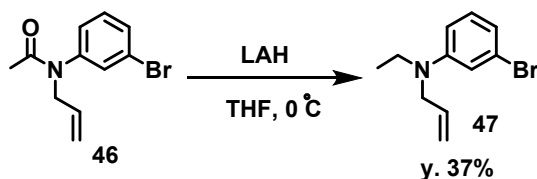

Compound **46** (2.5 g, 10 mmol) was dissolved in THF (30 mL) and lithium aluminium hydride (760 mg, 20 mmol) was added to the solution. The mixture was stirred for 4 hr, then the reaction was quenched by adding sat. potassium sodium tartrate aq. The whole was extracted with  $\text{CH}_2\text{Cl}_2$ . The organic layer was dried over  $\text{Na}_2\text{SO}_4$  and evaporated to dryness. Purification of the residue by column chromatography (silica gel,  $\text{CH}_2\text{Cl}_2$ ) provided **47** (880 mg, 3.66 mmol, 37 %).

$^1\text{H}$  NMR (300 MHz,  $\text{CDCl}_3$ ):  $\delta$  1.57 (t,  $J = 7.20$  Hz, 3H), 3.35 (q,  $J = 7.2$  Hz, 2H), 3.85-3.87 (m, 2H), 5.12-5.18 (m, 2H), 5.76-5.86 (m, 1H), 6.57 (dd,  $J = 2.1, 8.1$  Hz 1H), 6.74-6.79 (m, 2H), 7.02 (d,  $J = 7.5$  Hz);  $^{13}\text{C}$  NMR (75 MHz,  $\text{CDCl}_3$ ):  $\delta$  12.2, 44.8, 52.5, 110.5, 114.6, 116.0, 118.5, 123.4, 130.3, 133.6, 149.4; HRMS ( $\text{ESI}^+$ ) Calcd for  $[\text{M}+\text{H}]^+$ , 240.0388, Found, 240.0387 (−0.1 mmu).

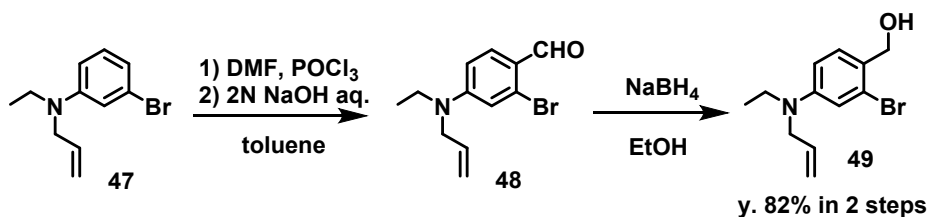

Compound **47** (750 mg, 2.95 mmol), DMF (297 mg, 4.1 mmol) and  $\text{POCl}_3$  (576 mg, 3.8 mmol) were dissolved in toluene (20 mL), and the mixture was heated to  $60^\circ\text{C}$  and stirred for 2 hr. It was then cooled to r.t. and 2 N NaOH was added to it. Stirring was continued for 30 min, and then the mixture was extracted with  $\text{CH}_2\text{Cl}_2$ . The organic layer was dried over  $\text{Na}_2\text{SO}_4$  and evaporated to dryness. The residue (crude **48**) was dissolved in EtOH (20 mL) and cooled to  $0^\circ\text{C}$ .  $\text{NaBH}_4$  (119 mg, 3.1 mmol) was added, and the mixture was stirred for 30 min. The reaction was quenched by adding  $\text{H}_2\text{O}$ , and the whole was extracted with  $\text{CH}_2\text{Cl}_2$ . The organic layer was dried over  $\text{Na}_2\text{SO}_4$  and evaporated to dryness. Purification of the residue by column chromatography (silica gel, AcOEt/hexane = 3/7) provided **49** (693 mg, 2.44 mmol, 83%).

$^1\text{H}$  NMR (300 MHz,  $\text{CDCl}_3$ ):  $\delta$  1.88 t,  $J = 7.5$  Hz, 3H), 3.38 (q,  $J = 7.5$  Hz, 2H), 4.62 (d,  $J = 5.1$  Hz, 2H), 5.12-5.18 (m, 2H), 5.77-5.86 (m, 2H), 6.60 (d,  $J = 8.1$  Hz, 1H), 6.85 (d,  $J = 4.5$  Hz, 1H), 7.20 (dd,  $J = 4.5, 8.1$  Hz, 1H);  $^{13}\text{C}$  NMR (75 MHz,  $\text{CDCl}_3$ ):  $\delta$  12.2, 44.9, 52.5, 65.0, 111.1, 115.5, 116.1, 124.6, 126.4, 130.6, 133.4, 148.9; HRMS ( $\text{ESI}^+$ ) Calcd for  $[\text{M}+\text{H}]^+$ , 270.0494, Found, 270.0510 (+1.6 mmu).

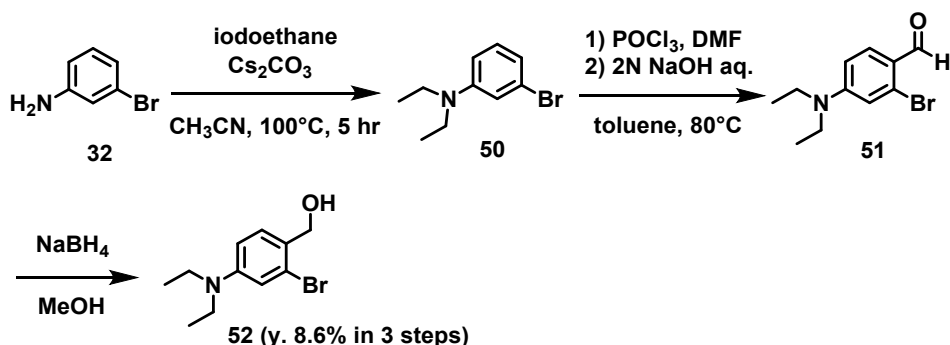

3-Bromoaniline (**32**) (1.70 g, 10.0 mmol), iodoethane (7.75 g, 50.0 mmol) and  $\text{Cs}_2\text{CO}_3$  (16.3 g, 50.0 mol) were dissolved in  $\text{CH}_3\text{CN}$  (20 mL), and the mixture was refluxed at  $100^\circ\text{C}$  for 5 hr.  $\text{H}_2\text{O}$  was added to it, and the whole was extracted with  $\text{CH}_2\text{Cl}_2$ . The organic layer was dried over  $\text{Na}_2\text{SO}_4$  and evaporated to dryness. Partial purification of the residue by column chromatography (silica gel,  $\text{CH}_2\text{Cl}_2/\text{hexane} = 2/8$ ) provided crude **50**. Compound **50**, DMF (2.0 mL) and  $\text{POCl}_3$  (2.0 mL) were dissolved in toluene (40 mL), and the mixture was heated to  $60^\circ\text{C}$  and stirred overnight. The mixture was cooled to r.t., 2 N NaOH was added to it, and stirring was continued for 30 min, followed by extraction with  $\text{CH}_2\text{Cl}_2$ . The organic layer was dried over  $\text{Na}_2\text{SO}_4$  and evaporated to dryness. The residue (crude **51**) was dissolved in MeOH (50 mL). The solution was cooled to  $0^\circ\text{C}$ , then  $\text{NaBH}_4$  (227 mg, 5.97 mmol) was added to it, and the mixture was stirred for 30 min. The reaction was quenched by adding  $\text{H}_2\text{O}$ , and the whole was extracted with  $\text{CH}_2\text{Cl}_2$ . The organic layer was dried over  $\text{Na}_2\text{SO}_4$  and evaporated to dryness. Purification of the residue by column chromatography (silica gel,  $\text{AcOEt}/\text{hexane} = 3/7$ ) provided **52** (220 mg, 8.6%).

$^1\text{H}$  NMR (300 MHz,  $\text{CDCl}_3$ ):  $\delta$  1.14 (t,  $J = 7.2$  Hz, 6H), 2.06 (t,  $J = 6.0$  Hz, 1H), 3.32 (q,  $J = 7.2$  Hz, 4H), 4.50 (d,  $J = 6.0$  Hz, 2H), 6.56 (dd,  $J = 2.1, 7.5$  Hz, 1H), 6.82 (d,  $J = 2.1$  Hz, 1H), 7.20 (d,  $J = 9.0$  Hz, 1H);  $^{13}\text{C}$  NMR (100 MHz,  $\text{CDCl}_3$ ):  $\delta$  12.4, 44.3, 64.9, 110.7, 115.1, 124.7, 125.9, 130.6, 148.4; HRMS (ESI $^+$ ) Calcd for  $[\text{M}+\text{H}]^+$ , 258.0494, Found, 258.0497 (+0.3 mmu).

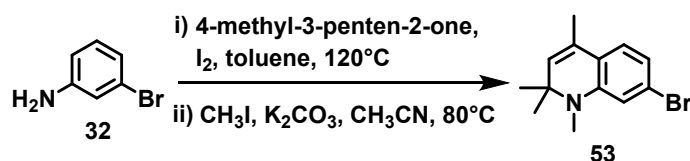

Compound **53** was synthesized as reported previously.<sup>[S7]</sup>



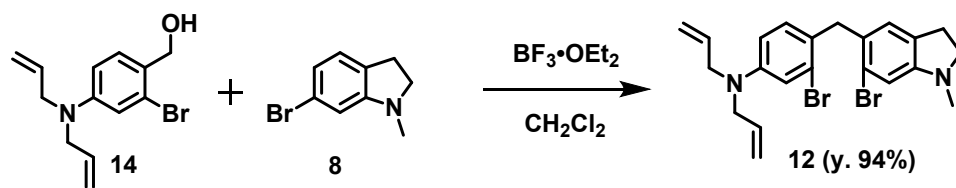

To a solution of **14** (73 mg, 0.260 mmol) and **8** (55 mg, 0.260 mmol) in  $\text{CH}_2\text{Cl}_2$  (5 mL) was added  $\text{BF}_3 \cdot \text{OEt}_2$  (65  $\mu\text{L}$ , 0.520 mmol). The reaction mixture was stirred for 24 hr at room temperature, diluted with water and extracted with  $\text{CH}_2\text{Cl}_2$ . The organic layer was dried over  $\text{Na}_2\text{SO}_4$  and evaporated to dryness. The residue was purified by column chromatography (silica gel,  $\text{CH}_2\text{Cl}_2/n$ -hexane) to afford **12** (116 mg, 0.244 mmol, 94%).

$^1\text{H}$  NMR (300 MHz,  $\text{CDCl}_3$ ):  $\delta$  2.73 (s, 3H), 2.83 (t,  $J = 8.1$  Hz, 2H), 3.28 (t,  $J = 8.1$  Hz, 2H), 3.87-3.88 (m, 4H), 3.97 (s, 2H), 5.14-5.20 (m, 4H), 5.76-5.89 (m, 2H), 6.64 (dd,  $J = 2.5, 8.2$  Hz, 1H), 6.65 (s, 1H), 6.73 (s, 1H), 6.80 (d,  $J = 8.2$  Hz, 1H), 6.90 (d,  $J = 2.5$  Hz, 1H);  $^{13}\text{C}$  NMR (75 MHz,  $\text{CDCl}_3$ )  $\delta$  28.4, 36.0, 40.1, 52.7, 56.3, 110.9, 111.6, 115.9, 116.3, 123.1, 125.5, 126.1, 127.1, 128.1, 130.2, 130.7, 133.5, 148.1, 153.0; LRMS ( $\text{ESI}^+$ ) 477  $[\text{M}+\text{H}]^+$ .

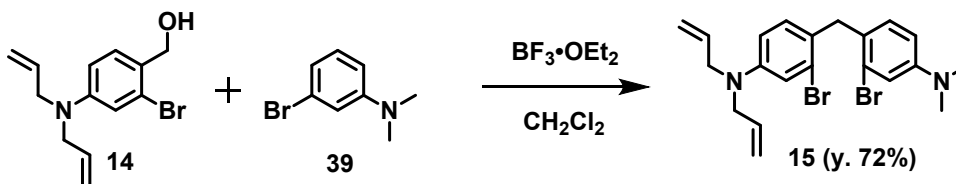

To a solution of **14** (18.1 mg, 64.4  $\mu\text{mol}$ ) and **39** (14.5 mg, 72.5  $\mu\text{mol}$ ) in  $\text{CH}_2\text{Cl}_2$  (5 mL) was added  $\text{BF}_3 \cdot \text{OEt}_2$  (16  $\mu\text{L}$ , 129  $\mu\text{mol}$ ). The reaction mixture was stirred for 8 hr at  $37^\circ\text{C}$ , diluted with water, and extracted with  $\text{CH}_2\text{Cl}_2$ . The organic layer was dried over  $\text{Na}_2\text{SO}_4$  and evaporated to dryness. The residue was purified by column chromatography (silica gel,  $\text{AcOEt}/n$ -hexane) to afford **15** (21.5 mg, 46.3  $\mu\text{mol}$ , 72%).

$^1\text{H}$  NMR (300 MHz,  $\text{CDCl}_3$ ):  $\delta$  2.91 (s, 6H), 3.86-3.88 (m, 4H), 3.98 (s, 2H), 5.14-5.19 (m, 4H), 5.76-5.89 (m, 2H), 6.54 (dd,  $J = 2.5, 8.8$  Hz, 1H), 6.59 (dd,  $J = 2.4, 8.5$  Hz, 1H), 6.79 (d,  $J = 8.8$  Hz, 1H), 6.87 (d,  $J = 8.5$  Hz, 1H), 6.90 (d,  $J = 2.5$  Hz, 1H), 6.93 (d,  $J = 2.4$  Hz, 1H);  $^{13}\text{C}$  NMR (75 MHz,  $\text{CDCl}_3$ ):  $\delta$  39.8, 40.5, 52.7, 111.7, 111.8, 116.0, 116.2, 125.5, 125.6, 126.9, 127.1, 130.7, 130.8, 133.5, 148.1, 150.0; LRMS ( $\text{ESI}^+$ ) 465  $[\text{M}+\text{H}]^+$ .

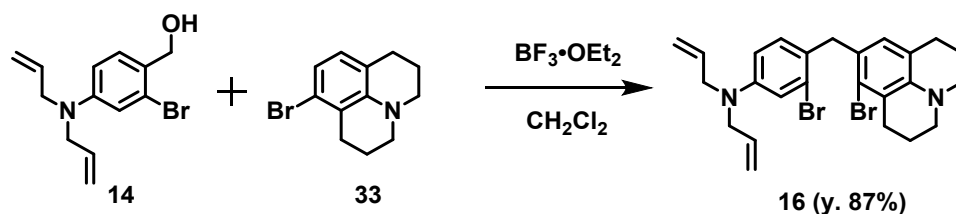

To a solution of **14** (25 mg, 89.0  $\mu\text{mol}$ ) and **33** (22 mg, 89.0  $\mu\text{mol}$ ) in  $\text{CH}_2\text{Cl}_2$  (8 mL) was added  $\text{BF}_3 \cdot \text{OEt}_2$  (22  $\mu\text{L}$ , 178  $\mu\text{mol}$ ). The reaction mixture was stirred for 3 hr at room temperature, then diluted with water and extracted with  $\text{CH}_2\text{Cl}_2$ . The organic layer was dried over  $\text{Na}_2\text{SO}_4$ . The solvent was evaporated to dryness, and the residue was purified by column chromatography (silica gel,  $\text{CH}_2\text{Cl}_2/n\text{-hexane}$ ) to afford **16** (40 mg, 77.5  $\mu\text{mol}$ , 87%).

$^1\text{H}$  NMR (300 MHz,  $\text{CDCl}_3$ ):  $\delta$  1.89-2.03 (m, 4H), 2.64 (t,  $J = 6.6$  Hz, 2H), 2.82 (t,  $J = 6.6$  Hz, 2H), 3.05-3.12 (m, 4H), 3.86-3.88 (m, 4H), 3.95 (s, 2H), 5.14-5.19 (m, 4H), 5.76-5.89 (m, 2H), 6.49 (s, 1H), 6.54 (dd,  $J = 9.0, 3.0$  Hz, 1H), 6.79 (d,  $J = 9.0$  Hz, 1H), 6.90 (d,  $J = 3.0$  Hz, 1H);  $^{13}\text{C}$  NMR (75 MHz,  $\text{CDCl}_3$ )  $\delta$  22.0, 22.3, 27.5, 29.4, 40.9, 49.6, 50.1, 52.8, 111.7, 116.0, 116.3, 120.8, 121.3, 125.6, 125.6, 127.0, 127.3, 128.6, 128.7, 130.7, 133.7, 143.0, 148.1; HRMS (ESI $^+$ ) Calcd for  $[\text{M}+\text{H}]^+$ , 515.0698 Found, 515.0712 (+1.5 mmu).

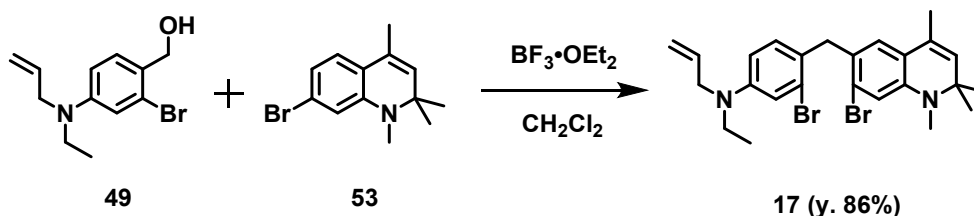

Compounds **49** (375 mg, 1.38 mmol) and **53** (795 mg, 3 mmol) were dissolved in  $\text{CH}_2\text{Cl}_2$  (20 mL).  $\text{BF}_3 \cdot \text{OEt}_2$  (391 mg, 346  $\mu\text{L}$ , 2.76 mmol) was added, and the solution was stirred at r.t. for 23 hr. The reaction was quenched by adding  $\text{H}_2\text{O}$ , and the whole was extracted with  $\text{CH}_2\text{Cl}_2$ . The organic layer was dried over  $\text{Na}_2\text{SO}_4$  and evaporated to dryness. Purification of the residue by column chromatography (silica gel,  $\text{AcOEt/hexane} = 1/9$ ) provided **17** (614 mg, 86%).

$^1\text{H}$  NMR (300 MHz,  $\text{CDCl}_3$ ):  $\delta$  1.14 (t,  $J = 6.6$  Hz, 3H), 1.29 (s, 6H), 1.86 (s, 3H), 2.77 (s, 3H), 3.32 (q,  $J = 6.6$  Hz, 2H), 3.80-3.84 (m, 2H), 3.96 (s, 2H), 5.11-5.17 (m, 2H), 5.28 (s, 1H), 5.75-5.90 (m, 1H), 6.50 (dd,  $J = 2.1, 6.6$  Hz, 1H), 6.69-6.89 (m, 4H);  $^{13}\text{C}$  NMR (75 MHz,  $\text{CDCl}_3$ ):  $\delta$  12.2, 18.4, 27.2, 30.7, 39.9, 44.8, 52.6, 56.4, 113.4, 114.3, 115.7, 116.0, 122.8, 124.8, 125.5,

125.6, 126.4, 126.5, 127.6, 130.4, 130.5, 134.0, 144.7, 147.6; HRMS (ESI<sup>+</sup>): Calcd for [M+H]<sup>+</sup>, 519.0833; found, 519.0878 (+4.4 mmu).

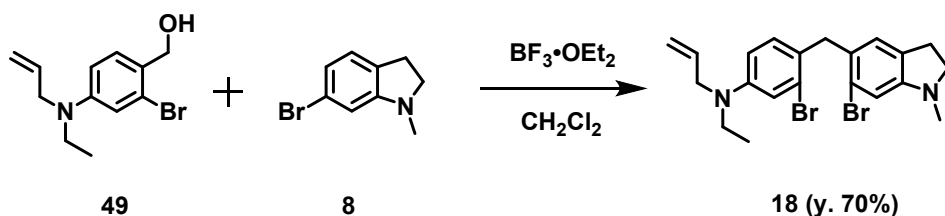

Compounds **49** (693 mg, 2.6 mmol) and **8** (542 mg, 5.1 mmol) were dissolved in CH<sub>2</sub>Cl<sub>2</sub> (20 mL). BF<sub>3</sub>·OEt<sub>2</sub> (623 μL, 5.0 mmol) was added, and the solution was stirred at r.t. for 23 hr. The reaction was quenched by adding H<sub>2</sub>O, and the whole was extracted with CH<sub>2</sub>Cl<sub>2</sub>. The organic layer was dried over Na<sub>2</sub>SO<sub>4</sub> and evaporated to dryness. Purification of the residue by column chromatography (silica gel, AcOEt/hexane = 1/9) provided **18** (825 mg, 1.78 mmol, 70 %).

<sup>1</sup>H NMR (300 MHz, CDCl<sub>3</sub>): δ 1.15 (t, *J* = 6.6 Hz, 3H), 2.72 (s, 3H), 2.82 (t, *J* = 8.1 Hz, 2H), 3.28 (t, *J* = 8.1 Hz, 2H), 3.33 (q, *J* = 6.6 Hz, 2H), 3.84-3.85 (m, 2H), 3.97 (s, 2H), 5.13-5.19 (m, 2H), 5.78-5.88 (m, 1H), 6.53 (dd, *J* = 3.0, 8.1 Hz, 1H), 6.65 (s, 1H), 6.73 (s, 1H), 6.80 (d, *J* = 8.1 Hz, 1H), 6.88 (d, *J* = 3.0 Hz, 1H); <sup>13</sup>C NMR (75 MHz, CDCl<sub>3</sub>): δ 12.2, 28.4, 36.0, 40.1, 44.8, 52.6, 56.3, 110.9, 111.4, 115.6, 116.0, 123.0, 125.7, 126.1, 126.5, 128.1, 130.2, 130.8, 134.0, 147.7, 153.0; HRMS (ESI<sup>+</sup>): Calcd for [M+H]<sup>+</sup>, 465.0364; found, 465.0380 (+1.6 mmu).

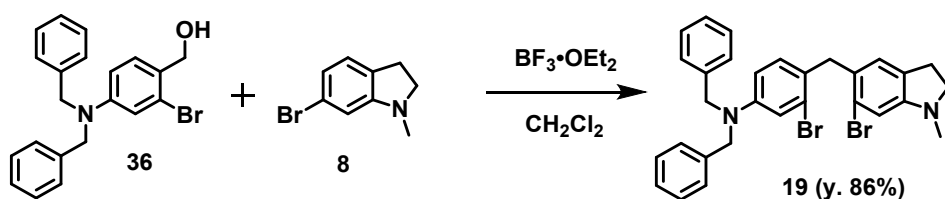

To a solution of **36** (40 mg, 105 μmol) and **8** (22 mg, 105 μmol) in CH<sub>2</sub>Cl<sub>2</sub> (8 mL) was added BF<sub>3</sub>·OEt<sub>2</sub> (27 μL, 210 μmol). The reaction mixture was stirred for 17 hr at room temperature, diluted with water and extracted with CH<sub>2</sub>Cl<sub>2</sub>. The organic layer was dried over Na<sub>2</sub>SO<sub>4</sub> and evaporated to dryness. The residue was purified by GPC to afford **19** (52 mg, 90.2 μmol, 86%).

<sup>1</sup>H NMR (300 MHz, CDCl<sub>3</sub>): δ 2.72 (s, 3H), 2.83 (t, *J* = 8.1 Hz, 2H), 3.28 (t, *J* = 8.1 Hz, 2H), 3.96 (s, 2H), 4.59 (s, 4H), 6.56 (dd, *J* = 8.7, 2.7 Hz, 1H), 6.63 (s, 1H), 6.74-6.77 (m, 2H), 6.98 (d, *J* = 2.7 Hz, 1H), 7.20-7.35 (m, 10H); <sup>13</sup>C NMR (75 MHz, CDCl<sub>3</sub>) δ 28.3, 36.0, 40.1, 54.1, 56.2,

110.8, 111.9, 116.0, 123.1, 125.6, 126.2, 126.7, 127.0, 127.7, 128.7, 130.2, 130.7, 138.1, 148.7, 153.1; HRMS (ESI<sup>+</sup>) Calcd for [M+H]<sup>+</sup>, 577.0677, Found, 577.0678 (+0.1 mmu).

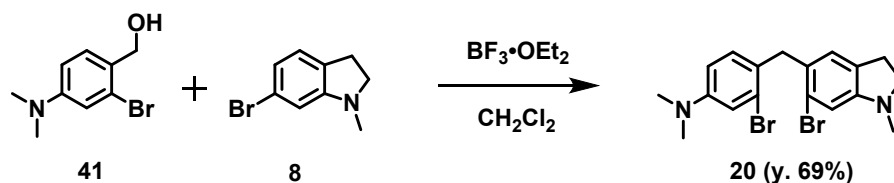

To a solution of **41** (25 mg, 109  $\mu\text{mol}$ ) and **8** (23 mg, 109  $\mu\text{mol}$ ) in  $\text{CH}_2\text{Cl}_2$  (6 mL) was added  $\text{BF}_3 \cdot \text{OEt}_2$  (28  $\mu\text{L}$ , 218  $\mu\text{mol}$ ). The reaction mixture was stirred for 17.5 hr at room temperature, diluted with water and extracted with  $\text{CH}_2\text{Cl}_2$ . The organic layer was dried over  $\text{Na}_2\text{SO}_4$  and evaporated to dryness. The residue was purified by column chromatography (silica gel,  $\text{AcOEt}/n$ -hexane) to afford **20** (32 mg, 75.5  $\mu\text{mol}$ , 69%).

<sup>1</sup>H NMR (300 MHz,  $\text{CDCl}_3$ ):  $\delta$  2.73 (s, 3H), 2.81 (t,  $J = 8.1$  Hz, 2H), 2.91 (s, 6H), 3.28 (t,  $J = 8.1$  Hz, 2H), 3.98 (s, 2H), 6.59 (dd,  $J = 8.8, 2.2$  Hz, 1H), 6.65 (s, 1H), 6.70 (s, 1H), 6.86 (d,  $J = 2.2$  Hz, 1H), 6.93 (d,  $J = 8.8$  Hz, 1H); <sup>13</sup>C NMR (75 MHz,  $\text{CDCl}_3$ )  $\delta$  28.3, 36.0, 40.2, 40.5, 56.3, 110.9, 111.8, 116.2, 123.0, 125.6, 126.0, 127.2, 128.1, 130.1, 130.7, 145.0, 153.0; HRMS (ESI<sup>+</sup>) Calcd for [M+H]<sup>+</sup>, 425.0051, Found, 425.0022 (−2.9 mmu).

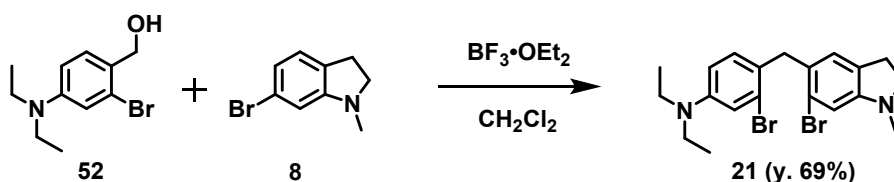

Compound **52** (220 mg, 0.86 mmol) and 6-bromo-1-methylindoline (**8**) (235 mg, 1.11 mmol) were dissolved in  $\text{CH}_2\text{Cl}_2$  (20 mL).  $\text{BF}_3 \cdot \text{OEt}_2$  (130  $\mu\text{L}$ , 1.1 mmol) was added, and the solution was stirred r.t. for 23 hr. The reaction was quenched by adding  $\text{H}_2\text{O}$ , and the whole was extracted with  $\text{CH}_2\text{Cl}_2$ . The organic layer was dried over  $\text{Na}_2\text{SO}_4$  and evaporated to dryness. Purification of the residue by column chromatography (silica gel,  $\text{AcOEt}/\text{hexane} = 1/9$ ) provided **21** (284 mg, 72%).

<sup>1</sup>H NMR (300 MHz,  $\text{CD}_2\text{Cl}_2$ ):  $\delta$  1.05 (t,  $J = 8.4$  Hz, 6H), 2.63 (s, 3H), 2.73 (t,  $J = 8.7$  Hz, 2H), 3.17-3.26 (m, 5H), 3.85 (s, 2H), 6.44 (dd,  $J = 3.0, 8.1$  Hz, 1H), 6.55 (s, 1H), 6.63 (s, 1H), 6.72 (d,  $J = 8.1$  Hz, 1H), 6.78 (d,  $J = 3.0$  Hz, 1H); <sup>13</sup>C NMR (100 MHz,  $\text{CD}_2\text{Cl}_2$ ):  $\delta$  12.7, 28.7, 36.2, 40.5,

44.7, 56.6, 111.0, 111.5, 115.6, 123.2, 126.0, 126.2, 126.4, 128.4, 130.8, 131.3, 147.9, 153.7; HRMS (ESI<sup>+</sup>) Calcd for [M+H]<sup>+</sup>, 451.0385, Found, 451.0373 (−1.2 mmu).

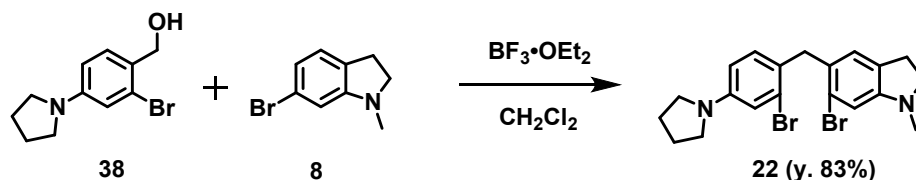

To a solution of **38** (39 mg, 152  $\mu\text{mol}$ ) and **8** (32 mg, 152  $\mu\text{mol}$ ) in  $\text{CH}_2\text{Cl}_2$  (10 mL) was added  $\text{BF}_3 \cdot \text{OEt}_2$  (38  $\mu\text{L}$ , 304  $\mu\text{mol}$ ). The reaction mixture was stirred for 13 hr at room temperature, diluted with water, and extracted with  $\text{CH}_2\text{Cl}_2$ . The organic layer was dried over  $\text{Na}_2\text{SO}_4$  and evaporated to dryness. The residue was purified by column chromatography (silica gel,  $\text{CH}_2\text{Cl}_2/n$ -hexane) to afford **22** (57.1 mg, 127  $\mu\text{mol}$ , 83%).

<sup>1</sup>H NMR (300 MHz,  $\text{CDCl}_3$ ):  $\delta$  1.96–2.01 (m, 4H), 2.72 (s, 3H), 2.81 (t,  $J = 8.0$  Hz, 2H), 3.22–3.30 (m, 6H), 3.98 (s, 2H), 6.42 (dd,  $J = 8.1, 2.1$  Hz, 1H), 6.65 (s, 1H), 6.69 (s, 1H), 6.78 (d,  $J = 2.1$  Hz, 1H), 6.85 (d,  $J = 8.1$  Hz, 1H); <sup>13</sup>C NMR (75 MHz,  $\text{CDCl}_3$ )  $\delta$  25.4, 28.3, 36.0, 40.2, 47.6, 56.3, 110.8, 111.0, 115.1, 123.0, 125.6, 125.9, 126.0, 128.3, 130.1, 130.9, 147.3, 152.9; HRMS (ESI<sup>+</sup>) Calcd for [M+H]<sup>+</sup>, 451.0208, Found, 451.0222 (+1.4 mmu).

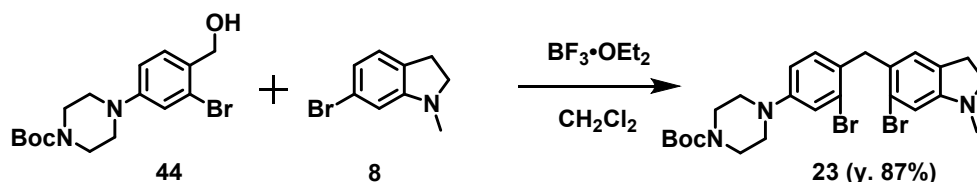

To a solution of **44** (41 mg, 110  $\mu\text{mol}$ ) and **8** (23 mg, 108  $\mu\text{mol}$ ) in  $\text{CH}_2\text{Cl}_2$  (5 mL) was added  $\text{BF}_3 \cdot \text{OEt}_2$  (28  $\mu\text{L}$ , 220  $\mu\text{mol}$ ). The reaction mixture was stirred for 6 hr at room temperature, diluted with water and extracted with  $\text{CH}_2\text{Cl}_2$ . The organic layer was dried over  $\text{Na}_2\text{SO}_4$  and evaporated to dryness. The residue was purified by column chromatography (silica gel,  $\text{AcOEt}/n$ -hexane) to afford **23** (53 mg, 93.7  $\mu\text{mol}$ , 87%).

<sup>1</sup>H NMR (300 MHz,  $\text{CDCl}_3$ ):  $\delta$  1.48 (s, 9H), 2.73 (s, 3H), 2.82 (t,  $J = 8.1$  Hz, 2H), 3.10 (t,  $J = 5.1$  Hz, 4H), 3.30 (t,  $J = 8.1$  Hz, 2H), 3.56 (t,  $J = 5.1$  Hz, 4H), 4.00 (s, 2H), 6.65 (s, 1H), 6.70 (s, 1H), 6.77 (dd,  $J = 8.7, 2.1$  Hz, 1H), 6.88 (d,  $J = 8.7$  Hz, 1H), 7.13 (d,  $J = 2.1$  Hz, 1H); <sup>13</sup>C NMR (75 MHz,  $\text{CDCl}_3$ )  $\delta$  28.3, 28.4, 36.0, 40.4, 49.1, 56.2, 80.0, 110.8, 115.6, 120.3, 123.1, 125.4, 126.1,

127.5, 130.2, 130.8, 131.2, 150.5, 153.1, 154.7; HRMS (ESI<sup>+</sup>) Calcd for [M+H]<sup>+</sup>, 566.0841, Found, 566.0850 (+0.9 mmu).

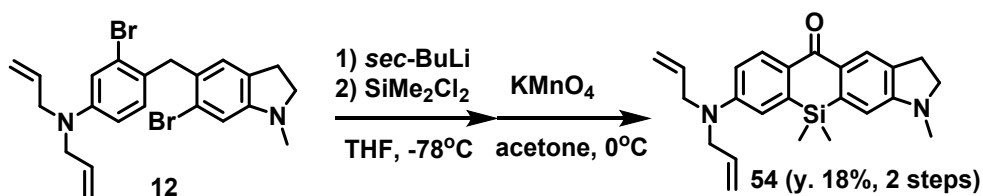

To a solution of **12** (207 mg, 0.434 mmol) in anhydrous THF (10 mL) was added 1 M THF solution of *sec*-BuLi (0.91 mL, 0.91 mmol) at  $-78^{\circ}\text{C}$  under an argon atmosphere. The reaction mixture was stirred for 20 min at the same temperature, and then dichlorodimethylsilane (112 mg, 0.868 mmol) in anhydrous THF (5 mL) was added. The mixture was warmed to room temperature and stirred for 1 hr, and 2 N HCl aq. was added to quench the reaction. The mixture was neutralized with NaHCO<sub>3</sub> aq. and extracted with CH<sub>2</sub>Cl<sub>2</sub>. The organic layer was collected, washed with brine, dried over Na<sub>2</sub>SO<sub>4</sub> and evaporated to dryness. The residue was dissolved in acetone (30 mL) at  $0^{\circ}\text{C}$  and KMnO<sub>4</sub> (275 mg, 1.74 mmol) was added in small portions over 3 hr with stirring at the same temperature. Then the mixture was filtered through a Celite filter and the solution was evaporated to dryness. The residue was purified by column chromatography (silica gel, AcOEt/*n*-hexane) to afford **54** (30 mg, 77.3  $\mu\text{mol}$ , 18%).

<sup>1</sup>H NMR (300 MHz, CDCl<sub>3</sub>):  $\delta$  0.43 (s, 6H), 2.90 (s, 3H), 3.05 (t,  $J = 8.5$  Hz, 2H), 3.47 (t,  $J = 8.5$  Hz, 2H), 4.02-4.03 (m, 4H), 5.18-5.23 (m, 4H), 5.82-5.94 (m, 2H), 6.50 (s, 1H), 6.80-6.86 (m, 2H), 8.21 (s, 1H), 8.34 (d,  $J = 9.0$  Hz, 1H); <sup>13</sup>C NMR (100 MHz, CDCl<sub>3</sub>)  $\delta$  -1.2, 28.0, 34.6, 52.7, 54.8, 107.9, 107.9, 113.4, 114.7, 116.5, 120.4, 126.0, 130.0, 131.5, 131.6, 132.1, 133.0, 140.1, 140.3, 150.0, 154.8, 185.1; HRMS (ESI<sup>+</sup>) Calcd for [M+H]<sup>+</sup>, 389.2049 Found, 389.2069 (+2.0 mmu).

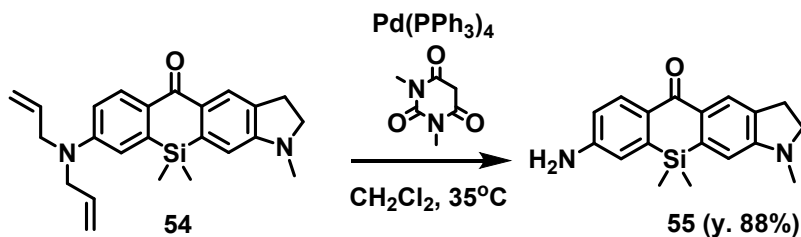

To a solution of **54** (506 mg, 1.30 mmol) in CH<sub>2</sub>Cl<sub>2</sub> (20 ml) were added 1,3-dimethylbarbituric acid (406 mg, 2.60 mmol) and Pd(PPh<sub>3</sub>)<sub>4</sub> (225 mg, 0.145 mmol) under an argon atmosphere. The reaction mixture was stirred for 19 hr at 35°C. The reaction was quenched with sat. NaHCO<sub>3</sub> aq., and the aqueous layer was extracted with CH<sub>2</sub>Cl<sub>2</sub>. The combined organic layer was washed with sat. NaHCO<sub>3</sub> aq. and brine, dried over Na<sub>2</sub>SO<sub>4</sub>, and concentrated *in vacuo*. The residue was purified by column chromatography (silica gel, AcOEt/CH<sub>2</sub>Cl<sub>2</sub>) to afford **55** (354 mg, 1.15 mmol, 88%).

<sup>1</sup>H NMR (300 MHz, CDCl<sub>3</sub>): δ 0.43 (s, 6H), 2.90 (s, 3H), 3.04 (t, *J* = 8.2 Hz, 2H), 3.47 (t, *J* = 8.2 Hz, 2H), 6.49 (s, 1H), 6.76-6.82 (m, 2H), 8.20 (s, 1H), 8.31 (d, *J* = 8.1 Hz, 1H); <sup>13</sup>C NMR (75 MHz, CDCl<sub>3</sub>) δ -1.3, 28.0, 34.4, 54.7, 107.8, 107.8, 116.1, 117.5, 126.1, 131.2, 131.8, 132.2, 140.1, 140.8, 148.8, 154.9, 185.1; HRMS (ESI<sup>+</sup>) Calcd for [M+H]<sup>+</sup>, 309.1423 Found, 389.1426 (+0.3 mmu).

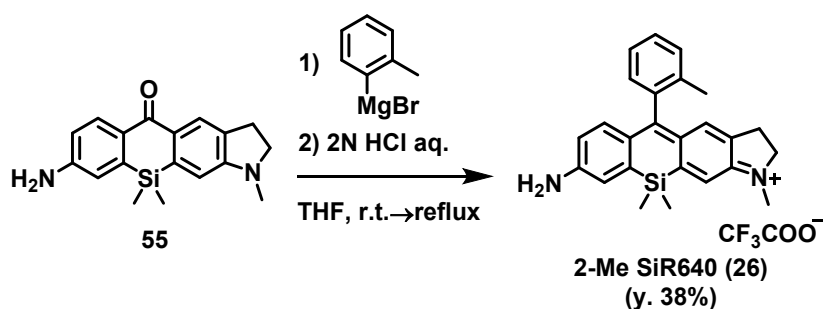

To a solution of **55** (8.7 mg, 28.2 μmol) in anhydrous THF (5 mL) was added a 1 M THF solution of *o*-tolylmagnesium bromide (2.8 mL, 2.82 mmol), and the mixture was refluxed at 80°C for 2 hr under an argon atmosphere. It was cooled to room temperature, and 2 N HCl aq. was added to it. The mixture was diluted with sat. NaHCO<sub>3</sub> aq. and extracted with CH<sub>2</sub>Cl<sub>2</sub>. The combined organic layer was washed with brine, dried over Na<sub>2</sub>SO<sub>4</sub> and concentrated *in vacuo*. The residue was purified by HPLC (eluent, 48% CH<sub>3</sub>CN/0.1% TFA aq. (0 min) to 56% CH<sub>3</sub>CN/0.1% TFA aq. (20 min); flow rate = 5.0 mL/min) to afford 2-Me SiR640 (**26**) (5.3 mg, 10.7 μmol, 38%).

<sup>1</sup>H NMR (300 MHz, CD<sub>2</sub>Cl<sub>2</sub>): δ 0.54 (s, 3H), 0.56 (s, 3H), 2.03 (s, 3H), 2.96 (t, *J* = 8.0 Hz, 2H), 3.21 (s, 3H), 3.83 (t, *J* = 8.0 Hz, 2H), 6.58 (d, *J* = 8.7 Hz, 1H), 6.79 (s, 1H), 6.91 (s, 1H), 6.95 (d, *J* = 8.7 Hz, 1H), 7.09 (d, *J* = 7.2 Hz, 1H), 7.29-7.43 (m, 4H); <sup>13</sup>C NMR (100 MHz, CD<sub>3</sub>OD) δ -1.6, -1.3, 19.4, 26.8, 33.9, 56.0, 116.3, 117.1, 123.4, 126.9, 128.6, 129.8, 129.9, 130.1, 131.3,

134.5, 135.4, 136.9, 140.7, 141.8, 147.8, 154.5, 156.6, 159.6, 168.6; HRMS (ESI<sup>+</sup>) Calcd for [M+H]<sup>+</sup>, 383.1944 Found, 383.1940 (−0.4 mmu).

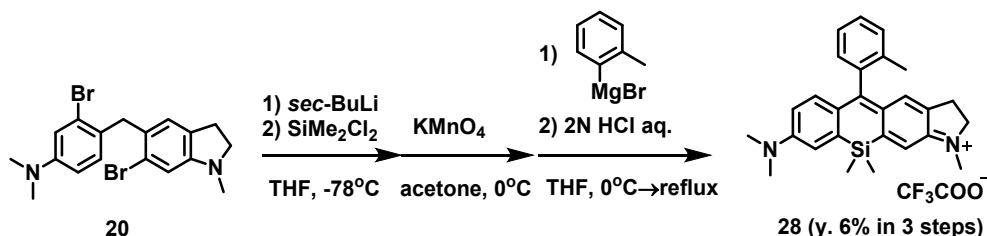

To a solution of **20** (354 mg, 0.835 mmol) in anhydrous THF (20 mL) was added a 1 M THF solution of *sec*-BuLi (1.7 mL, 1.7 mmol) at  $-78^\circ\text{C}$  under an argon atmosphere. The reaction mixture was stirred for 30 min at the same temperature, then dichlorodimethylsilane (118  $\mu\text{L}$ , 1.02 mmol) in anhydrous THF (3 mL) was added to it. The mixture was warmed to room temperature and stirred for 5 hr. Then 2 N HCl aq. was added to quench the reaction, and the mixture was neutralized with  $\text{NaHCO}_3$  aq. and extracted with  $\text{CH}_2\text{Cl}_2$ . The organic layer was collected, washed with brine, dried over  $\text{Na}_2\text{SO}_4$  and evaporated to dryness. The residue was dissolved in acetone (30 mL) at  $0^\circ\text{C}$  and  $\text{KMnO}_4$  (196 mg, 1.25 mmol) was added in small portions over 3 hr with stirring at the same temperature. Then the mixture was filtered through a Celite filter and the filtrate was evaporated to dryness. The residue was purified by column chromatography (silica gel,  $\text{AcOEt}/n\text{-hexane}$ ) and GPC. The residue (crude **56**) was dissolved in anhydrous THF (10 mL), and a 1 M THF solution of *o*-tolylmagnesium bromide (10 mL, 10 mmol) was added to it. The mixture was refluxed at  $80^\circ\text{C}$  for 5 hr under an argon atmosphere, then cooled to room temperature, and 2 N HCl aq. was added to it. The mixture was diluted with sat.  $\text{NaHCO}_3$  aq. and extracted with  $\text{CH}_2\text{Cl}_2$ . The combined organic layer was washed with brine, dried over  $\text{Na}_2\text{SO}_4$  and concentrated *in vacuo*. The residue was purified by HPLC (eluent, 52%  $\text{CH}_3\text{CN}/0.1\%$  TFA aq. (0 min) to 72%  $\text{CH}_3\text{CN}/0.1\%$  TFA aq. (20 min); flow rate = 25.0 mL/min) to afford **28** (25 mg, 47.7  $\mu\text{mol}$ , 6%).

$^1\text{H}$  NMR (400 MHz,  $\text{CD}_2\text{Cl}_2$ ):  $\delta$  0.47 (s, 3H), 0.50 (s, 3H), 1.95 (s, 3H), 2.88 (t,  $J = 7.2$  Hz, 2H), 3.14 (s, 6H), 3.18 (s, 3H), 3.80 (t,  $J = 7.2$  Hz, 2H), 6.46 (dd,  $J = 9.2, 2.0$  Hz, 1H), 6.71 (s, 1H), 6.90–6.91 (m, 2H), 7.00–7.01 (m, 2H), 7.24–7.37 (m, 3H);  $^{13}\text{C}$  NMR (100 MHz,  $\text{CD}_2\text{Cl}_2$ )  $\delta$  −1.0, −0.7, 19.7, 26.8, 34.4, 40.9, 55.7, 113.9, 115.9, 120.3, 126.3, 128.1, 129.3, 129.5, 129.8, 130.9, 134.3, 134.5, 136.4, 140.8, 146.8, 153.8, 154.3, 158.7, 168.8; HRMS (ESI<sup>+</sup>) Calcd for [M]<sup>+</sup>, 411.2257, Found, 411.2219 (−3.8 mmu).



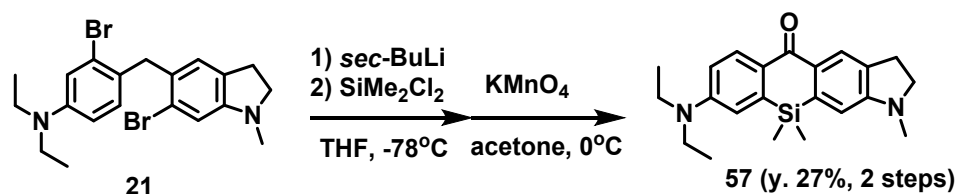

To a flame-dried flask flushed with argon were added **21** (280 mg, 0.62 mmol) and anhydrous THF (15 mL). The mixture was cooled to  $-78^\circ\text{C}$ , and 1 M *sec*-BuLi (1.86 mL, 1.86 mmol) was added to it. The solution was stirred for 20 min at the same temperature, and then dichlorodimethylsilane (157 mg, 1.22 mmol) in anhydrous THF (3 mL) was added to it. The mixture was warmed to r.t. and stirred for 2 hr. The reaction was quenched by adding 2 N HCl, and the mixture was neutralized with sat  $\text{NaHCO}_3$  aq.. The whole was extracted with  $\text{CH}_2\text{Cl}_2$ . The organic layer was dried over  $\text{Na}_2\text{SO}_4$  and evaporated to dryness. The residue was dissolved in acetone, and the solution was cooled to  $0^\circ\text{C}$ . To this solution,  $\text{KMnO}_4$  (294 mg, 1.86 mmol) was added in small portions over a period of 2 hr with stirring. Stirring was continued for another 1 hr at the same temperature, then the mixture was diluted with  $\text{CH}_2\text{Cl}_2$ , filtered through a Celite filter and evaporated to dryness. The residue was purified by column chromatography (silica gel,  $\text{AcOEt/hexane} = 3/7$ ) to give **57** (60 mg, 0.165 mmol, 27%).

$^1\text{H}$  NMR (300 MHz,  $\text{CD}_2\text{Cl}_2$ ):  $\delta$  0.46 (s, 6H), 1.24 (t,  $J = 6.6$  Hz, 6H), 2.91 (s, 3H), 3.06 (t,  $J = 8.7$  Hz, 2H), 3.44-3.50 (m, 6H), 6.61 (s, 1H), 6.76-6.82 (m, 2H), 8.23 (s, 3H), 8.37 (d,  $J = 8.7$  Hz, 1H);  $^{13}\text{C}$  NMR (100 MHz,  $\text{CD}_2\text{Cl}_2$ ):  $\delta$  -0.55, 13.2, 28.9, 35.2, 45.3, 55.6, 108.9, 113.4, 114.6, 126.5, 129.5, 132.2, 132.4, 133.2, 140.8, 141.3, 150.0, 155.8, 185.3; LRMS ( $\text{ESI}^+$ ) 365  $[\text{M}+\text{H}]^+$ .

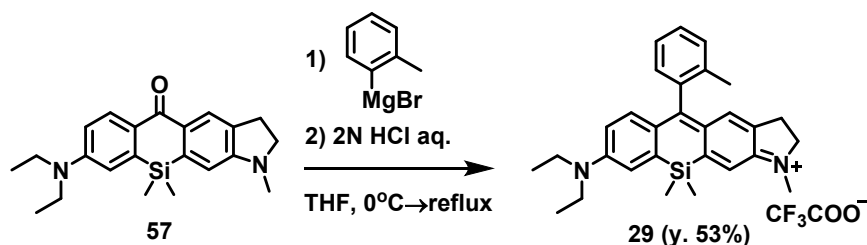

To a solution of **57** (10 mg, 27.4  $\mu\text{mol}$ ) in anhydrous THF (5 mL) was added a 1 M THF solution of *o*-tolylmagnesium bromide (10 mL, 10 mmol) and the mixture was refluxed for 5 hr under an argon atmosphere. It was cooled to room temperature, and 2 N HCl aq. was added to it.

The mixture was diluted with sat. NaHCO<sub>3</sub> aq., and extracted with CH<sub>2</sub>Cl<sub>2</sub>. The combined organic layer was washed with brine, dried over Na<sub>2</sub>SO<sub>4</sub> and concentrated *in vacuo*. The residue was purified by column chromatography (silica gel, MeOH/CH<sub>2</sub>Cl<sub>2</sub>) and HPLC (eluent, 56% CH<sub>3</sub>CN/0.1% TFA aq. (0 min) to 72% CH<sub>3</sub>CN/0.1% TFA aq. (20 min); flow rate = 5.0 mL/min) to afford **29** (8 mg, 14.5 μmol, 53%).

<sup>1</sup>H NMR (300 MHz, CD<sub>3</sub>CN): δ 0.55 (s, 3H), 0.56 (s, 3H), 1.21 (t, *J* = 7.1 Hz, 6H), 2.02 (s, 3H), 2.90 (t, *J* = 8.1 Hz, 2H), 3.23 (s, 3H), 3.58 (q, *J* = 7.1 Hz, 4H), 3.85 (t, *J* = 8.1 Hz, 2H), 6.63 (dd, *J* = 9.9, 2.6 Hz, 1H), 6.72 (s, 1H), 6.88 (d, *J* = 9.9 Hz, 1H), 7.09 (t, *J* = 7.2 Hz, 1H), 7.15 (s, 1H), 7.20 (d, *J* = 2.6 Hz, 1H), 7.34-7.48 (m, 3H); <sup>13</sup>C NMR (100 MHz, CD<sub>3</sub>OD) δ -1.5, -1.2, 13.0, 19.4, 26.9, 33.9, 46.4, 56.0, 114.5, 116.8, 121.1, 126.9, 128.2, 129.9, 130.0, 130.1, 131.3, 134.3, 135.31, 137.0, 140.6, 141.3, 147.5, 152.9, 154.1, 159.4, 168.2; HRMS (ESI<sup>+</sup>) Calcd for [M]<sup>+</sup>, 439.2570, Found, 439.2566 (−0.4 mmu).

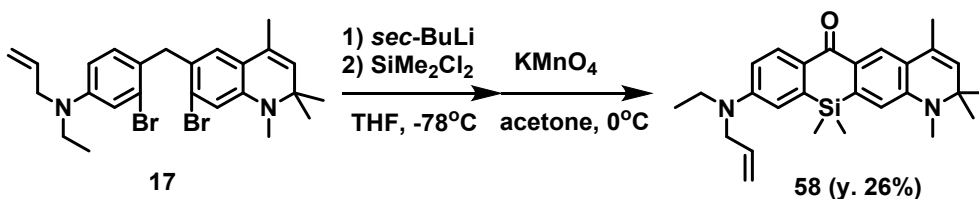

To a flame-dried flask flushed with argon were added **17** (614 mg, 1.19 mmol) and anhydrous THF (15 mL). The mixture was cooled to −78 °C, and 1 M *sec*-BuLi (3.6 mL, 3.6 mmol) was added. The solution was stirred for 20 min at the same temperature. Dichlorodimethylsilane (302 mg, 2.38 mmol) in anhydrous THF (3 mL) was added to it, then the mixture was warmed to r.t., and stirred for 2 hr. The reaction was quenched by adding 2 N HCl, and the mixture was neutralized with sat. NaHCO<sub>3</sub> aq. The whole was extracted with CH<sub>2</sub>Cl<sub>2</sub>. The organic layer was dried over Na<sub>2</sub>SO<sub>4</sub> and evaporated to dryness. The residue was dissolved in acetone, and the solution was cooled to 0°C. To this solution, KMnO<sub>4</sub> (940 mg, 5.95 mmol) was added in small portions over a period of 2 hr with stirring. Stirring was continued for another 1 hr at the same temperature, then the mixture was diluted with CH<sub>2</sub>Cl<sub>2</sub>, filtered through a Celite filter and evaporated to dryness. The residue was purified by column chromatography (silica gel, AcOEt/hexane = 3/7) to give **58** (134 mg, 0.311 mmol, 26 %).

<sup>1</sup>H NMR (300 MHz, CDCl<sub>3</sub>): δ 0.45 (s, 6H), 1.24 (t, *J* = 7.2 Hz, 3H), 1.38 (s, 6H), 2.09 (s, 3H), 2.94 (s, 3H), 3.49 (q, *J* = 7.2 Hz, 2H), 4.00-4.02 (m, 2H), 5.18-5.23 (m, 2H), 5.33 (s, 1H), 5.82-

5.94 (m, 1H), 6.58 (s, 1H), 6.79 (d,  $J = 3.0$  Hz, 1H), 6.82 (dd,  $J = 3.0, 8.7$  Hz, 1H), 8.19 (s, 1H), 8.37 (d,  $J = 8.7$  Hz, 1H);  $^{13}\text{C}$  NMR (75 MHz,  $\text{CDCl}_3$ ):  $\delta$  -1.1, 12.4, 18.7, 28.5, 30.9, 44.8, 52.4, 57.1, 112.4, 112.9, 114.2, 116.3, 123.3, 124.8, 128.0, 129.4, 129.6, 129.8, 131.6, 133.3, 140.4, 140.7, 146.8, 149.5, 185.0; HRMS (ESI<sup>+</sup>): Calcd for  $[\text{M}+\text{H}]^+$ , 431.2529; found, 431.2503 (-1.5 mmu).

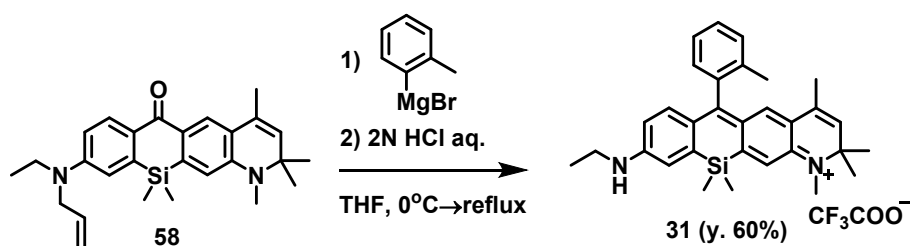

To a solution of **58** (20 mg, 46.4  $\mu\text{mol}$ ) in anhydrous THF (5 mL) was added a 1 M THF solution of  $o$ -tolylmagnesium bromide (10 mL, 10 mmol) and the mixture was refluxed at  $65^\circ\text{C}$  for 13 hr under an argon atmosphere. It was then cooled to room temperature, and 2 N HCl aq. was added to it. The mixture was diluted with sat.  $\text{NaHCO}_3$  aq. and extracted with  $\text{CH}_2\text{Cl}_2$ . The combined organic layer was washed with brine, dried over  $\text{Na}_2\text{SO}_4$  and concentrated *in vacuo*. The residue was purified by HPLC (eluent, 48%  $\text{CH}_3\text{CN}/0.1\%$  TFA aq. (0 min) to 80%  $\text{CH}_3\text{CN}/0.1\%$  TFA aq. (20 min); flow rate = 25.0 mL/min) to afford **31** (16 mg, 27.6  $\mu\text{mol}$ , 60%).  $^1\text{H}$  NMR (400 MHz,  $\text{CDCl}_3$ ):  $\delta$  0.54 (s, 3H), 0.55 (s, 3H), 1.35 (t,  $J = 7.2$  Hz, 3H), 1.43 (s, 3H), 1.45 (s, 3H), 1.51 (s, 3H), 2.05 (s, 3H), 3.14 (s, 3H), 3.47 (q,  $J = 7.2$  Hz, 2H), 5.29 (s, 1H), 6.63 (s, 1H), 6.85 (s, 1H), 7.06-7.08 (m, 2H), 7.27-7.42 (m, 5H);  $^{13}\text{C}$  NMR (100 MHz,  $\text{CDCl}_3$ )  $\delta$  -1.4, -1.1, 13.9, 17.6, 19.4, 29.3, 32.1, 38.4, 59.4, 112.5, 115.5, 117.7, 118.4, 122.4, 125.6, 126.3, 127.5, 128.7, 128.9, 129.8, 130.1, 131.4, 135.7, 138.8, 148.2, 149.1, 156.0, 161.1, 161.4, 167.4; HRMS (ESI<sup>+</sup>) Calcd for  $[\text{M}]^+$ , 465.2726, Found, 465.2676 (-4.1 mmu).

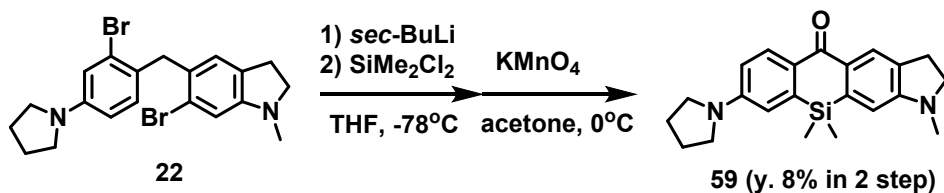

To a solution of **22** (336 mg, 0.747 mmol) in anhydrous THF (25 mL) was added a 1 M THF solution of *sec*-BuLi (1.64 mL, 1.64 mmol) at  $-78^{\circ}\text{C}$  under an argon atmosphere. The reaction mixture was stirred for 20 min at the same temperature, then dichlorodimethylsilane (134  $\mu\text{L}$ , 1.12 mmol) in anhydrous THF (5 mL) was added to it. The mixture was warmed to room temperature and stirred for 2 hr, then 2 N HCl aq. was added to quench the reaction, and the mixture was neutralized with  $\text{NaHCO}_3$  aq. The whole was extracted with  $\text{CH}_2\text{Cl}_2$ . The organic layer was collected, washed with brine, dried over  $\text{Na}_2\text{SO}_4$  and evaporated to dryness. The residue was dissolved in acetone (30 mL) at  $0^{\circ}\text{C}$ , and  $\text{KMnO}_4$  (472 mg, 2.99 mmol) was added in small portions over 2 hr with stirring at the same temperature. The mixture was filtered through Celite and the filtrate was evaporated to dryness. The residue was purified by column chromatography (silica gel,  $\text{CH}_2\text{Cl}_2/n$ -hexane) to afford **59** (21 mg, 58.0  $\mu\text{mol}$ , 8%).

$^1\text{H}$  NMR (300 MHz,  $\text{CDCl}_3$ ):  $\delta$  0.45 (s, 6H), 2.03-2.07 (m, 4H), 2.90 (s, 3H), 3.05 (t,  $J = 8.0$  Hz, 2H), 3.39-3.50 (m, 6H), 6.51 (s, 1H), 6.64 (d,  $J = 2.1$  Hz, 1H), 6.69 (dd,  $J = 8.1, 2.1$  Hz, 1H), 8.22 (s, 1H), 8.39 (d,  $J = 8.1$  Hz, 1H);  $^{13}\text{C}$  NMR (100 MHz,  $\text{CDCl}_3$ )  $\delta$  25.5, 28.1, 34.6, 47.5, 54.8, 108.0, 113.1, 114.1, 126.0, 129.1, 131.6, 131.8, 132.1, 140.1, 140.5, 149.0, 154.8, 185.2; LRMS ( $\text{ESI}^+$ ) 363  $[\text{M}+\text{H}]^+$ .

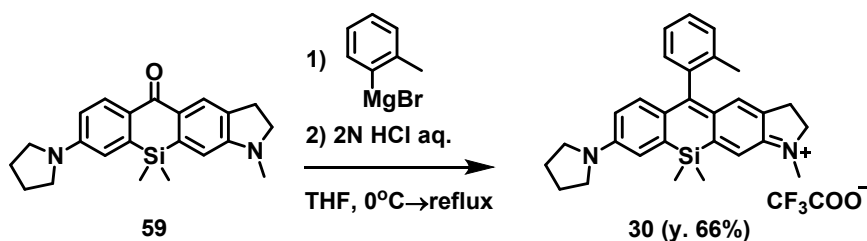

To a solution of **59** (15 mg, 41.4  $\mu\text{mol}$ ) in anhydrous THF (20 mL) was added a 1 M THF solution of *o*-tolylmagnesium bromide (1 mL, 1 mmol) and the mixture was refluxed for 4 hr under an argon atmosphere. It was cooled to room temperature, and 2 N HCl aq. was added to it. The mixture was diluted with sat.  $\text{NaHCO}_3$  aq. and extracted with  $\text{CH}_2\text{Cl}_2$ . The combined organic layer was washed with brine, dried over  $\text{Na}_2\text{SO}_4$  and concentrated *in vacuo*. The residue was purified by HPLC (eluent, 64%  $\text{CH}_3\text{CN}/0.1\%$  TFA aq. (0 min) to 80%  $\text{CH}_3\text{CN}/0.1\%$  TFA aq. (20 min); flow rate = 5.0 mL/min) to afford **30** (15 mg, 27.3  $\mu\text{mol}$ , 66%).

$^1\text{H}$  NMR (400 MHz,  $\text{CD}_2\text{Cl}_2$ ):  $\delta$  0.55 (s, 3H), 0.57 (s, 3H), 2.03 (s, 3H), 2.10 (t,  $J = 6.9$  Hz, 4H), 2.96 (t,  $J = 7.2$  Hz, 2H), 3.24 (s, 3H), 3.57 (t,  $J = 6.9$  Hz, 4H), 3.86 (t,  $J = 7.2$  Hz, 2H), 6.44 (dd,  $J = 9.2, 2.4$  Hz, 1H), 6.78 (s, 1H), 6.93 (s, 1H), 6.98-7.00 (m, 2H), 7.09 (d,  $J = 7.2$  Hz, 1H), 7.33-

7.46 (m, 3H);  $^{13}\text{C}$  NMR (100 MHz,  $\text{CD}_2\text{Cl}_2$ )  $\delta$  -1.0, -0.7, 19.7, 25.8, 26.8, 34.2, 49.3, 55.6, 114.8, 115.4, 121.4, 126.3, 128.1, 129.3, 129.5, 129.6, 130.9, 134.0, 136.4, 139.8, 141.2, 147.4, 151.6, 153.5, 158.4, 168.9; HRMS ( $\text{ESI}^+$ ) Calcd for  $[\text{M}]^+$ , 437.2413, Found, 437.2387 (-2.6 mmu).

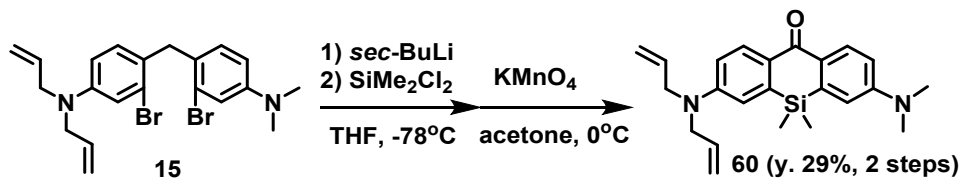

To a solution of **15** (19.9 g, 43.0 mmol) in anhydrous THF (120 mL) in a flame-dried flask was added a 1 M THF solution of *sec*-BuLi (120 mL, 120 mmol) at  $-78^\circ\text{C}$  under an argon atmosphere. The reaction mixture was stirred for 20 min at the same temperature, and then dichlorodimethylsilane (5.8 mL, 60 mmol) in anhydrous THF (40 mL) was slowly added to it. The mixture was warmed to room temperature and stirred for 1 hr, then 2 N HCl aq. was added to quench the reaction, and the mixture was neutralized with sat.  $\text{NaHCO}_3$  aq. The whole was extracted with  $\text{CH}_2\text{Cl}_2$ . The organic layer was collected, washed with brine, dried over  $\text{Na}_2\text{SO}_4$  and evaporated to dryness. The residue was dissolved in acetone (300 mL) at  $0^\circ\text{C}$  and  $\text{KMnO}_4$  (19.4 g, 123 mmol) was added in small portions over 2 hr with stirring at the same temperature. The mixture was stirred for a further 1 hr at room temperature, filtered and evaporated to dryness. The residue was purified by column chromatography (silica gel,  $\text{CH}_2\text{Cl}_2$ ) to afford **60** (4.68 g, 12.4 mmol, 29%).

$^1\text{H}$ -NMR (300 MHz,  $\text{CDCl}_3$ ):  $\delta$  = 0.44 (s, 6H), 3.09 (s, 6H), 4.03 (d, 4H,  $J$  = 4.4 Hz), 5.18-5.30 (m, 4H), 5.82-5.95 (m, 2H), 6.78-6.85 (m, 4H), 8.36 (d, 1H,  $J$  = 8.7 Hz), 8.39 (d, 1H,  $J$  = 9.0 Hz);  $^{13}\text{C}$ -NMR (75 MHz,  $\text{CDCl}_3$ ):  $\delta$  = -1.1, 40.0, 52.6, 113.1, 113.4, 114.2, 114.7, 116.5, 129.6, 129.9, 131.6, 133.0, 140.4, 150.1, 151.4, 185.1; HRMS ( $\text{ESI}^+$ ): Calcd for  $[\text{M}+\text{H}]^+$ , 377.2049, Found, 377.2019 (-3.0 mmu).

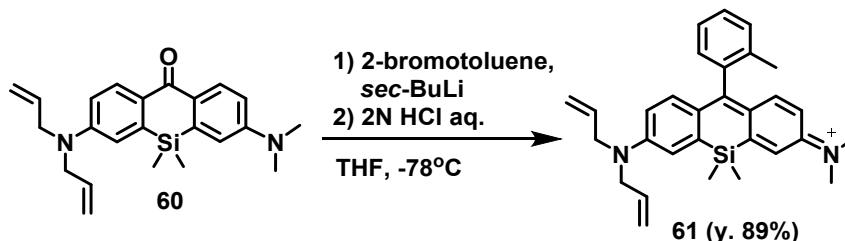

To a flame-dried flask flushed with argon was added a solution of 2-bromotoluene (14 mL, 110 mmol) in anhydrous THF (50 mL). The mixture was cooled to  $-78^{\circ}\text{C}$ , and then a 1 M THF solution of *sec*-BuLi (100 mL, 100 mmol) was added at  $-78^{\circ}\text{C}$  under an argon atmosphere. The reaction mixture was stirred for 20 min at the same temperature, and then a solution of **60** (930 mg, 2.47 mmol) in anhydrous THF (30 mL) was slowly added to it. The mixture was warmed to room temperature and stirred for 1 h, then 2 N HCl aq. (80 mL) was added, and the whole was extracted with  $\text{CH}_2\text{Cl}_2$ . The combined organic layer was washed with brine, dried over  $\text{Na}_2\text{SO}_4$  and evaporated to dryness. The residue was purified by column chromatography (silica gel, MeOH/ $\text{CH}_2\text{Cl}_2$ , 1/19  $\rightarrow$  1/4) to afford **61** (1.07 g, 2.20 mmol, 89%).

$^1\text{H}$ -NMR (300 MHz,  $\text{CDCl}_3$ ):  $\delta$  = 0.61 (s, 3H), 0.63 (s, 3H), 2.04 (s, 3H), 3.49 (s, 6H), 4.21 (d, 4H,  $J$  = 5.1 Hz), 5.19–5.32 (m, 4H), 5.82–5.95 (m, 2H), 6.11 (dd, 1H,  $J$  = 1.5 Hz, 9.6 Hz), 6.69 (dd, 1H,  $J$  = 1.5 Hz, 10.2 Hz), 7.07 (d, 1H,  $J$  = 9.6 Hz), 7.11–7.14 (m, 2H), 7.29 (d, 1H,  $J$  = 3.0 Hz), 7.35–7.49 (m, 4H);  $^{13}\text{C}$ -NMR (100 MHz,  $\text{CDCl}_3$ ):  $\delta$  =  $-1.1$ ,  $-0.8$ , 19.4, 41.6, 53.6, 114.0, 114.5, 118.1, 120.6, 121.7, 125.6, 127.6, 128.0, 128.8, 128.9, 130.2, 130.4, 130.8, 135.6, 138.3, 141.0, 142.2, 147.7, 153.2, 154.7, 170.0; HRMS (ESI $^{+}$ ): Calcd for  $[\text{M}]^{+}$ , 451.2569, Found, 451.2541 ( $-2.8$  mmu).

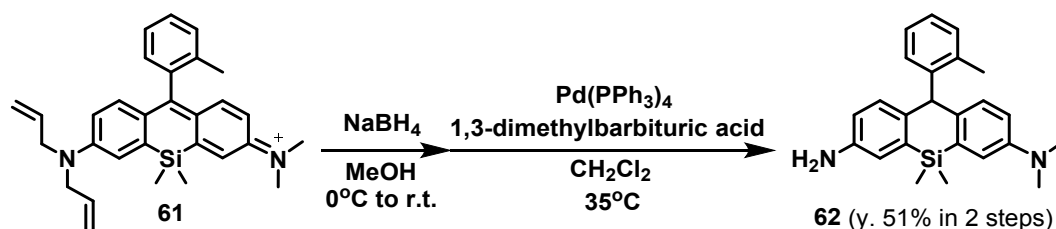

Compound **61** (1.15 g, 2.36 mmol) was dissolved in MeOH (100 mL). The solution was cooled to  $0^{\circ}\text{C}$ , and  $\text{NaBH}_4$  (367 mg, 9.72 mmol) was added to it. The reaction mixture was stirred for 30 min, washed with sat.  $\text{NaHCO}_3$  aq. and brine, dried over  $\text{Na}_2\text{SO}_4$  and evaporated to dryness. The residue was partially purified by column chromatography (silica gel, ethyl acetate/*n*-hexane 1/4) to provide crude reduced **61** (785 mg). To a flame-dried flask flushed with argon were added  $\text{Pd(PPh}_3)_4$  (213 mg, 0.184 mmol) and 1,3-dimethylbarbituric acid (943 mg, 6.04 mmol). The crude reduced **61** in  $\text{CH}_2\text{Cl}_2$  (50 mL) was then added to this flask, and the mixture was stirred at  $35^{\circ}\text{C}$  for 11 hr, and evaporated to dryness. The residue was suspended in sat.  $\text{NaHCO}_3$  aq., and extracted with  $\text{CH}_2\text{Cl}_2$ . The combined organic layer was dried over  $\text{Na}_2\text{SO}_4$  and evaporated to dryness. The

residue was purified by column chromatography (silica gel, ethyl acetate/*n*-hexane 1/9 → 1/4) to obtain **62** (450 mg, 1.21 mmol, 51% in 2 steps).

<sup>1</sup>H-NMR (300 MHz, CD<sub>3</sub>OD): δ = 0.37 (s, 3H), 0.54 (s, 3H), 2.17 (s, 3H), 2.88 (s, 6H), 5.50 (s, 1H), 6.60 (dd, *J* = 8.4 Hz, 2.6 Hz, 1H), 6.69 (dd, *J* = 8.8 Hz, 2.9 Hz, 1H), 6.78 (d, *J* = 8.8 Hz, 1H), 6.86 (d, *J* = 8.7 Hz, 1H), 6.97–7.09 (m, 6H); <sup>13</sup>C-NMR (75 MHz, CDCl<sub>3</sub>): δ = -1.0, -0.3, 20.5, 40.7, 49.9, 114.6, 116.3, 116.9, 119.0, 125.8, 126.1, 129.8, 130.1, 131.0, 131.1, 133.6, 134.4, 135.5, 137.2, 139.2, 143.3, 146.0, 147.9; HRMS (ESI<sup>+</sup>): Calcd for [M+H]<sup>+</sup>, 373.2100, Found, 373.2071 (-2.9 mmu).

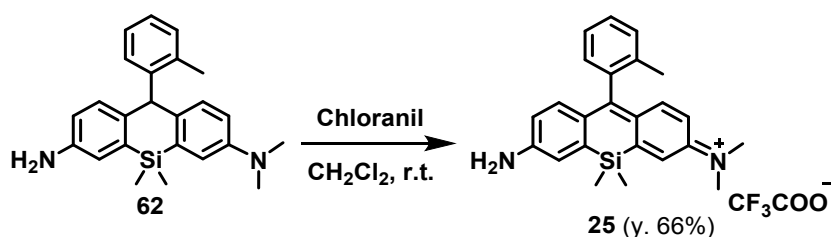

Compound **62** (121 mg, 0.324 mmol) and chloranil (159 mg, 0.647 mmol) were dissolved in CH<sub>2</sub>Cl<sub>2</sub> (10 mL), and the mixture was stirred for 30 min. The solution was evaporated to dryness and the residue was purified by HPLC (eluent, 16% CH<sub>3</sub>CN/0.1% TFA aq. (0 min) to 80% CH<sub>3</sub>CN/0.1% TFA aq. (25 min); flow rate = 5.0 mL/min) to afford **25** (103 mg, 0.213 mmol, 66 %).

<sup>1</sup>H NMR (300 MHz, CD<sub>3</sub>OD): δ = 0.55 (s, 3H), 0.56 (s, 3H), 2.04 (s, 3H), 3.34 (s, 6H), 6.58 (dd, 1H, *J* = 2.1 Hz, 9.6 Hz), 6.76 (dd, 1H, *J* = 3.0 Hz, 9.6 Hz), 7.02 (d, 1H, 9.6 Hz), 7.07–7.13 (m, 2H), 7.20 (d, 1H, *J* = 2.1 Hz), 7.36–7.49 (m, 4H); <sup>13</sup>C NMR (75 MHz, CDCl<sub>3</sub>): δ = -1.6, -1.3, 19.3, 40.4, 113.1, 117.5, 119.3, 125.5, 125.5, 127.4, 127.8, 128.7, 128.9, 130.1, 135.6, 138.6, 140.2, 143.5, 146.9, 150.1, 153.0, 158.1, 169.1; HRMS (ESI<sup>+</sup>): Calcd for [M]<sup>+</sup>, 371.1944, Found, 371.1974 (+3.1 mmu).

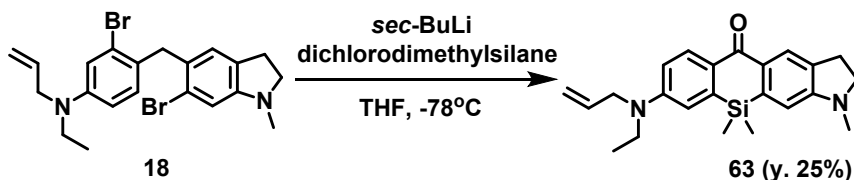

To a flame-dried flask flushed with argon were added **18** (825 mg, 1.79 mmol) and anhydrous THF (15 mL). The mixture was cooled to -78 °C, and 1 M *sec*-BuLi (4.3 mL, 4.3 mmol) was

added to it. The solution was stirred for 20 min at the same temperature, and dichlorodimethylsilane (455 mg, 3.58 mmol) in anhydrous THF (3 mL) was added. The mixture was warmed to r.t. and stirred for 2 hr, then the reaction was quenched by adding 2 N HCl. The mixture was neutralized with sat. NaHCO<sub>3</sub> aq., and extracted with CH<sub>2</sub>Cl<sub>2</sub>. The organic layer was dried over Na<sub>2</sub>SO<sub>4</sub> and evaporated to dryness. The residue was dissolved in acetone, and the solution was cooled to 0 °C. To this solution, KMnO<sub>4</sub> (1.414 g, 8.95 mmol) was added in small portions over a period of 2 hr with stirring. Stirring was continued for another 1 hr at the same temperature, then the mixture was diluted with CH<sub>2</sub>Cl<sub>2</sub>, filtered through a Celite filter, and evaporated to dryness. The residue was purified by column chromatography (silica gel, AcOEt/hexane = 3/7) to give **63** (170 mg, 0.451 mmol, 25%).

<sup>1</sup>H NMR (300 MHz, CD<sub>3</sub>CN): δ 0.29 (s, 6H), 0.97 (t, *J* = 6.6 Hz, 3H), 2.65 (s, 3H), 2.79 (t, *J* = 8.1 Hz, 2H), 3.22 (t, *J* = 8.1 Hz, 2H), 3.28 (q, *J* = 6.6 Hz, 2H), 3.81 (d, *J* = 5.4 Hz, 2H), 4.91-4.97 (m, 2H), 5.61-5.74 (m, 1H), 6.42 (s, 1H), 6.59 (dd, *J* = 3.0, 8.7 Hz, 1H), 6.65 (d, *J* = 3.0 Hz, 1H), 7.83 (s, 1H), 7.95 (d, *J* = 8.7 Hz, 1H); <sup>13</sup>C NMR (75 MHz, CD<sub>3</sub>CN): δ -1.2, 12.6, 28.6, 34.7, 45.6, 52.9, 55.3, 109.3, 113.9, 115.4, 116.3, 126.2, 129.9, 131.9, 132.1, 133.4, 134.9, 141.0, 141.3, 150.5, 156.1, 185.0; HRMS (ESI<sup>+</sup>): Calcd for [M+H]<sup>+</sup>, 377.2049; found, 377.2051 (+0.2 mmu).

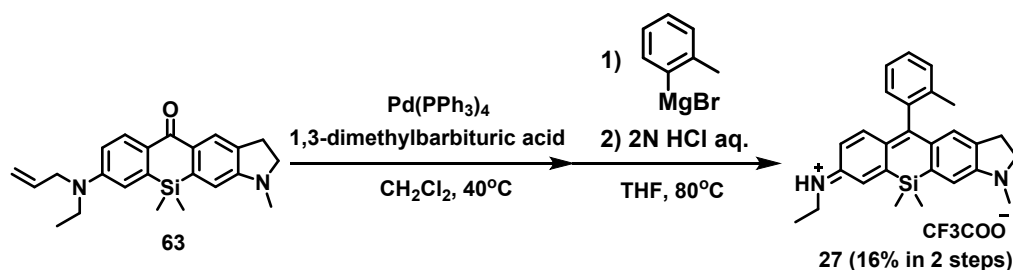

Compound **63** (183 mg, 0.5 mmol) and 1,3-dimethylbarbituric acid (312 mg, 2.0 mmol) were dissolved in CH<sub>2</sub>Cl<sub>2</sub> under an Ar atmosphere. Pd(PPh<sub>3</sub>)<sub>4</sub> (115 mg, 0.1 mmol) was added under Ar. The mixture was stirred for 18 hr at 40°C, and then evaporated to dryness. The residue was partially purified by column chromatography (silica gel, CH<sub>2</sub>Cl<sub>2</sub>) to give crude deprotected **63** (153 mg, 91%). HRMS (ESI<sup>+</sup>): Calcd for [M+H]<sup>+</sup>, 337.1736; found, 337.1738 (+0.2 mmu). To a flame-dried flask flushed with argon were added crude deprotected **63** (34 mg, 0.1 mmol) and anhydrous THF (5 mL). The solution was heated to 80°C, and 1 M *o*-tolylmagnesium bromide (3 mL) was added. The mixture was stirred for 2 hr, then cooled to r.t., and the reaction was quenched by addition of 2 N HCl. Stirring was continued at r.t. for 15 min, then the mixture was extracted



with CH<sub>2</sub>Cl<sub>2</sub>. The organic layer was dried over Na<sub>2</sub>SO<sub>4</sub> and evaporated to dryness. Purification of the residue by HPLC (eluent, a 20-min linear gradient, from 20 % to 100 % solvent B; flow rate, 5.0 ml/min; detection wavelength, 680 nm) provided **27** (6.8 mg, 16% in 2 steps).

<sup>1</sup>H NMR (300 MHz, CDCl<sub>3</sub>): δ 0.52 (s, 3H), 0.54 (s, 3H), 1.33 (t, *J* = 6.6 Hz, 3H), 2.04 (s, 3H), 2.94 (t, *J* = 8.1 Hz, 2H), 3.17 (s, 3H), 3.42 (q, *J* = 6.6 Hz, 2H), 3.78 (t, *J* = 8.1 Hz, 2H), 6.50 (d, *J* = 8.7 Hz, 1H), 6.70 (s, 1H), 6.80 (s, 1H), 6.97 (d, *J* = 9.0 Hz, 1H), 7.06 (d, *J* = 7.2 Hz, 1H), 7.30-7.35 (m, 3H), 7.45 (t, *J* = 8.7 Hz, 1H); <sup>13</sup>C NMR (100 MHz, CDCl<sub>3</sub>): δ -1.5, -1.2, 13.9, 19.5, 26.6, 33.7, 38.3, 54.6, 113.6, 125.7, 127.5, 128.7, 128.7, 129.0, 130.3, 132.5, 133.0, 135.8, 139.3, 142.5, 147.2, 150.9, 155.0, 156.9, 167.6; HRMS (ESI<sup>+</sup>): Calcd for [M]<sup>+</sup>, 411.2257; Found, 411.2228 (−2.8 mmu).

**Scheme S3.** Synthesis of azoSiR640.

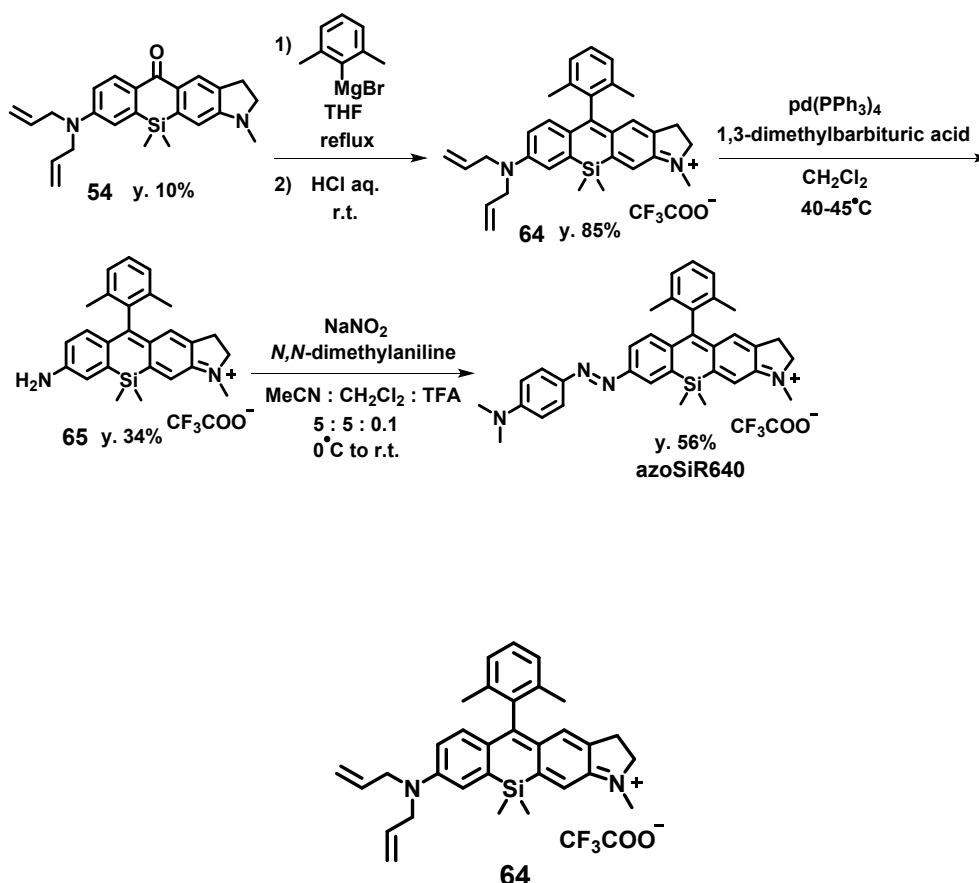

To a solution of **54** (160 mg, 412 μmol) in anhydrous THF (20 mL) was added a 1 M THF solution of 2,6-dimethylphenylmagnesium bromide (4.1 mL, 4.1 mmol) and the mixture was

refluxed at 80°C for 2 hr under an argon atmosphere. Another portion of the Grignard reagent (1 M THF solution of 2,6-dimethylphenylmagnesium bromide; 2.0 mL, 2.0 mmol) was further added and the mixture was refluxed at 90°C for 5 hr. It was cooled to room temperature, and 2 N HCl was added to it. The resulting mixture was diluted with H<sub>2</sub>O, and extracted with CH<sub>2</sub>Cl<sub>2</sub>. The organic layer was collected, washed with brine, dried over Na<sub>2</sub>SO<sub>4</sub> and evaporated to dryness. The residue was purified by HPLC (gradient, A/B = 60/40 to 0/100, 15 min) to afford **64** as a blue solid (206 mg, 349 μmol, 85%).

<sup>1</sup>H NMR (400 MHz, CD<sub>3</sub>OD): δ 0.55 (s, 6H), 1.99 (s, 6H), 2.99 (t, *J* = 7.2 Hz, 2H), 3.21 (s, 3H), 3.97 (t, *J* = 7.2 Hz, 2H), 4.10 (d, *J* = 4.8 Hz, 4H), 5.20 (d, *J* = 17.2 Hz, 2H), 5.29 (d, *J* = 10.4 Hz, 2H), 5.85 (m, 2H), 6.52 (dd, *J* = 9.6, 2.8 Hz, 1H), 6.75 (s, 1H), 6.93 (d, *J* = 9.6 Hz, 1H), 7.04 (d, *J* = 2.8 Hz, 1H), 7.14 (s, 1H), 7.17 (d, *J* = 7.6 Hz, 2H), 7.32 (t, *J* = 7.6 Hz, 1H); <sup>13</sup>C NMR (75 MHz, CD<sub>3</sub>OD): δ -1.5, 19.7, 25.9, 34.2, 53.2, 55.3, 113.8, 116.6, 117.8, 119.6, 127.4, 127.6, 128.5, 128.9, 131.1, 132.9, 134.5, 135.6, 138.3, 138.6, 145.3, 151.9, 154.4, 158.6, 167.2; LRMS (ESI<sup>+</sup>): [M]<sup>+</sup>, 477.

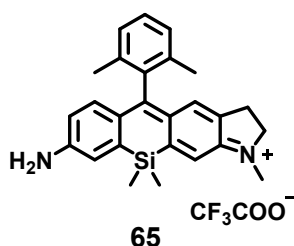

To a solution of **64** (83.6 mg, 142 μmol) in CH<sub>2</sub>Cl<sub>2</sub> (20 mL) were added 1,3-dimethylbarbituric acid (81.9 mg, 525 μmol) and Pd(PPh<sub>3</sub>)<sub>4</sub> (202 mg, 175 μmol), and the mixture was stirred for 17.5 hr at 40 °C under an argon atmosphere. It was cooled to room temperature, and H<sub>2</sub>O was added to it. The aqueous layer was extracted with CH<sub>2</sub>Cl<sub>2</sub>. The organic layer was collected, dried over Na<sub>2</sub>SO<sub>4</sub> and evaporated to dryness. The residue was purified by column chromatography (NH silica gel, CH<sub>2</sub>Cl<sub>2</sub>/MeOH = 98/2 to 94/6) and then HPLC (gradient, A/B = 70/30 to 0/100, 25 min) to afford **2,6-diMe SiR640 (65)** as a blue solid (24.2 mg, 47.4 μmol, 34%).

<sup>1</sup>H NMR (300 MHz, CDCl<sub>3</sub>): δ 0.53 (s, 6H), 1.98 (s, 6H), 2.97 (t, *J* = 8.1 Hz, 2H), 3.24 (s, 3H), 3.85 (t, *J* = 8.1 Hz, 2H), 6.53 (dd, *J* = 9.0, 2.4 Hz, 1H), 6.75 (s, 1H), 6.89 (s, 1H), 6.92 (d, *J* = 9.0 Hz, 1H), 7.16 (d, *J* = 7.6 Hz, 2H), 7.22 (d, *J* = 2.4 Hz, 1H), 7.32 (t, *J* = 7.6 Hz, 1H); <sup>13</sup>C NMR (75 MHz, CDCl<sub>3</sub>): δ -1.7, 19.6, 26.3, 33.7, 54.7, 114.3, 116.7, 123.8, 127.4, 127.6, 128.4, 128.5,

132.4, 133.2, 135.5, 138.7, 140.9, 147.7, 152.7, 155.6, 157.6, 168.8; HRMS (ESI<sup>+</sup>): Calcd for [M]<sup>+</sup>, 397.2100, Found, 397.2096 (−0.4 mmu).

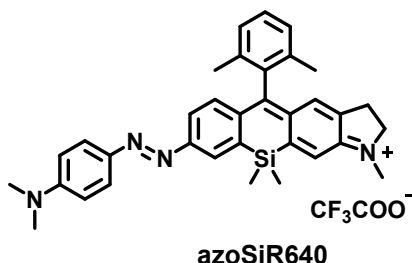

**2,6-diMe SiR640 (65)** (13.0 mg, 25.4  $\mu$ mol) was dissolved in MeCN/CH<sub>2</sub>Cl<sub>2</sub> (1 : 1, 10 mL) containing 1% TFA and the mixture was stirred at 0 °C under an argon atmosphere. NaNO<sub>2</sub> (3.6 mg, 52.5  $\mu$ mol) was added to it, and stirring was continued at 0°C for 2 min. *N,N*-Dimethylaniline (58.8  $\mu$ L, 757  $\mu$ mol) in MeCN (1 mL) was then added. After further stirring at room temperature for 1.5 hr, the mixture was diluted with H<sub>2</sub>O and extracted with CH<sub>2</sub>Cl<sub>2</sub>. The organic layer was collected, washed with brine, dried over Na<sub>2</sub>SO<sub>4</sub> and evaporated to dryness. The residue was purified by HPLC (gradient, A/B = 60/40 to 0/100, 20 min) to afford **azoSiR640** as a dark blue solid (8.9 mg, 14.2  $\mu$ mol, 56%).

<sup>1</sup>H NMR (300 MHz, CD<sub>3</sub>OD):  $\delta$  0.67 (s, 6H), 2.02 (s, 6H), 3.06 (m, 2H), 3.15 (s, 6H), 3.58 (s, 3H), 4.15 (t, *J* = 6.6 Hz, 2H), 6.87 (d, *J* = 9.6 Hz, 2H), 6.91 (s, 1H), 7.15 (d, *J* = 8.7 Hz, 1H), 7.28 (d, *J* = 7.2 Hz, 2H), 7.40 (t, *J* = 7.2 Hz, 1H), 7.68–7.72 (m, 2H), 7.89 (d, *J* = 9.6 Hz, 2H), 8.25 (d, *J* = 2.1 Hz, 1H); <sup>13</sup>C NMR (100 MHz, CD<sub>3</sub>OD):  $\delta$  −1.7, 19.9, 26.4, 35.5, 40.3, 58.1, 112.9, 122.0, 125.0, 127.2, 129.0, 129.7, 130.2, 133.8, 134.2, 135.7, 136.9, 139.6, 139.9, 140.7, 142.0, 145.4, 154.8, 155.3, 158.8, 161.4, 163.3; HRMS (ESI<sup>+</sup>): Calcd for [M]<sup>+</sup>, 529.2788, Found, 529.2743 (−4.5 mmu).

**Table S1.** Heterodimerization reaction of two anilines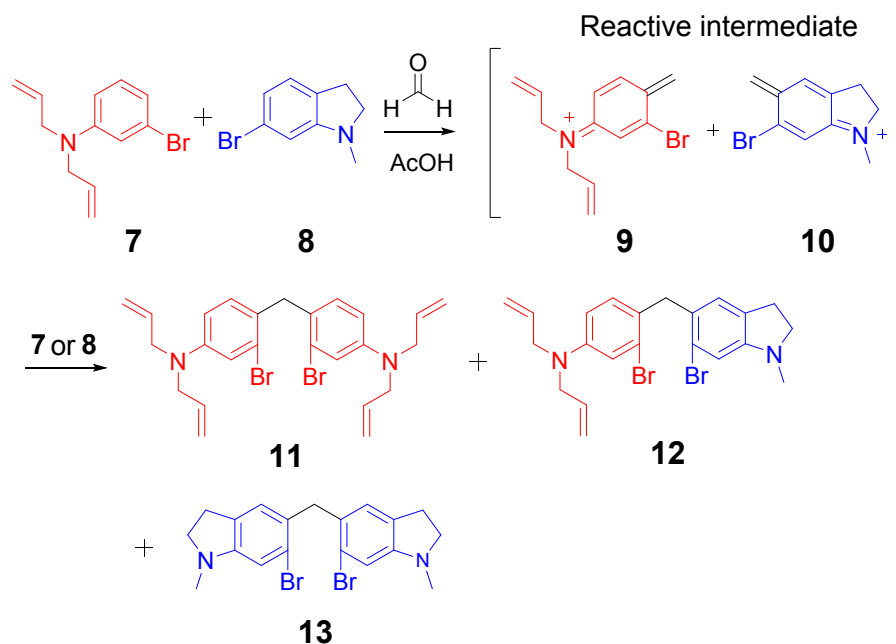

| Entry | Temp. (°C) | Time (min) | Recovery (%) |          | Conversion (%) |           |           |
|-------|------------|------------|--------------|----------|----------------|-----------|-----------|
|       |            |            | <b>7</b>     | <b>8</b> | <b>11</b>      | <b>12</b> | <b>13</b> |
| 1     | 60         | 15         | 86           | 9        | 0              | 2         | 16        |
| 2     | 80         | 90         | 11           | 0        | 13             | 0         | 0         |

Compounds **11** and **13** were identified based on the previous reports.<sup>[S6,7]</sup>

Initially, we tried to synthesize aniline heterodimers by exploring heterodimerization of allyl-protected aniline (**7**) and *N*-methylindoline (**8**) under the reaction conditions used for the synthesis of aniline homodimers.<sup>[S9]</sup> However, this reaction mainly afforded the homodimers **11** and **13** (Table S1). The use of formaldehyde (2.5 eq.) in acetic acid for 15 min at 60°C provided small amounts of homodimer **13** and heterodimer **12** (Table S1, entry 1). Under this condition, reactive **8** was thought to preferentially form the homodimer. Therefore, we performed the same reaction for 90 min at 80°C (Table S1, entry 2). However, we obtained only a small amount of homodimer **11**, probably because aniline **8** formed complex polymers consisting of **8** and **7**.

We anticipated that the reaction mechanism for aniline homodimers in Table S1 might be as follows. Formaldehyde forms *p*-hydroxymethyl aniline under the acidic condition, and then dehydration of *p*-hydroxymethyl aniline generates an electrophilic aza quinone methide (**9** or **10**),

which is thought to be the reactive intermediate. Then, another aniline (**7** or **8**) reacts with **9** or **10**, generating aniline homodimer (**11** or **13**), which can be converted to symmetrical Si-rhodamine fluorophore. So, we expected that we would be able to obtain the aniline heterodimers by forming the reactive intermediate of one of the two anilines, followed by nucleophilic attack of another aniline (see Table 1 in the manuscript).

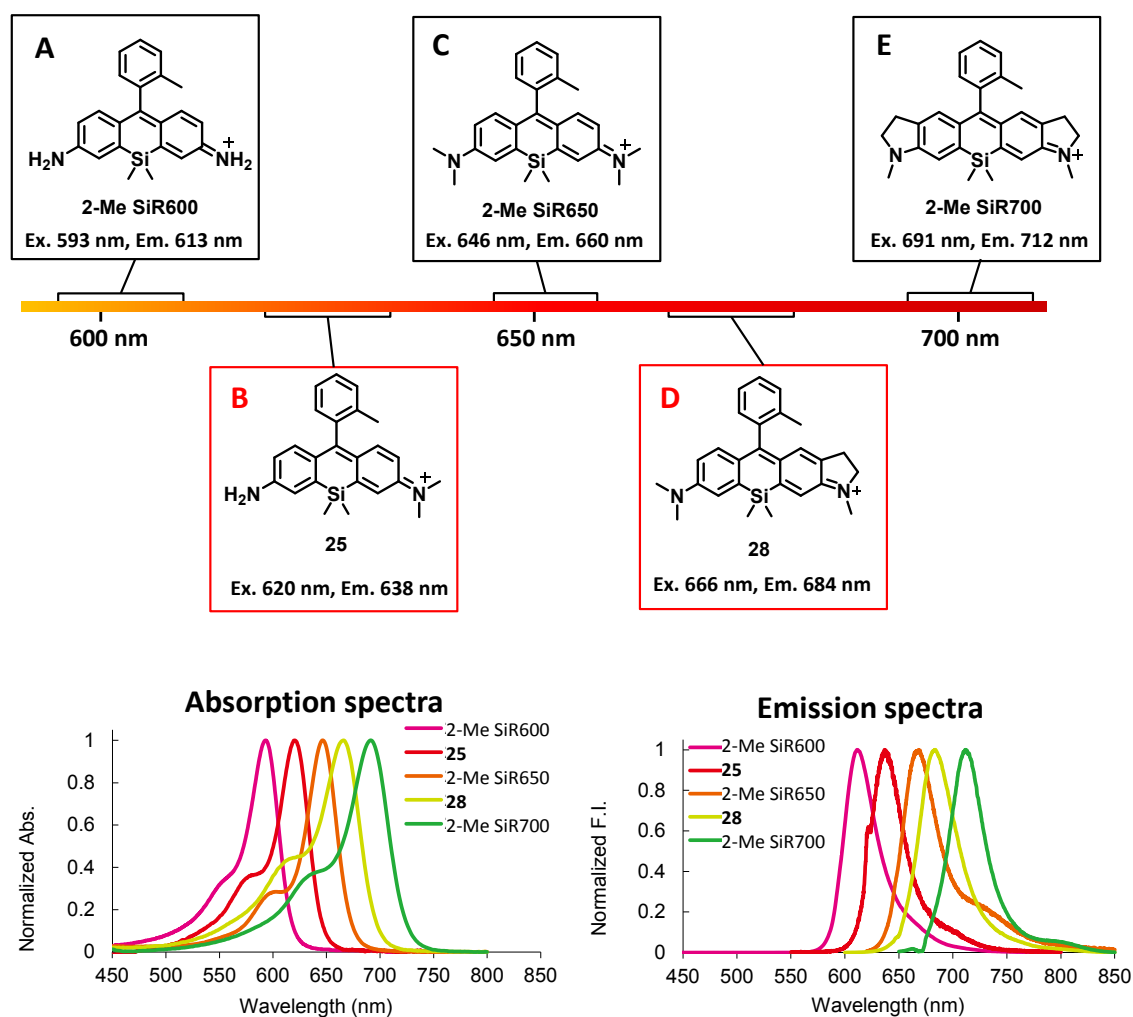

**Fig. S1** Absorption and emission wavelengths of Si-rhodamines are fine-tunable by chemically introducing alkyl groups into the xanthene moieties. Photophysical properties and spectra were measured in 100 mM sodium phosphate buffer (pH 7.4) containing 1% DMSO as a co-solvent.

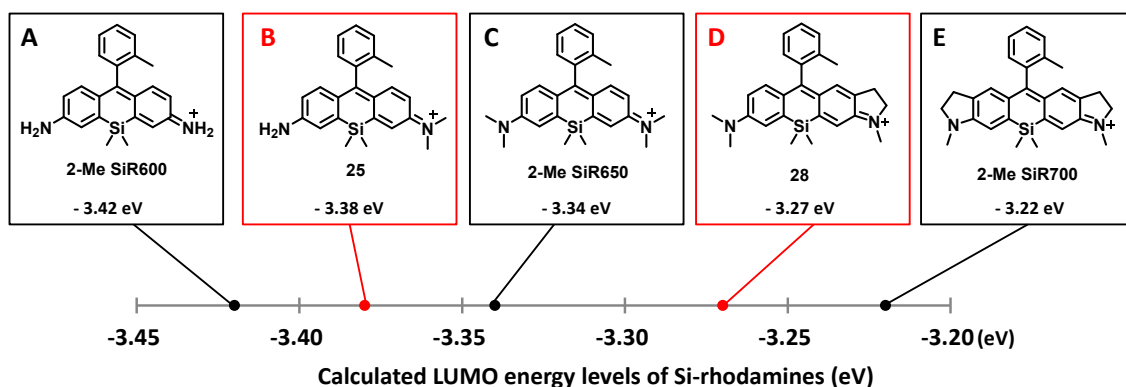

**Fig. S2** Calculated LUMO energy levels of Si-rhodamines. Calculations were performed at the B3LYP/6-31+G(d) (gas phase) level.

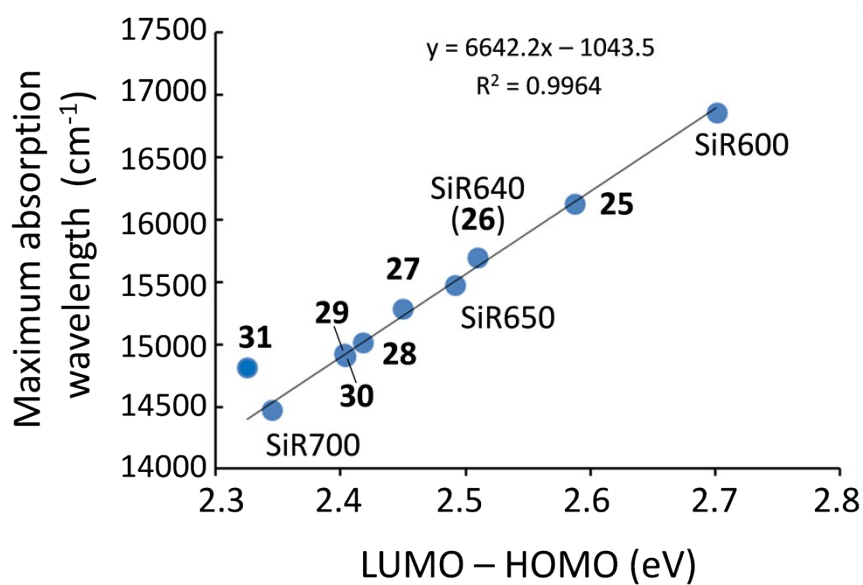

**Fig. S3** Relationship between maximum absorption wavelength ( $\text{cm}^{-1}$ ) and calculated LUMO energy level – HOMO energy difference (eV) of symmetrical and unsymmetrical Si-rhodamines. The HOMO and LUMO energies were calculated at the B3LYP/6-31+G(d) (gas phase) level. The solid line is the best linear fit to the points except for **31**.

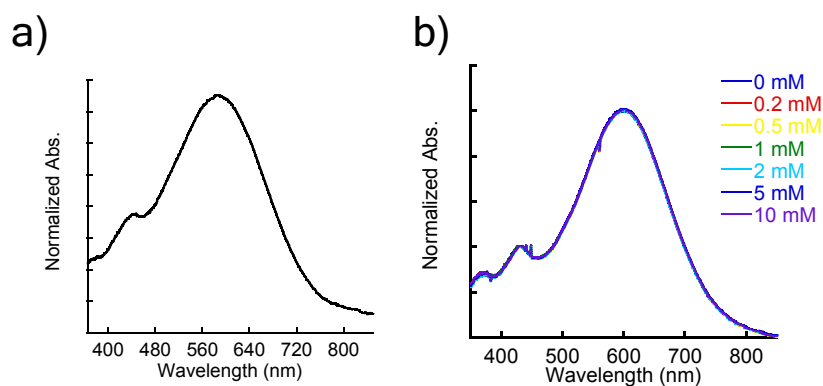

**Fig. S4** (a) Normalized absorption of **azoSiR640** (1  $\mu\text{M}$ ) in PBS at pH 7.4, containing 0.1% DMSO as a cosolvent. (b) Normalized absorption spectra of **azoSiR640** (1  $\mu\text{M}$ ) in sodium phosphate buffer at pH 7.4 containing 1% DMSO and 0.03% Pluronic-F127 in the presence of various concentrations of GSH.

**Table S2.** Photophysical properties of **azoSiR640** and **2,6-diMe SiR640** in PBS (pH 7.4)

| Dye                         | $\lambda_{\text{abs}}$<br>(nm) | $\lambda_{\text{fl}}$<br>(nm) | $\epsilon$<br>( $\text{M}^{-1}\text{cm}^{-1}$ ) | $\Phi_{\text{fl}}^{[\text{a}]}$ |
|-----------------------------|--------------------------------|-------------------------------|-------------------------------------------------|---------------------------------|
| <b>azoSiR640</b>            | 590                            | N.D.                          | $3.8 \times 10^4$                               | <0.001                          |
| <b>2,6-diMe SiR640 (65)</b> | 637                            | 670                           | $5.4 \times 10^4$                               | 0.15                            |

<sup>[a]</sup> For the determination of the fluorescence quantum efficiency ( $\Phi_{\text{fl}}$ ), Cresyl violet in MeOH ( $\Phi_{\text{fl}} = 0.53$ ) was used. N.D. = not detectable.

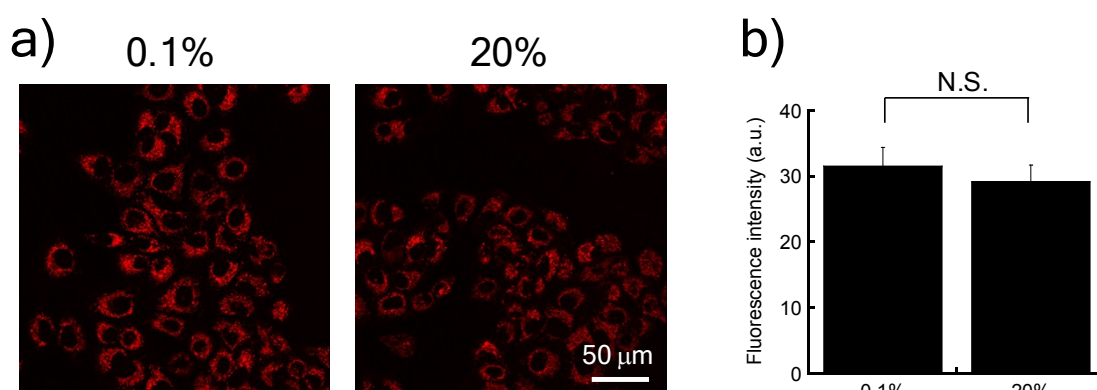

**Fig. S5** Cellular assay with 100 nM **2,6-diMe SiR640** containing 0.1% DMSO as a co-solvent. **2,6-diMe SiR640** was loaded into A549 cells for 20 min, and then the cells were washed with

PBS twice. The medium was changed and the cells were incubated under normoxia or hypoxia (0.1% O<sub>2</sub>) for 6 hrs. Then, fluorescence imaging was performed (a). Cellular fluorescence intensity was acquired at the fluorescent ROI in each cell. N.S. indicates not significant by Student's *t*-test (n = 4).

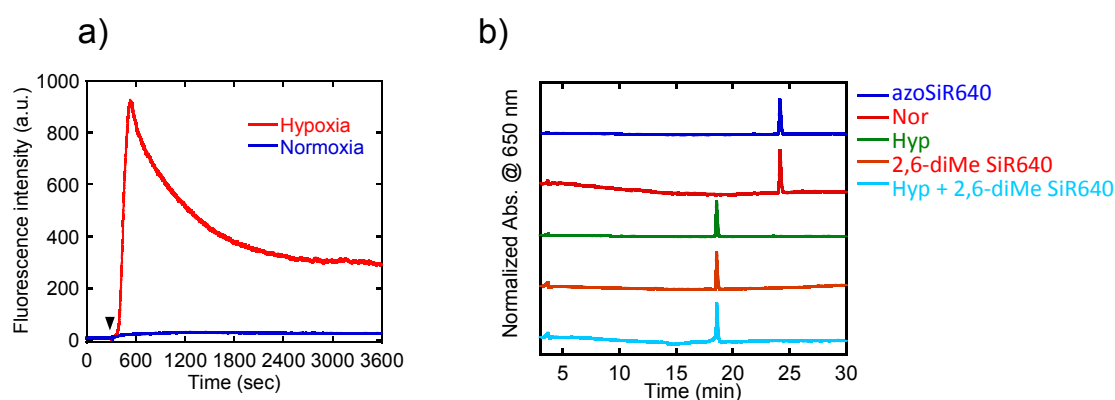

**Fig. S6** (a) Time-dependent changes in the fluorescence intensity of **azoSiR640** (1  $\mu$ M) in the presence of rat liver microsomes (226  $\mu$ g/3 mL) under hypoxia or normoxia. Measurements were performed in potassium phosphate buffer (0.1 M; pH 7.4) containing DMSO (0.1%) as a cosolvent. As a cofactor for reductases, NADPH (50  $\mu$ M) was added at 5 min (the black arrowhead indicates this time point). The excitation and emission wavelengths were 640 and 660 nm. (b) HPLC analyses of the reaction mixtures after *in vitro* assay. 5  $\mu$ M **azoSiR640** was incubated with rat liver microsomes and 50  $\mu$ M NADPH in 100 mM phosphate buffer (pH 7.4; 3 mL) at 37  $^{\circ}$ C for 10 min. Eluent A: H<sub>2</sub>O / 0.1% TFA, eluent B: 80% MeCN / 20% H<sub>2</sub>O / 0.1% TFA. A : B = 70 : 30 to 0 : 100 (20 min), linear gradient. **2,6-diMe SiR640** is the reaction product of **azoSiR640** after reduction under hypoxia.



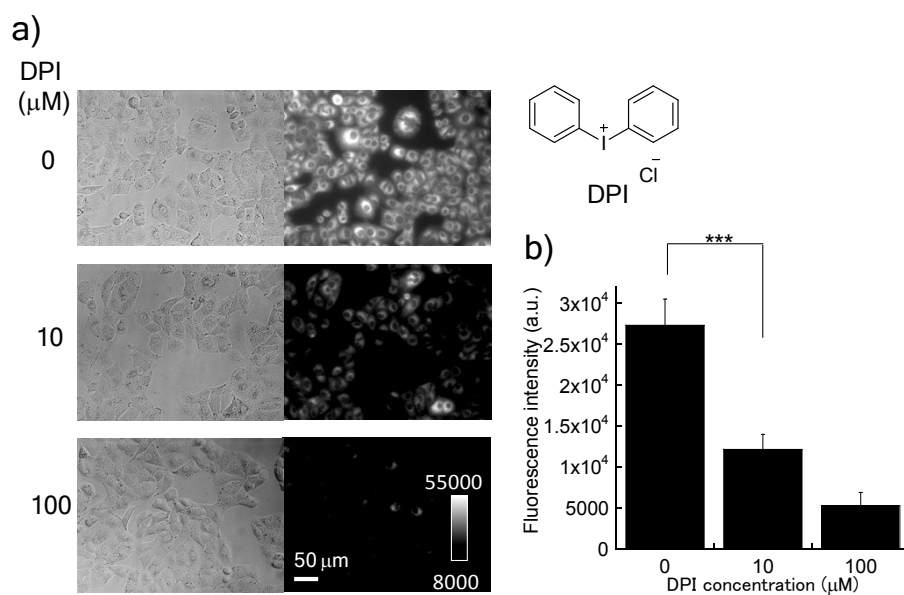

**Fig. S7** (a) Fluorescence microscopy images of A549 cells under hypoxia (0.1% O<sub>2</sub>) with or without DPI. A549 cells were incubated under hypoxia for 6 hr. (b) Fluorescence intensity of cells. Fluorescence intensity of each cell was determined at the fluorescent ROI of each cell. \*\*\* indicates  $p < 0.001$  by Student's t-test ( $n = 5$ ).

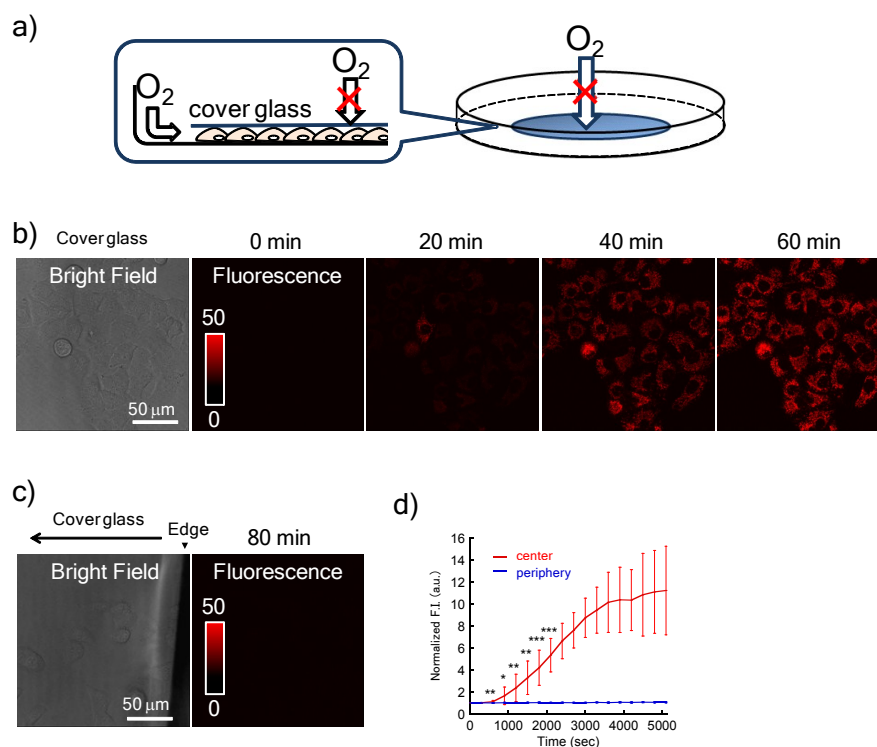

**Fig. S8** (a) Schematic illustration of cellular hypoxia generated by a cover glass. (b) Confocal fluorescence microscopy images of A549 cell with 100 nM azoSiR640 in the central part of the

cover glass (center) at each time point. (c) Fluorescence image of A549 cells near the boundary of the cover glass (periphery) 80 min after mounting the cover glass. (d) Time-dependent change in fluorescence intensity at the center or periphery region of the cover glass.  $n=14$ , \* indicates  $P<0.05$ , \*\* indicates  $P<0.01$  and \*\*\* indicates  $P<0.001$  by Student's  $t$ -test.

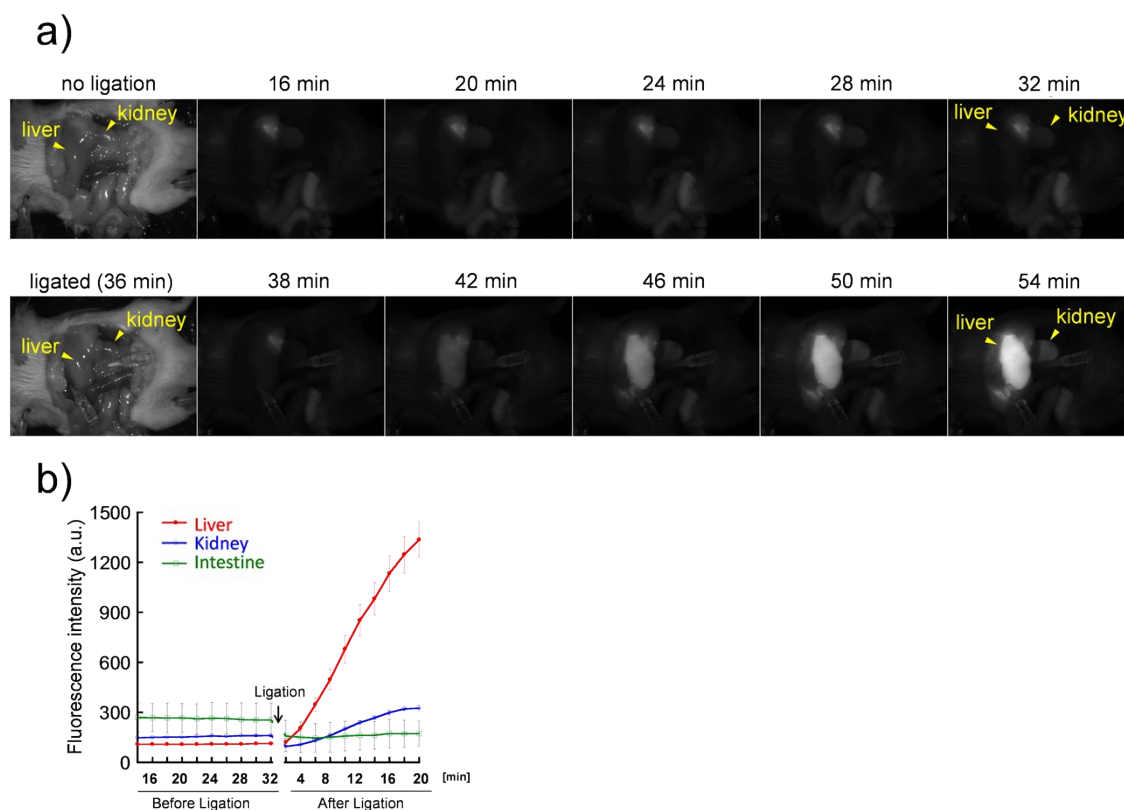

**Fig. S9** Fluorescence images of mouse. ICR mouse was injected with 100  $\mu\text{M}$  azoSiR640 in 100  $\mu\text{L}$  saline solution containing 1% DMSO as a co-solvent from an orbital vein. The portal vein and renal vein were ligated about 35 min after probe injection. Excitation and emission wavelengths were 635 nm and 700 nm, respectively. Exposure time: 300 ms.

## Cartesian Coordinates and Total Electron Energies

### 2-Me SiR600

HOMO -8.81 eV  
LUMO -6.11 eV

E(RB3LYP) = -1251.05125584 a.u.

| Center<br>Number | Atomic<br>Number | Atomic<br>Type | Coordinates (Angstroms) |           |           |
|------------------|------------------|----------------|-------------------------|-----------|-----------|
|                  |                  |                | X                       | Y         | Z         |
| 1                | 6                | 0              | 1.725592                | 2.870467  | -0.046436 |
| 2                | 6                | 0              | -1.010030               | 2.398801  | -0.154223 |
| 3                | 6                | 0              | 0.826242                | 3.971549  | -0.092622 |
| 4                | 6                | 0              | -0.563618               | 3.698313  | -0.145265 |
| 5                | 1                | 0              | 2.791193                | 3.091968  | -0.004989 |
| 6                | 1                | 0              | -2.078411               | 2.226371  | -0.200088 |
| 7                | 6                | 0              | 1.290185                | 1.558369  | -0.053524 |
| 8                | 6                | 0              | -2.177893               | -0.145721 | -0.190250 |
| 9                | 6                | 0              | 0.048052                | -1.284358 | -0.108451 |
| 10               | 6                | 0              | -0.121953               | 1.275460  | -0.110296 |
| 11               | 6                | 0              | 1.485219                | -1.376940 | -0.053240 |
| 12               | 6                | 0              | -0.677323               | -0.046955 | -0.126861 |
| 13               | 6                | 0              | 1.345392                | -3.830443 | -0.088172 |
| 14               | 6                | 0              | -2.956614               | -0.187877 | 0.987410  |
| 15               | 6                | 0              | -2.795510               | -0.193631 | -1.449459 |
| 16               | 6                | 0              | -0.068421               | -3.744326 | -0.137953 |
| 17               | 6                | 0              | -0.683441               | -2.515548 | -0.148125 |
| 18               | 6                | 0              | 2.090938                | -2.619717 | -0.045547 |
| 19               | 6                | 0              | -4.964584               | -0.325483 | -0.401929 |
| 20               | 6                | 0              | -4.184632               | -0.282815 | -1.559398 |
| 21               | 6                | 0              | -4.350149               | -0.278805 | 0.851589  |
| 22               | 1                | 0              | 3.176702                | -2.698436 | -0.006255 |
| 23               | 1                | 0              | -1.765437               | -2.486670 | -0.190976 |
| 24               | 1                | 0              | -2.182305               | -0.160363 | -2.347035 |
| 25               | 1                | 0              | -4.649163               | -0.318487 | -2.540729 |
| 26               | 1                | 0              | -6.046536               | -0.394585 | -0.472204 |
| 27               | 1                | 0              | -4.962184               | -0.312687 | 1.749713  |
| 28               | 1                | 0              | -0.663915               | -4.652919 | -0.170673 |
| 29               | 1                | 0              | -1.274398               | 4.519736  | -0.181391 |
| 30               | 6                | 0              | -2.326323               | -0.136766 | 2.361884  |

|    |    |   |           |           |           |
|----|----|---|-----------|-----------|-----------|
| 31 | 1  | 0 | -3.091446 | -0.184196 | 3.142135  |
| 32 | 1  | 0 | -1.634207 | -0.972515 | 2.524434  |
| 33 | 1  | 0 | -1.754806 | 0.787556  | 2.513547  |
| 34 | 7  | 0 | 1.287807  | 5.243047  | -0.086266 |
| 35 | 1  | 0 | 0.658321  | 6.032999  | -0.122148 |
| 36 | 1  | 0 | 2.276991  | 5.446993  | -0.052574 |
| 37 | 7  | 0 | 1.971381  | -5.029617 | -0.080845 |
| 38 | 1  | 0 | 2.978922  | -5.100817 | -0.049596 |
| 39 | 1  | 0 | 1.452031  | -5.896077 | -0.114510 |
| 40 | 14 | 0 | 2.561319  | 0.168609  | 0.019254  |
| 41 | 6  | 0 | 3.517747  | 0.232224  | 1.644923  |
| 42 | 1  | 0 | 4.220081  | -0.606989 | 1.722326  |
| 43 | 1  | 0 | 4.103678  | 1.156597  | 1.721392  |
| 44 | 1  | 0 | 2.845493  | 0.188309  | 2.509305  |
| 45 | 6  | 0 | 3.720925  | 0.246136  | -1.467125 |
| 46 | 1  | 0 | 4.316210  | 1.167603  | -1.455781 |
| 47 | 1  | 0 | 4.424879  | -0.595387 | -1.463233 |
| 48 | 1  | 0 | 3.166715  | 0.215853  | -2.412025 |

## 2-Me SiR650

HOMO -8.32 eV

LUMO -5.83 eV

E(RB3LYP) = -1408.28356535 a.u.

| Center<br>Number | Atomic<br>Number | Atomic<br>Type | Coordinates (Angstroms) |           |           |
|------------------|------------------|----------------|-------------------------|-----------|-----------|
|                  |                  |                | X                       | Y         | Z         |
| 1                | 6                | 0              | 2.750348                | -1.617910 | -0.036593 |
| 2                | 6                | 0              | 2.465052                | 1.138933  | -0.151060 |
| 3                | 6                | 0              | 3.927046                | -0.806217 | -0.099092 |
| 4                | 6                | 0              | 3.731188                | 0.605071  | -0.151514 |
| 5                | 1                | 0              | 2.869906                | -2.695112 | 0.010235  |

|    |    |   |           |           |           |
|----|----|---|-----------|-----------|-----------|
| 6  | 1  | 0 | 2.370595  | 2.217277  | -0.198402 |
| 7  | 6  | 0 | 1.472268  | -1.089523 | -0.032781 |
| 8  | 6  | 0 | -0.000102 | 2.481993  | -0.176400 |
| 9  | 6  | 0 | -1.281509 | 0.336030  | -0.097018 |
| 10 | 6  | 0 | 1.281587  | 0.336143  | -0.096876 |
| 11 | 6  | 0 | -1.472079 | -1.089632 | -0.032669 |
| 12 | 6  | 0 | 0.000007  | 0.978162  | -0.113356 |
| 13 | 6  | 0 | -3.926873 | -0.806526 | -0.099204 |
| 14 | 6  | 0 | -0.000459 | 3.260146  | 1.002340  |
| 15 | 6  | 0 | 0.000111  | 3.105240  | -1.433572 |
| 16 | 6  | 0 | -3.731112 | 0.604760  | -0.152099 |
| 17 | 6  | 0 | -2.465016 | 1.138715  | -0.151659 |
| 18 | 6  | 0 | -2.750121 | -1.618118 | -0.036422 |
| 19 | 6  | 0 | -0.000380 | 5.276243  | -0.381694 |
| 20 | 6  | 0 | -0.000048 | 4.497556  | -1.540782 |
| 21 | 6  | 0 | -0.000562 | 4.656946  | 0.870355  |
| 22 | 1  | 0 | -2.869601 | -2.695319 | 0.010630  |
| 23 | 1  | 0 | -2.370620 | 2.217052  | -0.199404 |
| 24 | 1  | 0 | 0.000383  | 2.492745  | -2.332262 |
| 25 | 1  | 0 | 0.000110  | 4.965656  | -2.521151 |
| 26 | 1  | 0 | -0.000482 | 6.360633  | -0.449437 |
| 27 | 1  | 0 | -0.000780 | 5.267825  | 1.770021  |
| 28 | 1  | 0 | -4.579296 | 1.276439  | -0.197253 |
| 29 | 1  | 0 | 4.579329  | 1.276828  | -0.196284 |
| 30 | 6  | 0 | -0.000680 | 2.624489  | 2.375226  |
| 31 | 1  | 0 | -0.000192 | 3.389005  | 3.157701  |
| 32 | 1  | 0 | -0.883076 | 1.990932  | 2.529742  |
| 33 | 1  | 0 | 0.881020  | 1.989937  | 2.529590  |
| 34 | 7  | 0 | 5.168853  | -1.352725 | -0.107745 |
| 35 | 7  | 0 | -5.168641 | -1.353127 | -0.107762 |
| 36 | 14 | 0 | 0.000139  | -2.259089 | 0.082440  |
| 37 | 6  | 0 | 0.000303  | -3.155047 | 1.745320  |
| 38 | 1  | 0 | -0.883794 | -3.796530 | 1.848488  |
| 39 | 1  | 0 | 0.884766  | -3.796010 | 1.848588  |
| 40 | 1  | 0 | 0.000053  | -2.446565 | 2.581589  |
| 41 | 6  | 0 | 0.000031  | -3.488209 | -1.351002 |

|    |   |   |           |           |           |
|----|---|---|-----------|-----------|-----------|
| 42 | 1 | 0 | 0.883490  | -4.137876 | -1.315779 |
| 43 | 1 | 0 | -0.882417 | -4.139177 | -1.314465 |
| 44 | 1 | 0 | -0.001057 | -2.975132 | -2.319415 |
| 45 | 6 | 0 | -5.349472 | -2.805486 | -0.056505 |
| 46 | 1 | 0 | -4.874737 | -3.295578 | -0.914970 |
| 47 | 1 | 0 | -4.935139 | -3.226364 | 0.867683  |
| 48 | 1 | 0 | -6.414893 | -3.031944 | -0.084005 |
| 49 | 6 | 0 | -6.356237 | -0.496507 | -0.167214 |
| 50 | 1 | 0 | -6.406070 | 0.172326  | 0.700337  |
| 51 | 1 | 0 | -6.363190 | 0.107825  | -1.082148 |
| 52 | 1 | 0 | -7.247385 | -1.123352 | -0.165978 |
| 53 | 6 | 0 | 5.349788  | -2.805091 | -0.057018 |
| 54 | 1 | 0 | 4.935400  | -3.226344 | 0.866973  |
| 55 | 1 | 0 | 4.875172  | -3.294899 | -0.915712 |
| 56 | 1 | 0 | 6.415229  | -3.031458 | -0.084493 |
| 57 | 6 | 0 | 6.356388  | -0.496002 | -0.166930 |
| 58 | 1 | 0 | 6.363346  | 0.108551  | -1.081720 |
| 59 | 1 | 0 | 6.406123  | 0.172627  | 0.700783  |
| 60 | 1 | 0 | 7.247583  | -1.122780 | -0.165783 |

## 2-Me SiR700

HOMO -8.02 eV

LUMO -5.68 eV

E(RB3LYP) = -1484.51498951 a.u.

| Center<br>Number | Atomic<br>Number | Atomic<br>Type | Coordinates (Angstroms) |           |           |
|------------------|------------------|----------------|-------------------------|-----------|-----------|
|                  |                  |                | X                       | Y         | Z         |
| 1                | 6                | 0              | 2.755047                | -1.804307 | 0.011861  |
| 2                | 6                | 0              | 2.468668                | 0.996638  | -0.100071 |
| 3                | 6                | 0              | 3.888978                | -0.960193 | -0.031953 |
| 4                | 6                | 0              | 3.721130                | 0.450853  | -0.084373 |

|    |    |   |           |           |           |
|----|----|---|-----------|-----------|-----------|
| 5  | 1  | 0 | 2.889455  | -2.882411 | 0.045080  |
| 6  | 1  | 0 | 2.360846  | 2.074130  | -0.146495 |
| 7  | 6  | 0 | 1.477508  | -1.258965 | 0.000043  |
| 8  | 6  | 0 | 0.000981  | 2.306335  | -0.151528 |
| 9  | 6  | 0 | -1.285666 | 0.166315  | -0.103464 |
| 10 | 6  | 0 | 1.288966  | 0.168405  | -0.063573 |
| 11 | 6  | 0 | -1.473581 | -1.261497 | -0.048101 |
| 12 | 6  | 0 | 0.001333  | 0.801001  | -0.096885 |
| 13 | 6  | 0 | -3.883945 | -0.966253 | -0.138950 |
| 14 | 6  | 0 | -0.015946 | 3.077364  | 1.031672  |
| 15 | 6  | 0 | 0.017824  | 2.938817  | -1.403816 |
| 16 | 6  | 0 | -3.716887 | 0.444975  | -0.189396 |
| 17 | 6  | 0 | -2.465250 | 0.992671  | -0.172442 |
| 18 | 6  | 0 | -2.750229 | -1.808646 | -0.065508 |
| 19 | 6  | 0 | 0.001521  | 5.103173  | -0.337965 |
| 20 | 6  | 0 | 0.018226  | 4.331951  | -1.502035 |
| 21 | 6  | 0 | -0.015325 | 4.475176  | 0.909747  |
| 22 | 1  | 0 | -2.884426 | -2.886071 | -0.014091 |
| 23 | 1  | 0 | -2.357993 | 2.070331  | -0.216318 |
| 24 | 1  | 0 | 0.030639  | 2.332088  | -2.306372 |
| 25 | 1  | 0 | 0.031427  | 4.806736  | -2.479190 |
| 26 | 1  | 0 | 0.001584  | 6.188047  | -0.398463 |
| 27 | 1  | 0 | -0.028275 | 5.079939  | 1.813546  |
| 28 | 6  | 0 | -0.034586 | 2.431885  | 2.399764  |
| 29 | 1  | 0 | -0.044961 | 3.190391  | 3.188134  |
| 30 | 1  | 0 | -0.918524 | 1.796401  | 2.536688  |
| 31 | 1  | 0 | 0.844796  | 1.795738  | 2.560570  |
| 32 | 7  | 0 | 5.200355  | -1.289996 | -0.029472 |
| 33 | 7  | 0 | -5.194081 | -1.298343 | -0.175614 |
| 34 | 14 | 0 | 0.001155  | -2.423541 | 0.083302  |
| 35 | 6  | 0 | -0.024275 | -3.330008 | 1.740472  |
| 36 | 1  | 0 | -0.910523 | -3.971077 | 1.826085  |
| 37 | 1  | 0 | 0.858172  | -3.972133 | 1.852885  |
| 38 | 1  | 0 | -0.036490 | -2.626366 | 2.580708  |
| 39 | 6  | 0 | 0.025230  | -3.643056 | -1.358333 |
| 40 | 1  | 0 | 0.907465  | -4.293608 | -1.311420 |

|    |   |   |           |           |           |
|----|---|---|-----------|-----------|-----------|
| 41 | 1 | 0 | -0.858726 | -4.292768 | -1.342345 |
| 42 | 1 | 0 | 0.042204  | -3.122971 | -2.322842 |
| 43 | 6 | 0 | -5.085561 | 1.087697  | -0.300519 |
| 44 | 1 | 0 | -5.233379 | 1.514939  | -1.299988 |
| 45 | 1 | 0 | -5.239885 | 1.893031  | 0.423805  |
| 46 | 6 | 0 | -6.050998 | -0.101099 | -0.058585 |
| 47 | 1 | 0 | -6.864400 | -0.153320 | -0.789088 |
| 48 | 1 | 0 | -6.498314 | -0.071111 | 0.945439  |
| 49 | 6 | 0 | -5.747782 | -2.626887 | 0.004507  |
| 50 | 1 | 0 | -5.078379 | -3.377718 | -0.421854 |
| 51 | 1 | 0 | -5.912052 | -2.856226 | 1.067608  |
| 52 | 1 | 0 | -6.707084 | -2.690207 | -0.517354 |
| 53 | 6 | 0 | 5.091940  | 1.098434  | -0.083866 |
| 54 | 1 | 0 | 5.210833  | 1.847454  | -0.872385 |
| 55 | 1 | 0 | 5.284796  | 1.598367  | 0.873377  |
| 56 | 6 | 0 | 6.047527  | -0.106432 | -0.280347 |
| 57 | 1 | 0 | 6.895971  | -0.102703 | 0.411080  |
| 58 | 1 | 0 | 6.444939  | -0.154795 | -1.304488 |
| 59 | 6 | 0 | 5.747882  | -2.629152 | -0.134876 |
| 60 | 1 | 0 | 5.100503  | -3.344821 | 0.377304  |
| 61 | 1 | 0 | 5.862822  | -2.937909 | -1.184280 |
| 62 | 1 | 0 | 6.730489  | -2.654585 | 0.345160  |

Compound **25**

HOMO -8.55 eV

LUMO -5.96 eV

E(RB3LYP) = -1329.66757899 a.u.

| Center<br>Number | Atomic<br>Number | Atomic<br>Type | Coordinates (Angstroms) |           |           |
|------------------|------------------|----------------|-------------------------|-----------|-----------|
|                  |                  |                | X                       | Y         | Z         |
| 1                | 6                | 0              | 2.713242                | -0.935327 | -0.028700 |



|    |    |   |           |           |           |
|----|----|---|-----------|-----------|-----------|
| 2  | 6  | 0 | 1.560612  | 1.586810  | -0.128820 |
| 3  | 6  | 0 | 3.567969  | 0.212842  | -0.062682 |
| 4  | 6  | 0 | 2.929985  | 1.488065  | -0.111322 |
| 5  | 1  | 0 | 3.172201  | -1.917375 | 0.011020  |
| 6  | 1  | 0 | 1.125039  | 2.577936  | -0.170729 |
| 7  | 6  | 0 | 1.334234  | -0.845838 | -0.043685 |
| 8  | 6  | 0 | -1.201807 | 2.068130  | -0.188013 |
| 9  | 6  | 0 | -1.732935 | -0.376860 | -0.111220 |
| 10 | 6  | 0 | 0.696024  | 0.445154  | -0.097945 |
| 11 | 6  | 0 | -1.454034 | -1.788658 | -0.055152 |
| 12 | 6  | 0 | -0.720726 | 0.643262  | -0.122545 |
| 13 | 6  | 0 | -3.860457 | -2.285946 | -0.102511 |
| 14 | 6  | 0 | -1.466617 | 2.804096  | 0.987992  |
| 15 | 6  | 0 | -1.384566 | 2.658686  | -1.447703 |
| 16 | 6  | 0 | -4.139305 | -0.898086 | -0.155243 |
| 17 | 6  | 0 | -3.109292 | 0.012887  | -0.160516 |
| 18 | 6  | 0 | -2.499800 | -2.694355 | -0.052994 |
| 19 | 6  | 0 | -2.092873 | 4.714920  | -0.404245 |
| 20 | 6  | 0 | -1.828827 | 3.977717  | -1.560344 |
| 21 | 6  | 0 | -1.911333 | 4.127728  | 0.850060  |
| 22 | 1  | 0 | -2.295984 | -3.763674 | -0.012690 |
| 23 | 1  | 0 | -3.360037 | 1.065674  | -0.208409 |
| 24 | 1  | 0 | -1.176519 | 2.079032  | -2.344068 |
| 25 | 1  | 0 | -1.965638 | 4.421435  | -2.542458 |
| 26 | 1  | 0 | -2.438696 | 5.742380  | -0.475936 |
| 27 | 1  | 0 | -2.118880 | 4.706361  | 1.747090  |
| 28 | 1  | 0 | -5.170074 | -0.555539 | -0.194803 |
| 29 | 1  | 0 | 3.518417  | 2.396709  | -0.137726 |
| 30 | 6  | 0 | -1.283953 | 2.200375  | 2.363120  |
| 31 | 1  | 0 | -1.524347 | 2.929208  | 3.142604  |
| 32 | 1  | 0 | -1.932221 | 1.327870  | 2.513075  |
| 33 | 1  | 0 | -0.252166 | 1.865358  | 2.527239  |
| 34 | 7  | 0 | 4.917974  | 0.094566  | -0.048749 |
| 35 | 7  | 0 | -4.859663 | -3.200063 | -0.099403 |
| 36 | 14 | 0 | 0.316044  | -2.429889 | 0.020458  |
| 37 | 6  | 0 | 0.621620  | -3.347853 | 1.641648  |

|    |   |   |           |           |           |
|----|---|---|-----------|-----------|-----------|
| 38 | 1 | 0 | -0.002361 | -4.247534 | 1.711962  |
| 39 | 1 | 0 | 1.667700  | -3.669434 | 1.720430  |
| 40 | 1 | 0 | 0.398787  | -2.716257 | 2.509133  |
| 41 | 6 | 0 | 0.690125  | -3.528614 | -1.468310 |
| 42 | 1 | 0 | 1.736100  | -3.859851 | -1.462230 |
| 43 | 1 | 0 | 0.063923  | -4.429405 | -1.462260 |
| 44 | 1 | 0 | 0.510400  | -3.000885 | -2.411849 |
| 45 | 6 | 0 | 5.556644  | -1.223294 | 0.000023  |
| 46 | 1 | 0 | 5.274434  | -1.768015 | 0.908836  |
| 47 | 1 | 0 | 5.289152  | -1.827010 | -0.875382 |
| 48 | 1 | 0 | 6.638326  | -1.093563 | 0.004819  |
| 49 | 6 | 0 | 5.768434  | 1.288423  | -0.084319 |
| 50 | 1 | 0 | 5.597133  | 1.868477  | -0.998676 |
| 51 | 1 | 0 | 5.584225  | 1.930816  | 0.784714  |
| 52 | 1 | 0 | 6.813438  | 0.981294  | -0.065948 |
| 53 | 1 | 0 | -5.830052 | -2.920860 | -0.138763 |
| 54 | 1 | 0 | -4.669282 | -4.191809 | -0.067787 |

Compound **26 (2-Me SiR640)**

HOMO -8.37 eV

LUMO -5.87 eV

E(RB3LYP) = -1367.78379453 a.u.

| Center<br>Number | Atomic<br>Number | Atomic<br>Type | Coordinates (Angstroms) |           |           |
|------------------|------------------|----------------|-------------------------|-----------|-----------|
|                  |                  |                | X                       | Y         | Z         |
| 1                | 6                | 0              | 3.079817                | -2.300720 | -0.029719 |
| 2                | 6                | 0              | 3.176517                | 0.471590  | -0.122407 |
| 3                | 6                | 0              | 4.341617                | -1.648261 | -0.052125 |
| 4                | 6                | 0              | 4.358057                | -0.233578 | -0.098867 |
| 5                | 1                | 0              | 3.075274                | -3.389605 | 0.004479  |
| 6                | 1                | 0              | 3.230417                | 1.552732  | -0.162012 |

|    |    |   |           |           |           |
|----|----|---|-----------|-----------|-----------|
| 7  | 6  | 0 | 1.884611  | -1.602658 | -0.051234 |
| 8  | 6  | 0 | 0.930762  | 2.141351  | -0.187239 |
| 9  | 6  | 0 | -0.646823 | 0.207611  | -0.106372 |
| 10 | 6  | 0 | 1.896316  | -0.165236 | -0.098942 |
| 11 | 6  | 0 | -1.032281 | -1.183996 | -0.060958 |
| 12 | 6  | 0 | 0.710198  | 0.652989  | -0.121361 |
| 13 | 6  | 0 | -3.377876 | -0.546681 | -0.069545 |
| 14 | 6  | 0 | 1.048624  | 2.917495  | 0.986837  |
| 15 | 6  | 0 | 1.019304  | 2.750900  | -1.447977 |
| 16 | 6  | 0 | -3.015988 | 0.829848  | -0.116386 |
| 17 | 6  | 0 | -1.701146 | 1.194155  | -0.134873 |
| 18 | 6  | 0 | -2.371563 | -1.543109 | -0.041996 |
| 19 | 6  | 0 | 1.342086  | 4.904056  | -0.409062 |
| 20 | 6  | 0 | 1.224212  | 4.127312  | -1.563547 |
| 21 | 6  | 0 | 1.254227  | 4.298450  | 0.846639  |
| 22 | 1  | 0 | -2.657245 | -2.590833 | 0.001863  |
| 23 | 1  | 0 | -1.441630 | 2.245735  | -0.174804 |
| 24 | 1  | 0 | 0.928423  | 2.139941  | -2.343121 |
| 25 | 1  | 0 | 1.291857  | 4.584653  | -2.546675 |
| 26 | 1  | 0 | 1.502605  | 5.976061  | -0.483345 |
| 27 | 1  | 0 | 1.347632  | 4.907367  | 1.742744  |
| 28 | 1  | 0 | 5.307520  | 0.295242  | -0.118590 |
| 29 | 6  | 0 | 0.959727  | 2.295757  | 2.363220  |
| 30 | 1  | 0 | 1.065420  | 3.057292  | 3.141440  |
| 31 | 1  | 0 | -0.001422 | 1.790176  | 2.519903  |
| 32 | 1  | 0 | 1.745194  | 1.546316  | 2.522415  |
| 33 | 7  | 0 | 5.493929  | -2.362223 | -0.029806 |
| 34 | 1  | 0 | 6.395998  | -1.907707 | -0.050938 |
| 35 | 1  | 0 | 5.489881  | -3.371994 | -0.002829 |
| 36 | 7  | 0 | -4.718200 | -0.691867 | -0.061654 |
| 37 | 14 | 0 | 0.262305  | -2.554294 | -0.026763 |
| 38 | 6  | 0 | 0.106021  | -3.576501 | 1.552909  |
| 39 | 1  | 0 | -0.862408 | -4.090124 | 1.597943  |
| 40 | 1  | 0 | 0.885926  | -4.346646 | 1.600715  |
| 41 | 1  | 0 | 0.197172  | -2.951045 | 2.448170  |
| 42 | 6  | 0 | 0.103817  | -3.643196 | -1.560872 |

|    |   |   |           |           |           |
|----|---|---|-----------|-----------|-----------|
| 43 | 1 | 0 | 0.883909  | -4.414420 | -1.578030 |
| 44 | 1 | 0 | -0.864965 | -4.157628 | -1.582335 |
| 45 | 1 | 0 | 0.192879  | -3.055426 | -2.481516 |
| 46 | 6 | 0 | -4.283234 | 1.660020  | -0.173479 |
| 47 | 1 | 0 | -4.391614 | 2.139060  | -1.153928 |
| 48 | 1 | 0 | -4.305270 | 2.453017  | 0.579996  |
| 49 | 6 | 0 | -5.402545 | 0.612093  | 0.059622  |
| 50 | 1 | 0 | -6.211866 | 0.674025  | -0.674897 |
| 51 | 1 | 0 | -5.847386 | 0.694912  | 1.061003  |
| 52 | 6 | 0 | -5.454417 | -1.932495 | 0.096979  |
| 53 | 1 | 0 | -4.885028 | -2.767614 | -0.316724 |
| 54 | 1 | 0 | -5.672531 | -2.136385 | 1.154909  |
| 55 | 1 | 0 | -6.401360 | -1.861522 | -0.446416 |

Compound 27

HOMO -8.21 eV

LUMO -5.76 eV

E(RB3LYP) = -1446.41115483 a.u.

| Center<br>Number | Atomic<br>Number | Atomic<br>Type | Coordinates (Angstroms) |           |           |
|------------------|------------------|----------------|-------------------------|-----------|-----------|
|                  |                  |                | X                       | Y         | Z         |
| 1                | 6                | 0              | -3.127430               | -1.026159 | -0.035986 |
| 2                | 6                | 0              | -2.298886               | 1.626897  | -0.138054 |
| 3                | 6                | 0              | -4.105849               | 0.007700  | -0.075131 |
| 4                | 6                | 0              | -3.643153               | 1.350868  | -0.126459 |
| 5                | 1                | 0              | -3.469875               | -2.056539 | 0.001148  |
| 6                | 1                | 0              | -1.991806               | 2.664817  | -0.181918 |
| 7                | 6                | 0              | -1.767810               | -0.757993 | -0.045343 |
| 8                | 6                | 0              | 0.378110                | 2.451269  | -0.189969 |
| 9                | 6                | 0              | 1.222343                | 0.103469  | -0.067202 |
| 10               | 6                | 0              | -1.299536               | 0.600292  | -0.097269 |

|    |    |   |           |           |           |
|----|----|---|-----------|-----------|-----------|
| 11 | 6  | 0 | 1.123136  | -1.335037 | -0.009727 |
| 12 | 6  | 0 | 0.088220  | 0.975683  | -0.108514 |
| 13 | 6  | 0 | 3.546646  | -1.515412 | 0.010101  |
| 14 | 6  | 0 | 0.504584  | 3.040100  | -1.457176 |
| 15 | 6  | 0 | 0.521949  | 3.236461  | 0.975153  |
| 16 | 6  | 0 | 3.662860  | -0.098120 | -0.042258 |
| 17 | 6  | 0 | 2.543811  | 0.683165  | -0.081428 |
| 18 | 6  | 0 | 2.267063  | -2.120127 | 0.025165  |
| 19 | 6  | 0 | 0.919277  | 5.189106  | -0.442735 |
| 20 | 6  | 0 | 0.792650  | 4.604485  | 0.819593  |
| 21 | 6  | 0 | 0.774387  | 4.403908  | -1.588367 |
| 22 | 1  | 0 | 2.186556  | -3.203628 | 0.053417  |
| 23 | 1  | 0 | 2.650117  | 1.761004  | -0.125540 |
| 24 | 1  | 0 | 0.905209  | 5.220302  | 1.708797  |
| 25 | 1  | 0 | 1.128957  | 6.251715  | -0.528925 |
| 26 | 1  | 0 | 0.868842  | 4.845394  | -2.576549 |
| 27 | 1  | 0 | -4.364091 | 2.164429  | -0.158882 |
| 28 | 7  | 0 | -5.432846 | -0.254219 | -0.065490 |
| 29 | 1  | 0 | -6.060756 | 0.539847  | -0.097426 |
| 30 | 7  | 0 | 4.764182  | -2.097889 | 0.040781  |
| 31 | 14 | 0 | -0.553943 | -2.194333 | -0.002179 |
| 32 | 6  | 0 | -0.745975 | -3.276091 | -1.538405 |
| 33 | 1  | 0 | -0.005484 | -4.085598 | -1.545782 |
| 34 | 1  | 0 | -1.739417 | -3.740536 | -1.570996 |
| 35 | 1  | 0 | -0.617308 | -2.694077 | -2.458052 |
| 36 | 6  | 0 | -0.769794 | -3.212958 | 1.573374  |
| 37 | 1  | 0 | -1.763594 | -3.676411 | 1.609551  |
| 38 | 1  | 0 | -0.030437 | -4.021939 | 1.624453  |
| 39 | 1  | 0 | -0.654609 | -2.595259 | 2.471253  |
| 40 | 6  | 0 | 5.134297  | 0.265713  | -0.012284 |
| 41 | 1  | 0 | 5.399931  | 0.734159  | 0.943168  |
| 42 | 1  | 0 | 5.416370  | 0.963286  | -0.806502 |
| 43 | 6  | 0 | 5.838999  | -1.106537 | -0.170698 |
| 44 | 1  | 0 | 6.640165  | -1.267410 | 0.557587  |
| 45 | 1  | 0 | 6.263063  | -1.240563 | -1.175899 |
| 46 | 6  | 0 | 5.040030  | -3.520344 | -0.035712 |

|    |   |   |           |           |           |
|----|---|---|-----------|-----------|-----------|
| 47 | 1 | 0 | 4.247525  | -4.087300 | 0.458177  |
| 48 | 1 | 0 | 5.126655  | -3.858907 | -1.078283 |
| 49 | 1 | 0 | 5.982082  | -3.731927 | 0.478445  |
| 50 | 1 | 0 | 0.389916  | 2.422843  | -2.345229 |
| 51 | 6 | 0 | 0.391825  | 2.637316  | 2.358226  |
| 52 | 1 | 0 | -0.594236 | 2.181765  | 2.512908  |
| 53 | 1 | 0 | 1.137898  | 1.851754  | 2.532445  |
| 54 | 1 | 0 | 0.528757  | 3.402504  | 3.127998  |
| 55 | 6 | 0 | -6.052828 | -1.579171 | -0.015510 |
| 56 | 1 | 0 | -5.722084 | -2.167585 | -0.881951 |
| 57 | 1 | 0 | -5.716244 | -2.102754 | 0.889331  |
| 58 | 6 | 0 | -7.574686 | -1.457925 | -0.014986 |
| 59 | 1 | 0 | -7.935113 | -0.960860 | -0.923275 |
| 60 | 1 | 0 | -8.027158 | -2.453472 | 0.021989  |
| 61 | 1 | 0 | -7.929411 | -0.896980 | 0.857625  |

Compound **28**

HOMO -8.16 eV

LUMO -5.74 eV

E(RB3LYP) = -1446.39942243 a.u.

| Center<br>Number | Atomic<br>Number | Atomic<br>Type | Coordinates (Angstroms) |           |           |
|------------------|------------------|----------------|-------------------------|-----------|-----------|
|                  |                  |                | X                       | Y         | Z         |
| 1                | 6                | 0              | -3.020626               | -1.471975 | -0.035183 |
| 2                | 6                | 0              | -2.510143               | 1.251141  | -0.142309 |
| 3                | 6                | 0              | -4.127129               | -0.567714 | -0.086399 |
| 4                | 6                | 0              | -3.816553               | 0.822052  | -0.137906 |
| 5                | 1                | 0              | -3.226456               | -2.536298 | 0.006215  |
| 6                | 1                | 0              | -2.329617               | 2.318363  | -0.188878 |
| 7                | 6                | 0              | -1.703364               | -1.048066 | -0.035798 |
| 8                | 6                | 0              | 0.047832                | 2.393839  | -0.177869 |

|    |    |   |           |           |           |
|----|----|---|-----------|-----------|-----------|
| 9  | 6  | 0 | 1.165134  | 0.161229  | -0.067713 |
| 10 | 6  | 0 | -1.396364 | 0.355877  | -0.092518 |
| 11 | 6  | 0 | 1.236158  | -1.278978 | -0.005327 |
| 12 | 6  | 0 | -0.063889 | 0.893766  | -0.103137 |
| 13 | 6  | 0 | 3.664329  | -1.171821 | -0.011931 |
| 14 | 6  | 0 | 0.107993  | 3.002076  | -1.440853 |
| 15 | 6  | 0 | 0.090180  | 3.183255  | 0.992507  |
| 16 | 6  | 0 | 3.612274  | 0.249141  | -0.067225 |
| 17 | 6  | 0 | 2.408559  | 0.892844  | -0.095493 |
| 18 | 6  | 0 | 2.465358  | -1.923344 | 0.018392  |
| 19 | 6  | 0 | 0.254784  | 5.178871  | -0.411421 |
| 20 | 6  | 0 | 0.195032  | 4.574837  | 0.846712  |
| 21 | 6  | 0 | 0.210856  | 4.389439  | -1.562417 |
| 22 | 1  | 0 | 2.514390  | -3.008748 | 0.050724  |
| 23 | 1  | 0 | 2.386042  | 1.975523  | -0.142412 |
| 24 | 1  | 0 | 0.228583  | 5.193886  | 1.740180  |
| 25 | 1  | 0 | 0.333883  | 6.259656  | -0.490170 |
| 26 | 1  | 0 | 0.255195  | 4.845604  | -2.547454 |
| 27 | 1  | 0 | -4.606954 | 1.561292  | -0.178209 |
| 28 | 7  | 0 | -5.410883 | -1.011241 | -0.086362 |
| 29 | 7  | 0 | 4.942525  | -1.606569 | 0.006382  |
| 30 | 14 | 0 | -0.328447 | -2.329439 | 0.041531  |
| 31 | 6  | 0 | -0.398191 | -3.482094 | -1.452736 |
| 32 | 1  | 0 | 0.437781  | -4.192696 | -1.445548 |
| 33 | 1  | 0 | -1.324997 | -4.069332 | -1.454260 |
| 34 | 1  | 0 | -0.354881 | -2.921653 | -2.393557 |
| 35 | 6  | 0 | -0.414659 | -3.305986 | 1.655874  |
| 36 | 1  | 0 | -1.346507 | -3.881877 | 1.717911  |
| 37 | 1  | 0 | 0.415893  | -4.018648 | 1.733105  |
| 38 | 1  | 0 | -0.371297 | -2.643469 | 2.527865  |
| 39 | 6  | 0 | 5.030784  | 0.783907  | -0.053796 |
| 40 | 1  | 0 | 5.249638  | 1.282584  | 0.898267  |
| 41 | 1  | 0 | 5.220160  | 1.508197  | -0.851631 |
| 42 | 6  | 0 | 5.890458  | -0.495973 | -0.218911 |
| 43 | 1  | 0 | 6.713411  | -0.559652 | 0.499977  |
| 44 | 1  | 0 | 6.315547  | -0.581398 | -1.229006 |

|    |   |   |           |           |           |
|----|---|---|-----------|-----------|-----------|
| 45 | 6 | 0 | 5.383326  | -2.986709 | -0.071790 |
| 46 | 1 | 0 | 4.672282  | -3.641393 | 0.437532  |
| 47 | 1 | 0 | 5.491526  | -3.317486 | -1.114864 |
| 48 | 1 | 0 | 6.352453  | -3.082798 | 0.426262  |
| 49 | 1 | 0 | 0.073012  | 2.381293  | -2.333171 |
| 50 | 6 | 0 | 0.023430  | 2.564368  | 2.371387  |
| 51 | 1 | 0 | -0.908842 | 2.005311  | 2.520493  |
| 52 | 1 | 0 | 0.848685  | 1.861847  | 2.542631  |
| 53 | 1 | 0 | 0.076138  | 3.334634  | 3.146479  |
| 54 | 6 | 0 | -5.709478 | -2.443629 | -0.040308 |
| 55 | 1 | 0 | -5.288850 | -2.966127 | -0.908106 |
| 56 | 1 | 0 | -6.790239 | -2.581616 | -0.053345 |
| 57 | 6 | 0 | -6.522802 | -0.059004 | -0.135536 |
| 58 | 1 | 0 | -6.507340 | 0.613378  | 0.730610  |
| 59 | 1 | 0 | -6.490078 | 0.542650  | -1.051907 |
| 60 | 1 | 0 | -7.463233 | -0.609016 | -0.122631 |
| 61 | 1 | 0 | -5.318295 | -2.903289 | 0.875541  |

Compound **29**

HOMO -8.08 eV

LUMO -5.68 eV

E(RB3LYP) = -1525.02742914 a.u.

| Center<br>Number | Atomic<br>Number | Atomic<br>Type | Coordinates (Angstroms) |           |           |
|------------------|------------------|----------------|-------------------------|-----------|-----------|
|                  |                  |                | X                       | Y         | Z         |
| 1                | 6                | 0              | -2.658779               | -1.115603 | -0.142794 |
| 2                | 6                | 0              | -1.910381               | 1.549515  | -0.152762 |
| 3                | 6                | 0              | -3.690178               | -0.121484 | -0.199094 |
| 4                | 6                | 0              | -3.249056               | 1.236416  | -0.182487 |
| 5                | 1                | 0              | -2.947087               | -2.160273 | -0.119109 |
| 6                | 1                | 0              | -1.640061               | 2.598765  | -0.147787 |



|    |    |   |           |           |           |
|----|----|---|-----------|-----------|-----------|
| 7  | 6  | 0 | -1.310707 | -0.809906 | -0.116287 |
| 8  | 6  | 0 | 0.741406  | 2.464651  | -0.140480 |
| 9  | 6  | 0 | 1.654203  | 0.137835  | -0.075767 |
| 10 | 6  | 0 | -0.877923 | 0.562046  | -0.127206 |
| 11 | 6  | 0 | 1.595529  | -1.303295 | -0.054993 |
| 12 | 6  | 0 | 0.494941  | 0.979172  | -0.106352 |
| 13 | 6  | 0 | 4.023124  | -1.415377 | -0.022251 |
| 14 | 6  | 0 | 0.851124  | 3.098575  | -1.387288 |
| 15 | 6  | 0 | 0.859344  | 3.215855  | 1.049702  |
| 16 | 6  | 0 | 4.098925  | 0.004958  | -0.037704 |
| 17 | 6  | 0 | 2.957796  | 0.754963  | -0.065415 |
| 18 | 6  | 0 | 2.761955  | -2.056310 | -0.031682 |
| 19 | 6  | 0 | 1.198691  | 5.225129  | -0.302545 |
| 20 | 6  | 0 | 1.088159  | 4.595893  | 0.939702  |
| 21 | 6  | 0 | 1.079604  | 4.473496  | -1.473398 |
| 22 | 1  | 0 | 2.712526  | -3.142101 | -0.030502 |
| 23 | 1  | 0 | 3.033032  | 1.836220  | -0.082245 |
| 24 | 1  | 0 | 1.179694  | 5.185498  | 1.848892  |
| 25 | 1  | 0 | 1.375673  | 6.295946  | -0.353562 |
| 26 | 1  | 0 | 1.161997  | 4.949617  | -2.446492 |
| 27 | 1  | 0 | -3.961744 | 2.050097  | -0.190385 |
| 28 | 7  | 0 | -5.011005 | -0.444604 | -0.268891 |
| 29 | 7  | 0 | 5.257799  | -1.963852 | 0.002677  |
| 30 | 14 | 0 | -0.056381 | -2.210486 | -0.073293 |
| 31 | 6  | 0 | -0.201701 | -3.287200 | -1.618390 |
| 32 | 1  | 0 | 0.559335  | -4.077442 | -1.624386 |
| 33 | 1  | 0 | -1.182233 | -3.777371 | -1.664973 |
| 34 | 1  | 0 | -0.079370 | -2.695355 | -2.532657 |
| 35 | 6  | 0 | -0.255593 | -3.250548 | 1.491103  |
| 36 | 1  | 0 | -1.233843 | -3.746946 | 1.512404  |
| 37 | 1  | 0 | 0.509442  | -4.035220 | 1.543391  |
| 38 | 1  | 0 | -0.170342 | -2.637440 | 2.395501  |
| 39 | 6  | 0 | 5.559171  | 0.409308  | 0.013293  |
| 40 | 1  | 0 | 5.805800  | 0.852237  | 0.985967  |
| 41 | 1  | 0 | 5.826383  | 1.140798  | -0.755106 |
| 42 | 6  | 0 | 6.302767  | -0.936795 | -0.185440 |

|    |   |   |           |           |           |
|----|---|---|-----------|-----------|-----------|
| 43 | 1 | 0 | 7.111933  | -1.093879 | 0.534712  |
| 44 | 1 | 0 | 6.725506  | -1.029857 | -1.196049 |
| 45 | 6 | 0 | 5.572195  | -3.374881 | -0.118899 |
| 46 | 1 | 0 | 4.801122  | -3.977988 | 0.366325  |
| 47 | 1 | 0 | 5.656740  | -3.681127 | -1.171774 |
| 48 | 1 | 0 | 6.525130  | -3.574955 | 0.379480  |
| 49 | 1 | 0 | 0.756166  | 2.507493  | -2.295250 |
| 50 | 6 | 0 | 0.743174  | 2.568756  | 2.412257  |
| 51 | 1 | 0 | -0.230218 | 2.081121  | 2.548488  |
| 52 | 1 | 0 | 1.510355  | 1.798965  | 2.563532  |
| 53 | 1 | 0 | 0.856676  | 3.312178  | 3.206813  |
| 54 | 6 | 0 | -5.457867 | -1.843613 | -0.167621 |
| 55 | 1 | 0 | -4.783866 | -2.469315 | -0.758500 |
| 56 | 1 | 0 | -6.428143 | -1.918831 | -0.657297 |
| 57 | 6 | 0 | -6.015431 | 0.647725  | -0.265556 |
| 58 | 1 | 0 | -5.951322 | 1.181421  | 0.693215  |
| 59 | 1 | 0 | -5.732483 | 1.357934  | -1.049765 |
| 60 | 6 | 0 | -7.463464 | 0.228356  | -0.509683 |
| 61 | 1 | 0 | -8.076536 | 1.135963  | -0.501999 |
| 62 | 1 | 0 | -7.600358 | -0.248938 | -1.485732 |
| 63 | 1 | 0 | -7.855034 | -0.433838 | 0.268772  |
| 64 | 6 | 0 | -5.558575 | -2.355367 | 1.275314  |
| 65 | 1 | 0 | -4.593661 | -2.304100 | 1.791007  |
| 66 | 1 | 0 | -6.280261 | -1.767922 | 1.853396  |
| 67 | 1 | 0 | -5.893885 | -3.398976 | 1.277626  |

---

Compound **30**

HOMO      -8.07 eV

LUMO      -5.66 eV

E(RB3LYP) = -1523.82909578 a.u.

---

| Center | Atomic | Atomic | Coordinates (Angstroms) |
|--------|--------|--------|-------------------------|
|--------|--------|--------|-------------------------|

| Number | Number | Type | X         | Y         | Z         |
|--------|--------|------|-----------|-----------|-----------|
| 1      | 6      | 0    | -2.676466 | -1.110638 | -0.018251 |
| 2      | 6      | 0    | -1.910795 | 1.554607  | -0.124928 |
| 3      | 6      | 0    | -3.690613 | -0.101973 | -0.054670 |
| 4      | 6      | 0    | -3.251224 | 1.253202  | -0.106003 |
| 5      | 1      | 0    | -2.990632 | -2.148862 | 0.032782  |
| 6      | 1      | 0    | -1.628179 | 2.599292  | -0.176685 |
| 7      | 6      | 0    | -1.326078 | -0.815134 | -0.030641 |
| 8      | 6      | 0    | 0.748413  | 2.441240  | -0.197463 |
| 9      | 6      | 0    | 1.644009  | 0.111187  | -0.067171 |
| 10     | 6      | 0    | -0.886486 | 0.554884  | -0.087742 |
| 11     | 6      | 0    | 1.576572  | -1.327809 | 0.000916  |
| 12     | 6      | 0    | 0.489522  | 0.960191  | -0.107454 |
| 13     | 6      | 0    | 4.003480  | -1.456123 | 0.013445  |
| 14     | 6      | 0    | 0.852627  | 3.027290  | -1.467981 |
| 15     | 6      | 0    | 0.886337  | 3.234589  | 0.962832  |
| 16     | 6      | 0    | 4.088199  | -0.037925 | -0.051650 |
| 17     | 6      | 0    | 2.951709  | 0.718860  | -0.092163 |
| 18     | 6      | 0    | 2.738214  | -2.087996 | 0.037700  |
| 19     | 6      | 0    | 1.233427  | 5.188537  | -0.466347 |
| 20     | 6      | 0    | 1.128908  | 4.606955  | 0.799424  |
| 21     | 6      | 0    | 1.094374  | 4.395564  | -1.607319 |
| 22     | 1      | 0    | 2.681333  | -3.172816 | 0.074164  |
| 23     | 1      | 0    | 3.034646  | 1.798352  | -0.145591 |
| 24     | 1      | 0    | 1.236760  | 5.228687  | 1.685117  |
| 25     | 1      | 0    | 1.421482  | 6.254683  | -0.558822 |
| 26     | 1      | 0    | 1.171943  | 4.834451  | -2.598160 |
| 27     | 1      | 0    | -3.973859 | 2.059810  | -0.147502 |
| 28     | 7      | 0    | -5.002287 | -0.419700 | -0.041348 |
| 29     | 7      | 0    | 5.234985  | -2.011926 | 0.045333  |
| 30     | 14     | 0    | -0.080787 | -2.223574 | 0.020303  |
| 31     | 6      | 0    | -0.254547 | -3.322160 | -1.506455 |
| 32     | 1      | 0    | 0.503383  | -4.115380 | -1.511708 |
| 33     | 1      | 0    | -1.237736 | -3.808565 | -1.530868 |
| 34     | 1      | 0    | -0.143132 | -2.744327 | -2.431021 |

|    |   |   |           |           |           |
|----|---|---|-----------|-----------|-----------|
| 35 | 6 | 0 | -0.269878 | -3.236773 | 1.603191  |
| 36 | 1 | 0 | -1.254067 | -3.719888 | 1.646067  |
| 37 | 1 | 0 | 0.485867  | -4.030279 | 1.657273  |
| 38 | 1 | 0 | -0.164300 | -2.610704 | 2.496486  |
| 39 | 6 | 0 | 5.551534  | 0.358032  | -0.030202 |
| 40 | 1 | 0 | 5.811600  | 0.833075  | 0.923656  |
| 41 | 1 | 0 | 5.815041  | 1.060444  | -0.826526 |
| 42 | 6 | 0 | 6.284285  | -0.999239 | -0.189868 |
| 43 | 1 | 0 | 7.100410  | -1.136692 | 0.526448  |
| 44 | 1 | 0 | 6.695283  | -1.130031 | -1.201181 |
| 45 | 6 | 0 | 5.538628  | -3.428431 | -0.030480 |
| 46 | 1 | 0 | 4.769440  | -4.008843 | 0.484578  |
| 47 | 1 | 0 | 5.608867  | -3.772203 | -1.072821 |
| 48 | 1 | 0 | 6.496022  | -3.617639 | 0.463601  |
| 49 | 1 | 0 | 0.743235  | 2.403844  | -2.352374 |
| 50 | 6 | 0 | 0.779203  | 2.639243  | 2.349500  |
| 51 | 1 | 0 | -0.196108 | 2.164277  | 2.513515  |
| 52 | 1 | 0 | 1.542379  | 1.869736  | 2.521246  |
| 53 | 1 | 0 | 0.906425  | 3.410598  | 3.114841  |
| 54 | 6 | 0 | -5.524479 | -1.799282 | -0.084426 |
| 55 | 1 | 0 | -5.021877 | -2.376219 | -0.867659 |
| 56 | 6 | 0 | -6.091591 | 0.576012  | 0.010577  |
| 57 | 1 | 0 | -5.894365 | 1.319085  | 0.790125  |
| 58 | 1 | 0 | -6.166430 | 1.100701  | -0.952473 |
| 59 | 1 | 0 | -5.347578 | -2.299724 | 0.878456  |
| 60 | 6 | 0 | -7.023699 | -1.616195 | -0.359435 |
| 61 | 1 | 0 | -7.618375 | -2.441480 | 0.041723  |
| 62 | 1 | 0 | -7.202546 | -1.566800 | -1.440090 |
| 63 | 6 | 0 | -7.343624 | -0.264169 | 0.297809  |
| 64 | 1 | 0 | -8.250258 | 0.202335  | -0.097035 |
| 65 | 1 | 0 | -7.472307 | -0.386790 | 1.379822  |

---



---

Compound **31**

HOMO -8.02 eV  
LUMO -5.69 eV

E(RB3LYP) = -1602.45157625 a.u.

| Center<br>Number | Atomic<br>Number | Atomic<br>Type | Coordinates (Angstroms) |           |           |
|------------------|------------------|----------------|-------------------------|-----------|-----------|
|                  |                  |                | X                       | Y         | Z         |
| 1                | 6                | 0              | 1.696396                | -1.837182 | -0.002623 |
| 2                | 6                | 0              | 1.720685                | 0.926267  | -0.090951 |
| 3                | 6                | 0              | 2.957128                | -1.162027 | -0.021627 |
| 4                | 6                | 0              | 2.936859                | 0.275977  | -0.063673 |
| 5                | 1                | 0              | 1.693614                | -2.920332 | 0.032853  |
| 6                | 1                | 0              | 1.727502                | 2.007250  | -0.126596 |
| 7                | 6                | 0              | 0.481876                | -1.176896 | -0.028077 |
| 8                | 6                | 0              | -0.580452               | 2.532262  | -0.177373 |
| 9                | 6                | 0              | -2.096173               | 0.543589  | -0.099754 |
| 10               | 6                | 0              | 0.453867                | 0.259842  | -0.077014 |
| 11               | 6                | 0              | -2.444652               | -0.850614 | -0.048724 |
| 12               | 6                | 0              | -0.746118               | 1.037158  | -0.108937 |
| 13               | 6                | 0              | -4.840344               | -0.289175 | -0.082562 |
| 14               | 6                | 0              | -0.516869               | 3.316527  | 0.995550  |
| 15               | 6                | 0              | -0.493821               | 3.141865  | -1.438216 |
| 16               | 6                | 0              | -4.495900               | 1.088879  | -0.133420 |
| 17               | 6                | 0              | -3.180135               | 1.479790  | -0.142777 |
| 18               | 6                | 0              | -3.776350               | -1.234348 | -0.041280 |
| 19               | 6                | 0              | -0.280976               | 5.309807  | -0.401527 |
| 20               | 6                | 0              | -0.345308               | 4.525512  | -1.555074 |
| 21               | 6                | 0              | -0.365643               | 4.704380  | 0.854518  |
| 22               | 1                | 0              | -4.029101               | -2.290172 | -0.004077 |
| 23               | 1                | 0              | -2.962977               | 2.540199  | -0.187694 |
| 24               | 1                | 0              | -0.545023               | 2.525138  | -2.332551 |
| 25               | 1                | 0              | -0.281989               | 4.982888  | -2.538539 |
| 26               | 1                | 0              | -0.166900               | 6.387741  | -0.476729 |
| 27               | 1                | 0              | -0.315982               | 5.319339  | 1.750077  |
| 28               | 6                | 0              | -0.611132               | 2.695711  | 2.371935  |

|    |    |   |           |           |           |
|----|----|---|-----------|-----------|-----------|
| 29 | 1  | 0 | -0.525174 | 3.459883  | 3.150109  |
| 30 | 1  | 0 | -1.567303 | 2.177749  | 2.518489  |
| 31 | 1  | 0 | 0.182171  | 1.956701  | 2.540119  |
| 32 | 7  | 0 | 4.120792  | -1.852846 | -0.000587 |
| 33 | 7  | 0 | -6.139754 | -0.666929 | -0.075583 |
| 34 | 14 | 0 | -1.111900 | -2.179485 | 0.000043  |
| 35 | 6  | 0 | -1.235167 | -3.192716 | 1.589203  |
| 36 | 1  | 0 | -2.188778 | -3.732960 | 1.639222  |
| 37 | 1  | 0 | -0.433374 | -3.939607 | 1.644635  |
| 38 | 1  | 0 | -1.163224 | -2.555716 | 2.478104  |
| 39 | 6  | 0 | -1.228187 | -3.291492 | -1.522000 |
| 40 | 1  | 0 | -0.424674 | -4.038596 | -1.529131 |
| 41 | 1  | 0 | -2.180654 | -3.835729 | -1.540288 |
| 42 | 1  | 0 | -1.155712 | -2.711008 | -2.448756 |
| 43 | 6  | 0 | -6.638774 | -2.042008 | -0.027394 |
| 44 | 1  | 0 | -6.251018 | -2.599323 | -0.890815 |
| 45 | 1  | 0 | -6.262159 | -2.532805 | 0.880192  |
| 46 | 6  | 0 | 4.083324  | -3.319220 | 0.040122  |
| 47 | 1  | 0 | 3.580681  | -3.674149 | 0.946779  |
| 48 | 1  | 0 | 3.568189  | -3.723625 | -0.838233 |
| 49 | 1  | 0 | 5.096460  | -3.712117 | 0.043401  |
| 50 | 6  | 0 | 5.354766  | 0.290878  | -0.055107 |
| 51 | 1  | 0 | 6.310509  | 0.810379  | -0.065105 |
| 52 | 6  | 0 | 5.474944  | -1.210788 | -0.019956 |
| 53 | 6  | 0 | 4.214771  | 0.998456  | -0.077647 |
| 54 | 6  | 0 | 6.255172  | -1.603199 | 1.259621  |
| 55 | 1  | 0 | 6.462031  | -2.677015 | 1.310909  |
| 56 | 1  | 0 | 7.220297  | -1.085766 | 1.269579  |
| 57 | 1  | 0 | 5.700959  | -1.307513 | 2.156120  |
| 58 | 6  | 0 | 6.245692  | -1.662692 | -1.285686 |
| 59 | 1  | 0 | 7.211541  | -1.148098 | -1.326621 |
| 60 | 1  | 0 | 6.450124  | -2.738240 | -1.289042 |
| 61 | 1  | 0 | 5.684810  | -1.407279 | -2.190336 |
| 62 | 6  | 0 | 4.225867  | 2.506094  | -0.117639 |
| 63 | 1  | 0 | 3.720769  | 2.889461  | -1.013300 |
| 64 | 1  | 0 | 3.714910  | 2.937240  | 0.752689  |

|    |   |   |           |           |           |
|----|---|---|-----------|-----------|-----------|
| 65 | 1 | 0 | 5.252157  | 2.883686  | -0.124271 |
| 66 | 1 | 0 | -6.835686 | 0.068166  | -0.108696 |
| 67 | 6 | 0 | -8.165218 | -2.058070 | -0.036413 |
| 68 | 1 | 0 | -8.563038 | -1.597062 | -0.948062 |
| 69 | 1 | 0 | -8.526524 | -3.090193 | 0.000441  |
| 70 | 1 | 0 | -8.574298 | -1.529578 | 0.832624  |
| 71 | 1 | 0 | -5.284547 | 1.836875  | -0.167873 |

---

## References:

- [S1] T. Omura, R. Sato, *J. Biol. Chem.*, 1964, **239**, 2370-2378.
- [S2] A. D. Becke, *J. Chem. Phys.*, 1993, 98, 1372-1377.
- [S3] A. D. Becke, *J. Chem. Phys.*, 1993, 98, 5648-5652.
- [S4] C. Lee, W. Yang and R. G. Parr, *Physical review. B, Condensed matter*, 1988, 37, 785-789.
- [S5] Gaussian 09, Revision A.02, M. J. Frisch, G. W. Trucks, H. B. Schlegel, G. E. Scuseria, M. A. Robb, J. R. Cheeseman, G. Scalmani, V. Barone, B. Mennucci, G. A. Petersson, H. Nakatsuji, M. Caricato, X. Li, H. P. Hratchian, A. F. Izmaylov, J. Bloino, G. Zheng, J. L. Sonnenberg, M. Hada, M. Ehara, K. Toyota, R. Fukuda, J. Hasegawa, M. Ishida, T. Nakajima, Y. Honda, O. Kitao, H. Nakai, T. Vreven, J. A. Montgomery Jr., J. E. Peralta, F. Ogliaro, M. J. Bearpark, J. Heyd, E. N. Brothers, K. N. Kudin, V. N. Staroverov, R. Kobayashi, J. Normand, K. Raghavachari, A. P. Rendell, J. C. Burant, S. S. Iyengar, J. Tomasi, M. Cossi, N. Rega, N. J. Millam, M. Klene, J. E. Knox, J. B. Cross, V. Bakken, C. Adamo, J. Jaramillo, R. Gomperts, R. E. Stratmann, O. Yazyev, A. J. Austin, R. Cammi, C. Pomelli, J. W. Ochterski, R. L. Martin, K. Morokuma, V. G. Zakrzewski, G. A. Voth, P. Salvador, J. J. Dannenberg, S. Dapprich, A. D. Daniels, Ö. Farkas, J. B. Foresman, J. V. Ortiz, J. Cioslowski and D. J. Fox, Gaussian, Inc., Wallingford, CT, USA, 2009.
- [S6] Y. Kushida, K. Hanaoka, T. Komatsu, T. Terai, T. Ueno, K. Yoshida, M. Uchiyama and T. Nagano, *Bioorg. Med. Chem. Lett.*, 2012, **22**, 3908-3911
- [S7] Y. Koide, Y. Urano, K. Hanaoka, W. Piao, M. Kusakabe, N. Saito, T. Terai, T. Okabe and T. Nagano, *J. Am. Chem. Soc.*, 2012, **134**, 5029-5031.
- [S8] T. Egawa, Y. Koide, K. Hanaoka, T. Komatsu, T. Terai and T. Nagano, *Chem. Commun.*, 2011, **47**, 4162-4164.
- [S9] Y. Koide, Y. Urano, K. Hanaoka, T. Terai and T. Nagano, *ACS Chem. Biol.*, 2011, **6**, 600-608.
